# Supplementary material for: Genomic study in Mexicans identifies a new locus for triglycerides and refines European lipid loci
Source: HighWire-hosted journal article supplement (doi:10.1136/jmedgenet-2012-101461), 2013-03-15
Supplement: jmedgenet-2012-101461supp_table3.xls [file jmedgenet-2012-101461supp_table3.xls]

## Sheet: Supplementary Table 3
	Supplementary Table 3. Hypertriglyceridemia meta-analysis results.
	SNP	Chr. (bp)1	Minor allele (MAF)	Stage1			Stage2			Combined			LD3	Locus4
				N	OR (SE)	P-value2	N	OR (SE)	P-value	N	OR (SE)	P-value
1	rs10737392	1 (4948794)	A (0.02)	2238	1.87 (0.2)	0.00254434	2115	0.78 (0.19)	0.1832	4353	1.17 (0.14)	0.2164
2	rs2071959	1 (5478654)	A (0.24)	2239	0.79 (0.07)	0.000847188	2115	0.9 (0.07)	0.1353	4354	0.85 (0.05)	0.0005951
3	rs17032281	1 (8144743)	G (0.34)	2239	1.24 (0.06)	0.000847188	2115	1.07 (0.06)	0.2697	4354	1.15 (0.04)	0.001566
4	rs2781064	1 (8849455)	A (0.27)	2239	1.22 (0.07)	0.0028135	2117	1 (0.07)	0.9543	4356	1.11 (0.05)	0.03557		RERE,ENO1,CA6
5	rs12735814	1 (9471915)	G (0.17)	2239	1.32 (0.08)	0.00084119	2116	0.97 (0.09)	0.6818	4355	1.14 (0.06)	0.03501		TMEM201,SLC25A33
6	rs10864439	1 (9825487)	A (0.46)	2239	1.21 (0.06)	0.00206852	2065	1.03 (0.06)	0.6715	4304	1.12 (0.04)	0.01189		LZIC,CTNNBIP1,CLSTN1
7	rs2454160	1 (17358240)	A (0.19)	2236	0.8 (0.07)	0.0027684	2121	1.09 (0.08)	0.2578	4357	0.93 (0.05)	0.1757		PADI2,PADI3,PADI1
8	rs869080	1 (18624451)	G (0.19)	2240	1.28 (0.08)	0.00134322	2121	1.04 (0.08)	0.5754	4361	1.16 (0.05)	0.007172		KLHDC7A,IGSF21
9	rs9439731	1 (18932058)	G (0.45)	2237	1.22 (0.06)	0.00101779				2237	1.22 (0.06)	0.001018		PAX7
10	rs521179	1 (20277752)	A (0.12)	2240	1.29 (0.08)	0.00206852	2119	0.96 (0.08)	0.6401	4359	1.11 (0.06)	0.05983		PLA2G5,PLA2G2F,PLA2G2C,PLA2G2D,PLA2G2A
11	rs4655155	1 (20300128)	A (0.49)	2239	0.8 (0.06)	0.000359834				2239	0.8 (0.06)	0.0003598		UBXD3,PLA2G5,PLA2G2F,PLA2G2C,PLA2G2D
12	rs6663310	1 (25094966)	G (0.24)	2240	1.24 (0.07)	0.00161452	2118	0.95 (0.07)	0.443	4358	1.09 (0.05)	0.08437		RUNX3,CLIC4
13	rs435833	1 (25184615)	A (0.48)	2239	0.81 (0.06)	0.000574191	2120	0.99 (0.06)	0.9081	4359	0.89 (0.04)	0.01082		RUNX3
14	rs3131521	1 (25199499)	G (0.14)	2240	1.3 (0.09)	0.00397796	2121	0.95 (0.09)	0.5441	4361	1.11 (0.06)	0.1008		RUNX3,CLIC4
15	rs1408151	1 (30924039)	A (0.37)	2237	1.24 (0.06)	0.000718784	2120	1.01 (0.06)	0.8572	4357	1.12 (0.04)	0.0108		MATN1,LAPTM5
16	rs2358755	1 (34233548)	A (0.2)	2240	1.31 (0.07)	0.000199261	2115	0.97 (0.08)	0.6947	4355	1.14 (0.05)	0.01665		CSMD2
17	rs6694435	1 (35151706)	G (0.27)	2236	0.77 (0.07)	0.000222228	2120	0.88 (0.07)	0.07963	4356	0.82 (0.05)	0.0001096		ZMYM6,DLGAP3,C1orf212
18	rs3444	1 (44892552)	A (0.31)	2238	0.8 (0.07)	0.00129339	2110	0.94 (0.07)	0.3692	4348	0.86 (0.05)	0.003348		TMEM53,RNF220,KIF2C
19	rs797913	1 (53971150)	A (0.02)	2240	1.88 (0.18)	0.000531705	2118	1.02 (0.19)	0.9011	4358	1.41 (0.13)	0.01016		TMEM48,GLIS1
20	rs2270003	1 (55021290)	A (0.35)	2239	0.81 (0.07)	0.0018409	2120	1.17 (0.07)	0.02008	4359	0.97 (0.05)	0.5412		TTC4,TTC22,PARS2,DHCR24,C1orf177,C1orf175
21	rs4927219	1 (55524409)	A (0.38)	2240	0.83 (0.06)	0.00307869	2119	1.01 (0.06)	0.8617	4359	0.91 (0.04)	0.04547		USP24
22	rs11206816	1 (56704623)	G (0.47)	2240	0.83 (0.06)	0.00217375	2114	1.01 (0.06)	0.8284	4354	0.91 (0.04)	0.04059		PPAP2B
23	rs534080	1 (57357309)	G (0.32)	2238	1.24 (0.06)	0.000965573	2120	1.01 (0.06)	0.891	4358	1.12 (0.05)	0.01387		DAB1
24	rs10889337	1 (62980607)	A (0.45)	2239	0.84 (0.06)	0.00411846	2120	0.83 (0.06)	0.00262	4359	0.83 (0.04)	3.257e-05		USP1,DOCK7,ANGPTL3
25	rs10489901	1 (64380422)	A (0.05)	2239	1.39 (0.11)	0.00279538	2120	1.22 (0.12)	0.08111	4359	1.31 (0.08)	0.0007825		UBE2U,ROR1
26	rs17126437	1 (64583748)	A (0.23)	2240	0.8 (0.07)	0.00309848	2121	1.02 (0.08)	0.808	4361	0.9 (0.05)	0.05113
27	rs4915988	1 (64819082)	G (0.4)	2239	0.83 (0.06)	0.00267149	2113	0.96 (0.06)	0.5181	4352	0.89 (0.05)	0.009203		CACHD1
28	rs987013	1 (69964747)	G (0.08)	2240	1.33 (0.1)	0.0032094	2085	1.09 (0.11)	0.4348	4325	1.22 (0.07)	0.007743		LRRC7
29	rs7515072	1 (74652461)	A (0.24)	2212	0.78 (0.07)	0.0007946	2120	0.93 (0.07)	0.297	4332	0.85 (0.05)	0.001768		TNNI3K
30	rs4077186	1 (77053419)	G (0.03)	2240	1.27 (0.14)	0.0972011	2119	0.9 (0.16)	0.5208	4359	1.09 (0.11)	0.4585		ST6GALNAC5
31	rs12136193	1 (82776920)	G (0.07)	2240	0.58 (0.14)	8.1257e-05	2121	1.09 (0.12)	0.4738	4361	0.83 (0.09)	0.02009
32	rs1246159	1 (84735588)	G (0.48)	2240	1.2 (0.06)	0.00344217	2117	0.97 (0.06)	0.5709	4357	1.08 (0.04)	0.08868		SPATA1,GNG5,DNASE2B,CTBS,BXDC5
33	rs17505638	1 (90160775)	A (0.07)	2178	0.68 (0.12)	0.00170985	2121	1.13 (0.13)	0.3541	4299	0.86 (0.09)	0.1137		ZNF326,LRRC8D
34	rs9428050	1 (90609327)	C (0.22)	2239	1.27 (0.07)	0.00132946	2120	1.04 (0.07)	0.5957	4359	1.15 (0.05)	0.007579
35	rs12565817	1 (94092821)	A (0.27)	2177	0.76 (0.07)	6.51274e-05	2118	1.13 (0.07)	0.06615	4295	0.93 (0.05)	0.1205		GCLM,DNTTIP2
36	rs9651142	1 (101450320)	G (0.11)	2240	1.35 (0.09)	0.00150352	2119	0.91 (0.1)	0.3621	4359	1.12 (0.07)	0.101		S1PR1
37	rs12407294	1 (101474020)	G (0.34)	2238	1.21 (0.06)	0.00268017	2115	0.9 (0.06)	0.1114	4353	1.05 (0.04)	0.2969		S1PR1
38	rs17014913	1 (103907158)	G (0.24)	2231	1.27 (0.07)	0.000745054	2119	1.12 (0.07)	0.09564	4350	1.19 (0.05)	0.000346		RNPC3,AMY2A,AMY2B,AMY1B,AMY1C,AMY1A
39	rs12143543	1 (106076587)	G (0.21)	2240	1.27 (0.07)	0.000666395	2120	1.09 (0.07)	0.2591	4360	1.18 (0.05)	0.001255
40	rs2125749	1 (108285923)	A (0.25)	2239	0.81 (0.07)	0.00175058				2239	0.81 (0.07)	0.001751		VAV3
41	rs10494095	1 (109067710)	G (0.05)	2240	1.52 (0.13)	0.00103577	2121	0.92 (0.13)	0.5142	4361	1.2 (0.09)	0.05792		STXBP3,PRPF38B,FNDC7,FAM102B,C1orf62,C1orf59
42	rs928478	1 (109082333)	A (0.35)	2238	1.23 (0.06)	0.00113804	2108	1.04 (0.07)	0.5597	4346	1.14 (0.05)	0.00612		STXBP3,PRPF38B,FNDC7,FAM102B,C1orf62,C1orf59
43	rs7522157	1 (109167809)	A (0.14)	2234	1.27 (0.08)	0.00316865	2104	1.07 (0.08)	0.4054	4338	1.17 (0.06)	0.006995		STXBP3,GPSM2,FNDC7,C1orf62
44	rs10453833	1 (111711482)	G (0.1)	2240	1.38 (0.1)	0.00164204	2120	1.15 (0.11)	0.198	4360	1.27 (0.07)	0.001609		WDR77,OVGP1,CHIA,C1orf88,ATP5F1
45	rs11102731	1 (114449310)	A (0.46)	2240	1.21 (0.06)	0.00209611	2120	0.97 (0.06)	0.5754	4360	1.08 (0.04)	0.06962		SYT6
46	rs12089467	1 (116620848)	A (0.19)	2238	0.77 (0.08)	0.00073181				2238	0.77 (0.08)	0.0007318		ATP1A1
47	rs10489819	1 (117943967)	A (0.24)	2238	1.24 (0.07)	0.00233699	2119	0.95 (0.07)	0.4636	4357	1.09 (0.05)	0.09487		MAN1A2,FAM46C
48	rs17023793	1 (119821341)	A (0.07)	2239	1.42 (0.11)	0.00187821	2121	1.19 (0.11)	0.1172	4360	1.3 (0.08)	0.0008985		HSD3B2,HSD3B1,HAO2
49	rs1177696	1 (154775101)	A (0.48)	2227	0.82 (0.06)	0.00189712	2116	0.99 (0.06)	0.838	4343	0.9 (0.04)	0.01794		TTC24,MEF2D,IQGAP3,HAPLN2,GPATCH4,APOA1BP
50	rs822431	1 (155168905)	C (0.32)	2239	0.8 (0.07)	0.000806017	2116	0.93 (0.07)	0.3021	4355	0.86 (0.05)	0.001797		PEAR1,NTRK1,INSRR,C1orf92,ARHGEF11
51	rs7515516	1 (155462802)	A (0.44)	2224	0.82 (0.06)	0.00157671	2120	1 (0.06)	0.9841	4344	0.9 (0.04)	0.02462		ETV3
52	rs1186685	1 (158295836)	G (0.16)	2240	1.3 (0.08)	0.000626609	2120	1.04 (0.08)	0.5988	4360	1.17 (0.05)	0.004831		PIGM,KCNJ9,KCNJ10,IGSF8,ATP1A4,ATP1A2
53	rs17459307	1 (160482292)	A (0.03)	2198	0.51 (0.2)	0.000945388				2198	0.51 (0.2)	0.0009454		NOS1AP
54	rs12733377	1 (160519067)	A (0.35)	2239	1.21 (0.06)	0.00227637	2121	1.03 (0.07)	0.6701	4360	1.12 (0.05)	0.01299		NOS1AP,FLJ13137,C1orf111
55	rs1018710	1 (168487075)	G (0.44)	2238	1.23 (0.06)	0.000393775	2093	0.96 (0.06)	0.5073	4331	1.14 (0.04)	0.002624
56	rs739249	1 (170686583)	A (0.09)	2240	1.35 (0.1)	0.00211004	2121	0.83 (0.1)	0.06188	4361	1.06 (0.07)	0.3675		PIGC,DNM3,C1orf9,C1orf105
57	rs16846052	1 (171745500)	A (0.03)	2240	0.44 (0.23)	0.000615334	2121	0.87 (0.24)	0.5597	4361	0.62 (0.17)	0.004219		SLC9A11,PRDX6,ANKRD45
58	rs1322780	1 (172132209)	A (0.23)	2240	0.81 (0.07)	0.00270636	2120	0.99 (0.07)	0.9397	4360	0.9 (0.05)	0.02763		ZBTB37,SERPINC1,RC3H1,DARS2,CENPL
59	rs16847237	1 (172821039)	A (0.05)	2240	0.54 (0.18)	0.00052588	2120	1.04 (0.17)	0.7981	4360	0.76 (0.12)	0.02106		RABGAP1L
60	rs17505650	1 (180370872)	A (0.05)	2240	1.4 (0.11)	0.00324027	2119	1.03 (0.12)	0.8011	4359	1.21 (0.08)	0.02225		ZNF648
61	rs6700468	1 (181020373)	G (0.31)	2240	0.8 (0.07)	0.00216659	2117	1.01 (0.07)	0.9164	4357	0.9 (0.05)	0.03355		NPL,DHX9
62	rs1902875	1 (186875734)	A (0.02)	2239	1.76 (0.19)	0.0027684	2120	1.3 (0.2)	0.1937	4359	1.53 (0.14)	0.002281
63	rs1323086	1 (192208998)	C (0.05)	2211	0.6 (0.15)	0.000703438	2121	1.12 (0.14)	0.4183	4332	0.83 (0.1)	0.0637
64	rs2506058	1 (192372903)	A (0.15)	2240	0.74 (0.09)	0.00137114	2118	1.05 (0.09)	0.5832	4358	0.88 (0.07)	0.05586
65	rs10754147	1 (193939207)	A (0.46)	2240	0.82 (0.06)	0.00116604	2120	0.98 (0.06)	0.7528	4360	0.89 (0.04)	0.01086
66	rs12407399	1 (196291977)	G (0.04)	2240	1.49 (0.15)	0.00755145	2115	0.98 (0.15)	0.9145	4355	1.22 (0.11)	0.0656		KCNT2
67	rs12405238	1 (196661613)	A (0.42)	2240	1.19 (0.06)	0.00640567	2119	0.91 (0.06)	0.1428	4359	1.04 (0.04)	0.351		KCNT2,CFHR3,CFH
68	rs2185781	1 (201173129)	A (0.1)	2240	1.4 (0.1)	0.000737081	2114	1.12 (0.1)	0.2656	4354	1.25 (0.07)	0.00139		TMEM183B,TMEM183A,RABIF,KLHL12,CYB5R1,ADIPOR1
69	rs17259916	1 (207004026)	A (0.47)	2217	0.83 (0.06)	0.00227637	2118	1.12 (0.06)	0.07157	4335	0.96 (0.04)	0.3561
70	rs1988163	1 (207648106)	A (0.46)	2240	0.82 (0.06)	0.0010953	2120	1.04 (0.06)	0.5146	4360	0.92 (0.04)	0.05933		LOC642587
71	rs10863316	1 (215512946)	A (0.45)	2238	0.82 (0.06)	0.00120297	2120	1.01 (0.06)	0.8092	4358	0.91 (0.04)	0.03139
72	rs1567602	1 (218579142)	A (0.41)	2240	0.8 (0.06)	0.000608661	2040	0.97 (0.06)	0.6216	4280	0.88 (0.04)	0.004795		RAB3GAP2
73	rs35455442	1 (220781762)	C (0.33)	2239	1.23 (0.06)	0.00124099	2121	0.92 (0.07)	0.1769	4360	1.07 (0.05)	0.17		TAF1A,MIA3,HHIPL2
74	rs17575128	1 (222999193)	A (0.07)	2239	1.48 (0.11)	0.000342611	2120	1.28 (0.12)	0.04453	4359	1.39 (0.08)	7.266e-05		CNIH3
75	rs9804107	1 (223078380)	C (0.01)	2237	2.09 (0.24)	0.00212405	2121	0.64 (0.27)	0.09808	4358	1.24 (0.18)	0.295		CNIH3
76	rs2662918	1 (223103095)	C (0.34)	2240	0.8 (0.07)	0.00069588	2117	1.07 (0.06)	0.3202	4357	0.92 (0.05)	0.0821		C1orf67
77	rs2740170	1 (224091420)	A (0.1)	2240	1.45 (0.1)	0.000144168	2113	0.95 (0.11)	0.6181	4353	1.2 (0.07)	0.01735		TMEM63A,SRP9,PYCR2,LEFTY2,LEFTY1,EPHX1
78	rs3007716	1 (224192240)	G (0.07)	2239	1.35 (0.1)	0.00288705	2082	0.86 (0.1)	0.1242	4321	1.08 (0.07)	0.2812		TMEM63A,PYCR2,LEFTY2,LEFTY1,EPHX1,C1orf55
79	rs708753	1 (224852153)	G (0.16)	2240	1.28 (0.08)	0.00158206	2116	1.06 (0.08)	0.4871	4356	1.17 (0.06)	0.005963		ITPKB,C1orf95
80	rs10495223	1 (224859433)	G (0.14)	2240	1.28 (0.08)	0.00342001	2119	1.08 (0.09)	0.4137	4359	1.18 (0.06)	0.007624		CNIH3
81	rs2748081	1 (227009706)	G (0.2)	2240	1.25 (0.07)	0.00312838	2119	0.9 (0.08)	0.1846	4359	1.07 (0.05)	0.2328		RHOU
82	rs237777	1 (227498539)	G (0.06)	2238	1.45 (0.11)	0.00146811	2100	1.03 (0.13)	0.8299	4338	1.24 (0.09)	0.01492		SPHAR,RAB4A,C1orf96
83	rs643009	1 (227977360)	G (0.16)	2239	1.31 (0.08)	0.000766709	2121	0.92 (0.08)	0.3413	4360	1.11 (0.06)	0.08058
84	rs16852085	1 (228813913)	A (0.02)	2239	1.79 (0.18)	0.0012757	2118	1.21 (0.18)	0.3	4357	1.48 (0.13)	0.00243		COG2,AGT
85	rs699	1 (228912417)	A (0.23)	2237	1.3 (0.07)	0.000189374	2114	0.93 (0.08)	0.3672	4351	1.12 (0.05)	0.04056		COG2,CAPN9,AGT
86	rs241305	1 (228937821)	A (0.43)	2240	1.2 (0.06)	0.00381614	2121	0.92 (0.06)	0.1638	4361	1.05 (0.04)	0.2703		RHOU
87	rs16854785	1 (229894699)	G (0.02)	2238	1.84 (0.19)	0.00145814	2110	0.75 (0.18)	0.1137	4348	1.15 (0.13)	0.2374		DISC1
88	rs16855131	1 (230028863)	C (NA)	2240	7.08 (0.68)	0.00445517				2240	7.08 (0.68)	0.004455		DISC1
89	rs821639	1 (230216466)	G (0.24)	2239	1.25 (0.07)	0.00118643	2120	1.01 (0.07)	0.9332	4359	1.12 (0.05)	0.01722		DISC1
90	rs477265	1 (232493408)	G (0.02)	2240	1.63 (0.16)	0.0022172	2119	0.94 (0.17)	0.6971	4359	1.26 (0.12)	0.05463		SLC35F3,C1orf31
91	rs605792	1 (239242378)	G (0.16)	2238	1.31 (0.08)	0.000808895	2121	0.86 (0.08)	0.06287	4359	1.06 (0.06)	0.2702		RGS7
92	rs9651083	1 (239277091)	G (0.19)	2240	1.31 (0.08)	0.000565449	2118	1.03 (0.08)	0.7373	4358	1.16 (0.06)	0.006818		RGS7
93	rs6667668	1 (239298126)	G (0.18)	2237	1.32 (0.08)	0.000355789	2062	0.95 (0.09)	0.5645	4299	1.15 (0.06)	0.02949		RGS7
94	rs2880538	1 (240840987)	G (0.05)	2240	0.6 (0.16)	0.00185326	2121	1.19 (0.16)	0.2814	4361	0.84 (0.12)	0.139		PLD5
95	rs2184185	1 (240878217)	G (0.25)	2238	1.27 (0.07)	0.000419603	2119	0.97 (0.07)	0.6742	4357	1.12 (0.05)	0.02542
96	rs1009375	1 (242233754)	G (0.15)	2239	0.76 (0.09)	0.00329233	2121	1.05 (0.1)	0.6066	4360	0.89 (0.07)	0.08064		ZNF238
97	rs4546035	2 (3281969)	A (0.23)	2240	0.79 (0.07)	0.0018164	2121	1.12 (0.08)	0.1309	4361	0.94 (0.05)	0.2373		TTC15,TSSC1
98	rs896918	2 (5273299)	G (0.46)	2214	1.23 (0.06)	0.000850202	2107	1.02 (0.06)	0.7406	4321	1.12 (0.04)	0.008817
99	rs13428841	2 (5665704)	A (0.09)	2193	0.72 (0.1)	0.00153972	2111	0.84 (0.11)	0.1006	4304	0.77 (0.08)	0.0006481		SOX11
100	rs4128890	2 (5718708)	A (0.03)	2232	0.51 (0.18)	0.000144744	2119	0.92 (0.19)	0.6695	4351	0.67 (0.13)	0.002532		SOX11
101	rs4669588	2 (10601842)	G (0.13)	2232	1.33 (0.09)	0.000880896	2120	0.93 (0.09)	0.368	4352	1.11 (0.06)	0.07949		ODC1,NOL10
102	rs7587266	2 (11774764)	A (0.36)	2240	1.2 (0.06)	0.00347507	2119	1 (0.06)	0.9573	4359	1.1 (0.04)	0.03964		NTSR2,LPIN1,GREB1
103	rs11694407	2 (12121262)	C (0.43)	2240	1.18 (0.06)	0.00875714	2064	1.07 (0.06)	0.2687	4304	1.13 (0.04)	0.007882
104	rs16859555	2 (13022673)	A (0.45)	2232	1.2 (0.06)	0.00380824	2119	1.03 (0.06)	0.6278	4351	1.11 (0.04)	0.01592
105	rs11687529	2 (19930776)	G (0.07)	2239	1.46 (0.1)	0.000341318	2120	1.03 (0.11)	0.7674	4359	1.23 (0.07)	0.005549		WDR35,TTC32
106	rs11126598	2 (21093869)	A (0.36)	2240	0.82 (0.07)	0.00259452	2118	0.85 (0.07)	0.0178	4358	0.83 (0.05)	0.0001381		APOB
107	rs2278593	2 (27132517)	G (0.13)	2238	1.38 (0.08)	6.78945e-05	2119	1.19 (0.08)	0.02724	4357	1.28 (0.06)	1.108e-05		TMEM214,TCF23,PREB,MAPRE3,KHK,EMILIN1,CGREF1,C2orf53,AGBL5,ABHD1
108	rs1260326	2 (27584444)	A (0.26)	2238	1.39 (0.06)	2.13707e-07	2056	1.43 (0.07)	2.11e-07	4294	1.41 (0.05)	2.209e-13		ZNF512,PPM1G,NRBP1,KRTCAP3,IFT172,GCKR,FNDC4,C2orf16
109	rs780094	2 (27594741)	A (0.27)	2240	1.37 (0.06)	7.01594e-07	2121	1.42 (0.07)	1.51e-07	4361	1.39 (0.05)	5.288e-13	rs1260326 (1)	ZNF512,NRBP1,KRTCAP3,IFT172,GCKR,FNDC4,C2orf16
110	rs12468596	2 (28357445)	A (0.17)	2165	0.74 (0.08)	0.00025739	2113	0.95 (0.08)	0.4893	4278	0.84 (0.06)	0.002029		BRE
111	rs882631	2 (29134295)	A (0.09)	2240	1.36 (0.1)	0.00164759	2116	1.17 (0.1)	0.1305	4356	1.27 (0.07)	0.00093		LOC165186,CLIP4,C2orf71
112	rs4951964	2 (31154048)	A (0.13)	2210	0.76 (0.09)	0.0029719	2118	0.77 (0.09)	0.006768	4328	0.77 (0.07)	5.89e-05		GALNT14
113	rs207411	2 (31392143)	G (0.07)	2240	0.66 (0.12)	0.000803149	2120	1.11 (0.13)	0.4304	4360	0.84 (0.09)	0.06394		XDH,EHD3
114	rs10490454	2 (32977230)	G (0.08)	2238	1.35 (0.1)	0.0023065	2121	1.12 (0.1)	0.2645	4359	1.24 (0.07)	0.003056		TTC27,LTBP1
115	rs6758248	2 (33831382)	A (0.38)	2238	1.24 (0.06)	0.000551557	2117	1.01 (0.06)	0.8116	4355	1.13 (0.04)	0.008229
116	rs13005071	2 (34444524)	A (0.04)	2239	0.57 (0.18)	0.00151378				2239	0.57 (0.18)	0.001514
117	rs6747593	2 (36902228)	A (0.48)	2223	0.81 (0.06)	0.000906187	2120	1.16 (0.06)	0.01418	4343	0.97 (0.04)	0.509		VIT,STRN
118	rs3845787	2 (37769564)	G (0.39)	2235	0.82 (0.06)	0.00227637	2107	1.09 (0.07)	0.2129	4342	0.94 (0.05)	0.1863		CDC42EP3
119	rs13402063	2 (40640198)	G (0.16)	2240	1.3 (0.08)	0.00222452	2106	1.06 (0.08)	0.4973	4346	1.17 (0.06)	0.007625		SLC8A1
120	rs12471180	2 (41675943)	A (0.37)	2239	0.83 (0.06)	0.00294337	2121	0.98 (0.07)	0.8102	4360	0.9 (0.05)	0.02154
121	rs1439269	2 (58158382)	A (0.31)	2239	0.77 (0.07)	0.000132568	2106	0.95 (0.07)	0.4878	4345	0.85 (0.05)	0.001254		VRK2,FANCL
122	rs11903456	2 (58247340)	A (0.21)	2238	0.78 (0.08)	0.00156076	2118	0.94 (0.08)	0.4305	4356	0.85 (0.06)	0.004848		VRK2,FANCL
123	rs2215964	2 (58943894)	G (0.33)	2240	0.81 (0.07)	0.0022172	2120	0.82 (0.07)	0.004453	4360	0.82 (0.05)	2.964e-05
124	rs17050456	2 (59915556)	A (0.2)	2198	0.78 (0.08)	0.00189712	2117	0.88 (0.08)	0.1233	4315	0.83 (0.06)	0.0009803
125	rs227778	2 (71725741)	A (0.47)	2240	1.2 (0.06)	0.00278636	2120	0.93 (0.06)	0.2298	4360	1.06 (0.04)	0.1915		DYSF
126	rs714938	2 (75688445)	A (0.03)	2239	1.68 (0.16)	0.00169266	2118	1.06 (0.17)	0.7176	4357	1.35 (0.12)	0.01232		MRPL19,FAM176A,C2orf3
127	rs895024	2 (80534341)	A (0.38)	2238	0.83 (0.06)	0.00266284	2121	0.99 (0.07)	0.8293	4359	0.9 (0.05)	0.02128		CTNNA2
128	rs10496276	2 (82913481)	C (0.1)	2240	0.71 (0.11)	0.00183475	2119	1.1 (0.12)	0.4103	4359	0.87 (0.08)	0.09702
129	rs1517854	2 (104707057)	A (0.48)	2240	1.2 (0.06)	0.00272396	2115	0.96 (0.06)	0.5204	4355	1.08 (0.04)	0.08881
130	rs11888652	2 (108138653)	A (0.23)	2176	0.74 (0.08)	0.000112865	2121	0.95 (0.08)	0.556	4297	0.84 (0.06)	0.001571		SULT1C3
131	rs10793770	2 (110331912)	A (0.3)	2237	1.33 (0.06)	1.36252e-05	2119	1.01 (0.06)	0.8603	4356	1.16 (0.05)	0.001196		NPHP1
132	rs4564774	2 (118769375)	G (0.05)	2240	0.62 (0.15)	0.00188449	2075	1.05 (0.15)	0.7236	4315	0.81 (0.11)	0.04616
133	rs6542446	2 (118786637)	A (0)	2240	0.44 (0.26)	0.00181811	2115	1.64 (0.57)	0.3886	4355	0.55 (0.24)	0.1019	rs4564774 (0.8)
134	rs12990473	2 (124170989)	A (0.25)	2240	1.26 (0.07)	0.00139959	2118	0.97 (0.07)	0.696	4358	1.11 (0.05)	0.04359
135	rs12618696	2 (126111628)	G (0.31)	2238	1.23 (0.06)	0.00138056	2117	1.03 (0.07)	0.6205	4355	1.13 (0.05)	0.008334
136	rs2948068	2 (128461050)	A (0.17)	2228	0.78 (0.08)	0.00212405	2082	1 (0.08)	0.988	4310	0.88 (0.06)	0.02646		SAP130
137	rs2313160	2 (131553712)	C (0.11)	2240	1.33 (0.09)	0.00259452	2116	1.14 (0.1)	0.1911	4356	1.24 (0.07)	0.002132		PLEKHB2,FAM168B,ARHGEF4
138	rs13027234	2 (132850077)	A (0.06)	2240	1.45 (0.12)	0.00169837	2121	0.91 (0.12)	0.4512	4361	1.16 (0.08)	0.08473		GPR39
139	rs13422213	2 (140974889)	G (0.15)	2239	0.75 (0.09)	0.00191621	2120	0.92 (0.09)	0.3687	4359	0.83 (0.07)	0.004362		LRP1B
140	rs2380897	2 (141303698)	G (0.12)	2240	0.7 (0.11)	0.00121133	2110	1.11 (0.1)	0.3117	4350	0.89 (0.07)	0.1057		LRP1B
141	rs4624329	2 (147122322)	A (0.06)	2237	0.67 (0.13)	0.00195492	2111	0.85 (0.12)	0.2017	4348	0.76 (0.09)	0.001864
142	rs4246608	2 (148923413)	A (0.07)	2240	0.65 (0.14)	0.00208227	2119	0.94 (0.14)	0.6511	4359	0.78 (0.1)	0.01167		MBD5
143	rs10197940	2 (152253918)	G (0.41)	2237	1.21 (0.06)	0.00196798	2093	1 (0.06)	0.9895	4330	1.1 (0.04)	0.0255		TNFAIP6,RIF1,NEB
144	rs10210349	2 (161286438)	G (0.24)	2240	0.77 (0.07)	0.000231913	2120	1.01 (0.07)	0.8705	4360	0.88 (0.05)	0.01157		RBMS1
145	rs13424762	2 (165808742)	G (0.03)	2240	1.72 (0.17)	0.00160907	2121	0.79 (0.16)	0.1469	4361	1.15 (0.12)	0.2117		SCN2A,SCN3A
146	rs2723246	2 (171549471)	G (0.01)	2240	3.58 (0.4)	0.00183328	2121	0.84 (0.35)	0.6226	4361	1.57 (0.27)	0.05876		TLK1,GORASP2
147	rs13408254	2 (171685105)	NA (NA)	2240	0.01 (3.05)	0.171668				2240	0.01 (3.05)	0.1717		TLK1
148	rs13019331	2 (173175547)	A (0.33)	2204	0.79 (0.07)	0.00100362	2119	1.05 (0.07)	0.4861	4323	0.91 (0.05)	0.06272		PDK1,ITGA6
149	rs935398	2 (174566892)	A (0.45)	2239	1.2 (0.06)	0.00275945	2120	0.91 (0.06)	0.1175	4359	1.05 (0.04)	0.292		SP3,OLA1
150	rs4972473	2 (176083343)	G (0.19)	2240	0.77 (0.08)	0.000925596	2121	0.96 (0.08)	0.5955	4361	0.86 (0.06)	0.006068
151	rs16863792	2 (176990201)	A (0.39)	2239	1.2 (0.06)	0.00342039	2116	1 (0.06)	0.9935	4355	1.1 (0.04)	0.03633		MTX2
152	rs4894054	2 (179421846)	C (0.38)	2228	0.82 (0.06)	0.00152929	1973	0.96 (0.07)	0.5525	4201	0.88 (0.05)	0.006628		TTN,CCDC141
153	rs1400820	2 (180082843)	G (0.27)	2238	1.24 (0.07)	0.00130232	2118	0.99 (0.07)	0.882	4356	1.12 (0.05)	0.02772		ZNF385B
154	rs3112945	2 (180209559)	A (0.19)	2240	0.76 (0.08)	0.00082931				2240	0.76 (0.08)	0.0008293		ZNF385B
155	rs1454301	2 (190518307)	C (0.19)	2239	1.27 (0.08)	0.00162548	2120	1.06 (0.08)	0.4304	4359	1.17 (0.06)	0.004979		PMS1
156	rs6434507	2 (192324618)	G (0.03)	2240	0.49 (0.22)	0.00178621	2109	0.72 (0.26)	0.2173	4349	0.58 (0.17)	0.001929		SDPR,OBFC2A
157	rs2356961	2 (192754465)	A (0.47)	2239	0.82 (0.06)	0.00114598	2120	1.03 (0.06)	0.6014	4359	0.91 (0.04)	0.04926		TMEFF2
158	rs6733196	2 (196647539)	A (0.37)	2236	1.2 (0.06)	0.0037488	2118	1 (0.06)	0.9685	4354	1.1 (0.04)	0.03532		SLC39A10,DNAH7
159	rs16840921	2 (204820172)	A (0.49)	2239	1.21 (0.06)	0.00223922	2121	0.86 (0.06)	0.01632	4360	1.02 (0.04)	0.6064
160	rs2048277	2 (210860019)	G (0.05)	2240	1.51 (0.14)	0.00269761	2120	1 (0.13)	0.9759	4360	1.22 (0.1)	0.03322		MYL1,ACADL
161	rs4278873	2 (212069319)	G (0.04)	2240	1.66 (0.12)	4.79321e-05	2120	0.88 (0.14)	0.3327	4360	1.24 (0.09)	0.02519		ERBB4
162	rs1394782	2 (212909165)	G (0.32)	2240	1.26 (0.06)	0.000239204	2121	1 (0.06)	0.971	4361	1.13 (0.04)	0.007857		ERBB4
163	rs1397354	2 (214624639)	G (0.4)	2227	1.2 (0.06)	0.00293391	2121	1.05 (0.06)	0.4382	4348	1.13 (0.04)	0.007579		SPAG16
164	rs10932605	2 (215868486)	C (0.15)	2240	1.29 (0.08)	0.00215944	2116	0.72 (0.08)	8.78e-05	4356	0.97 (0.06)	0.5934		FN1,ATIC
165	rs10199646	2 (217910120)	A (0.1)	2240	1.4 (0.1)	0.00130681	2121	0.8 (0.1)	0.02806	4361	1.05 (0.07)	0.4401
166	rs7578940	2 (218791563)	A (0.48)	2230	1.2 (0.06)	0.00312838				2230	1.2 (0.06)	0.003128		TMBIM1,PNKD,IL8RB,IL8RA,GPBAR1,ARPC2,AAMP
167	rs17472512	2 (220820550)	A (0.05)	2238	0.59 (0.15)	0.000599867	2118	0.95 (0.16)	0.7758	4356	0.74 (0.11)	0.007853
168	rs824921	2 (222494772)	C (0.39)	2238	0.82 (0.06)	0.00223922				2238	0.82 (0.06)	0.002239
169	rs10932942	2 (222700383)	G (0.04)	2240	1.57 (0.15)	0.00332393	2120	1.05 (0.17)	0.7855	4360	1.31 (0.11)	0.02177		PAX3
170	rs11903376	2 (226392230)	A (0.19)	2223	0.74 (0.09)	0.000602054	2118	0.98 (0.09)	0.7841	4341	0.85 (0.06)	0.008135
171	rs7559746	2 (226517280)	G (0.31)	2239	1.25 (0.06)	0.000576291	2119	0.99 (0.06)	0.8501	4358	1.11 (0.05)	0.0195
172	rs1882575	2 (227566750)	A (0.23)	2240	1.25 (0.07)	0.00130681	2119	1.09 (0.07)	0.2007	4359	1.17 (0.05)	0.001391		IRS1
173	rs11675161	2 (227686723)	G (0.36)	2238	0.81 (0.06)	0.00123671	2121	1.06 (0.07)	0.3423	4359	0.93 (0.05)	0.0985		COL4A4,COL4A3
174	rs17372264	2 (228277434)	G (0.21)	2239	1.25 (0.07)	0.00117416	2121	0.96 (0.07)	0.5333	4360	1.1 (0.05)	0.05863		SLC19A3,DKFZp547H025
175	rs10933204	2 (228285907)	A (0.31)	2238	0.79 (0.07)	0.000649736	2111	1.01 (0.07)	0.9073	4349	0.89 (0.05)	0.01803		SLC19A3,DKFZp547H025
176	rs11676027	2 (235693599)	A (0.02)	2235	1.92 (0.17)	0.000142455	2118	0.85 (0.17)	0.3606	4353	1.29 (0.12)	0.0368		SH3BP4
177	rs11682474	2 (236033884)	T (0.04)	2240	1.5 (0.17)	0.0187049	2118	0.86 (0.17)	0.3865	4358	1.14 (0.12)	0.2792		SH3BP4
178	rs6758509	2 (238239165)	A (0.25)	2240	1.25 (0.07)	0.0011341	2120	0.92 (0.07)	0.2241	4360	1.07 (0.05)	0.1375		RAB17,PRLH,LRRFIP1
179	rs7609846	3 (2599673)	G (0.07)	2240	1.45 (0.11)	0.00119882	2119	1.05 (0.12)	0.7122	4359	1.25 (0.08)	0.009903		CNTN4
180	rs10510277	3 (3846204)	C (0.17)	2240	1.38 (0.09)	0.00036601	2121	1.08 (0.08)	0.3321	4361	1.21 (0.06)	0.001237		LRRN1
181	rs17040736	3 (4490191)	A (0.39)	2223	0.82 (0.07)	0.00272396	2121	0.97 (0.07)	0.6847	4344	0.89 (0.05)	0.01519		SUMF1,ITPR1
182	rs4143282	3 (5694146)	A (0.11)	2234	1.35 (0.09)	0.000874676	2118	1.01 (0.09)	0.9242	4352	1.17 (0.06)	0.01425
183	rs6796207	3 (7165475)	A (0.19)	2240	1.28 (0.07)	0.000838205	2103	1 (0.07)	0.9642	4343	1.13 (0.05)	0.01511		GRM7
184	rs237915	3 (8785311)	G (0.15)	2239	1.3 (0.08)	0.00150352				2239	1.3 (0.08)	0.001504		OXTR,CAV3
185	rs391923	3 (9131033)	G (0.29)	2238	0.79 (0.07)	0.000610878	2119	0.89 (0.06)	0.08529	4357	0.84 (0.05)	0.0002562		SRGAP3
186	rs523180	3 (10445828)	A (0.26)	2236	0.8 (0.07)	0.00146811	2118	1.01 (0.08)	0.8565	4354	0.89 (0.05)	0.03129		ATP2B2
187	rs4684787	3 (11554865)	A (0.19)	2238	1.28 (0.07)	0.000777754				2238	1.28 (0.07)	0.0007778		VGLL4,ATG7
188	rs301558	3 (11768181)	A (0.21)	2240	1.29 (0.07)	0.000486743	2117	1.08 (0.07)	0.2802	4357	1.19 (0.05)	0.001139		VGLL4,C3orf31
189	rs9861586	3 (14356911)	A (0.2)	2240	0.79 (0.08)	0.00256932	2117	0.94 (0.08)	0.3887	4357	0.86 (0.05)	0.005733		SLC6A6
190	rs4684213	3 (14403029)	G (0.33)	2239	1.23 (0.06)	0.00124099	2118	0.96 (0.06)	0.4702	4357	1.08 (0.04)	0.07007		SLC6A6
191	rs17317288	3 (14550248)	G (0.09)	2240	0.71 (0.11)	0.00190983	2054	0.92 (0.12)	0.4823	4294	0.8 (0.08)	0.006376		SLC6A6,GRIP2
192	rs17539401	3 (15234465)	A (0.1)	2240	0.72 (0.11)	0.00184707	2117	0.91 (0.11)	0.4031	4357	0.8 (0.08)	0.004871		SH3BP5,CAPN7
193	rs11128974	3 (20847032)	A (0.02)	2231	1.57 (0.13)	0.000786135	2115	0.94 (0.15)	0.654	4346	1.25 (0.1)	0.03635
194	rs6786441	3 (20870746)	G (0.02)	2240	1.82 (0.14)	3.24822e-05	2120	0.88 (0.15)	0.4092	4360	1.3 (0.1)	0.01626
195	rs6550877	3 (24526782)	G (0.42)	2240	0.82 (0.06)	0.00145814	2117	1.05 (0.06)	0.4641	4357	0.92 (0.04)	0.07642		THRB
196	rs6764521	3 (25159393)	A (0.32)	2240	0.81 (0.07)	0.00295285	2120	1.01 (0.07)	0.9146	4360	0.9 (0.05)	0.03979
197	rs9877259	3 (25794632)	G (0.17)	2240	1.25 (0.08)	0.00388069	2116	1.12 (0.08)	0.1398	4356	1.18 (0.05)	0.001936		OXSM,NGLY1
198	rs6804368	3 (30728577)	G (0.17)	2240	1.27 (0.08)	0.00256097	2119	0.95 (0.08)	0.5299	4359	1.1 (0.06)	0.08469		TGFBR2,GADL1
199	rs11709194	3 (30859293)	C (0.15)	2235	1.27 (0.08)	0.00241484	2119	1.12 (0.08)	0.1779	4354	1.2 (0.06)	0.001849		GADL1
200	rs1494739	3 (30886154)	C (0.41)	2240	0.85 (0.06)	0.00812545	2120	1 (0.06)	0.9707	4360	0.92 (0.04)	0.06127		GADL1
201	rs1603189	3 (31487591)	G (0.02)	2240	0.49 (0.23)	0.00218094	2116	0.74 (0.23)	0.1869	4356	0.6 (0.16)	0.001825		STT3B
202	rs4276227	3 (32305690)	G (0.4)	2231	1.23 (0.06)	0.000853227	2116	1.05 (0.06)	0.4462	4347	1.14 (0.04)	0.003493		CMTM8
203	rs10510655	3 (32382486)	A (0.02)	2240	0.54 (0.18)	0.000589042	2120	0.99 (0.19)	0.9493	4360	0.71 (0.13)	0.01216		CMTM8,CMTM7
204	rs13086084	3 (44355492)	C (0.5)	2238	0.82 (0.06)	0.00142859	1931	1.14 (0.06)	0.05144	4169	0.96 (0.04)	0.3121		C3orf23
205	rs358010	3 (55100134)	G (0.41)	2239	1.29 (0.06)	6.90321e-05	2114	1.1 (0.06)	0.1296	4353	1.19 (0.04)	9.216e-05		CACNA2D3
206	rs9683127	3 (55381378)	A (0.1)	2239	1.47 (0.09)	2.63732e-05	2121	1.1 (0.09)	0.2859	4360	1.27 (0.06)	0.0001726		WNT5A
207	rs9840663	3 (57295044)	A (0.19)	2239	1.24 (0.07)	0.00404198	2118	0.96 (0.09)	0.6614	4357	1.11 (0.06)	0.07917		HESX1,ASB14,APPL1
208	rs4679500	3 (59595856)	G (0.16)	2239	0.78 (0.08)	0.00275945	2119	1.01 (0.08)	0.8945	4358	0.89 (0.06)	0.04006
209	rs17634797	3 (60989101)	A (0.03)	2235	1.6 (0.16)	0.00277736	2121	0.92 (0.17)	0.6308	4356	1.24 (0.11)	0.07071		FHIT
210	rs9311833	3 (61968706)	G (0.4)	2239	1.21 (0.06)	0.00251959	2109	1.03 (0.06)	0.6025	4348	1.12 (0.04)	0.01139		PTPRG
211	rs10490792	3 (64251892)	A (0.09)	2240	1.38 (0.1)	0.000968975	2120	0.94 (0.09)	0.4852	4360	1.13 (0.07)	0.06035		PRICKLE2
212	rs2024271	3 (64325072)	G (0.13)	2240	1.32 (0.08)	0.000652092	2115	1.08 (0.08)	0.3374	4355	1.2 (0.06)	0.00185
213	rs17361892	3 (65781878)	G (0.08)	2239	0.67 (0.12)	0.00124528	2121	1.16 (0.13)	0.2687	4360	0.86 (0.09)	0.1231		MAGI1
214	rs4528885	3 (67197673)	A (0.37)	2239	0.8 (0.06)	0.00049035	2121	0.99 (0.06)	0.9281	4360	0.89 (0.05)	0.01044		KBTBD8
215	rs4075188	3 (69336810)	A (0.07)	2240	0.54 (0.17)	0.000407258	2111	1.41 (0.16)	0.03709	4351	0.89 (0.12)	0.2781		LMOD3,FRMD4B,ARL6IP5
216	rs11917707	3 (74736555)	G (0.25)	2239	1.26 (0.07)	0.00119055	2121	0.96 (0.07)	0.5921	4360	1.11 (0.05)	0.0513		CNTN3
217	rs9864830	3 (86851806)	A (0.23)	2240	0.79 (0.08)	0.00166999	2120	1.02 (0.08)	0.7841	4360	0.9 (0.05)	0.0392
218	rs17465956	3 (87634670)	G (0.1)	2240	1.38 (0.09)	0.000563798	2120	0.93 (0.1)	0.4651	4360	1.15 (0.07)	0.04972
219	rs6797049	3 (89753046)	A (0.02)	2239	0.46 (0.23)	0.000642716	2115	1.05 (0.22)	0.8331	4354	0.7 (0.16)	0.02142
220	rs13096854	3 (95033268)	A (0.06)	2217	1.48 (0.12)	0.00117009	2120	1.11 (0.13)	0.4398	4337	1.3 (0.09)	0.004224		PROS1
221	rs4857461	3 (95828223)	G (0.34)	2240	1.22 (0.06)	0.00161452	2116	1 (0.06)	0.9738	4356	1.11 (0.05)	0.02237
222	rs3804778	3 (102777262)	A (0.17)	2240	1.26 (0.07)	0.00227637	2121	0.87 (0.08)	0.06923	4361	1.05 (0.05)	0.3576		ZBTB11,SENP7,RG9MTD1,PCNP,LOC730754
223	rs9809062	3 (105535718)	G (0.34)	2182	0.81 (0.07)	0.00202775	2120	0.94 (0.07)	0.362	4302	0.87 (0.05)	0.004542
224	rs1486894	3 (114694203)	A (0.08)	2235	1.37 (0.1)	0.00295285				2235	1.37 (0.1)	0.002953		WDR52,SIDT1,CCDC52
225	rs16826476	3 (118455161)	G (0.28)	2240	0.76 (0.07)	0.000109125	2119	1.04 (0.07)	0.5894	4359	0.89 (0.05)	0.01651
226	rs938170	3 (118456098)	A (0.17)	2238	1.33 (0.08)	0.000331142	2119	0.89 (0.08)	0.1214	4357	1.08 (0.05)	0.1356
227	rs6806624	3 (118491383)	G (0.14)	2240	0.77 (0.08)	0.00226145	2120	0.92 (0.09)	0.2994	4360	0.84 (0.06)	0.003588
228	rs2043172	3 (124145445)	G (0.33)	2240	1.22 (0.06)	0.00173886	2120	0.88 (0.06)	0.03685	4360	1.03 (0.04)	0.4301		SEMA5B,LOC100129550,DIRC2
229	rs6799522	3 (124242312)	A (0.11)	2239	1.35 (0.09)	0.000659207	2121	1.07 (0.09)	0.4573	4360	1.21 (0.06)	0.003084		SEMA5B,PDIA5
230	rs9840967	3 (124609796)	A (0.26)	2237	1.22 (0.07)	0.00312838	2108	0.97 (0.07)	0.696	4345	1.09 (0.05)	0.0646		PTPLB,ADCY5
231	rs9848230	3 (126754849)	A (0.04)	2240	1.69 (0.14)	0.000186426	2118	0.87 (0.14)	0.3248	4358	1.23 (0.1)	0.04631	rs9853814 (0.9)	SNX4,OSBPL11
232	rs9853814	3 (126786149)	A (0.04)	2236	1.76 (0.13)	3.72777e-05	2119	0.95 (0.14)	0.7148	4355	1.3 (0.1)	0.006935		SNX4,OSBPL11
233	rs4550784	3 (127153396)	A (0.1)	2187	1.42 (0.1)	0.000455377	2101	0.77 (0.11)	0.01733	4288	1.08 (0.07)	0.4021		SLC41A3,ROPN1B,LOC200810
234	rs11717333	3 (128301852)	G (0.24)	2238	1.22 (0.07)	0.00294337	2121	1.02 (0.07)	0.8119	4359	1.12 (0.05)	0.02164		PLXNA1,C3orf56
235	rs11715147	3 (133208008)	A (0.09)	2239	1.42 (0.11)	0.00143838	2121	1.07 (0.12)	0.5768	4360	1.25 (0.08)	0.007519		CPNE4
236	rs1913184	3 (147415454)	G (0.28)	2238	0.77 (0.07)	0.000157342	2121	0.9 (0.07)	0.1268	4359	0.83 (0.05)	0.0001613		PLSCR4,PLOD2
237	rs342920	3 (147771335)	A (0.5)	2174	0.83 (0.06)	0.00248692	2112	0.96 (0.06)	0.4874	4286	0.89 (0.04)	0.008246		PLSCR2,PLSCR5,PLSCR1
238	rs1979425	3 (151262674)	A (0.27)	2239	0.77 (0.08)	0.00084119	2116	1.06 (0.08)	0.4981	4355	0.9 (0.06)	0.05463		PFN2
239	rs6797405	3 (151457060)	A (0.37)	2240	1.23 (0.06)	0.00124958	2119	1.01 (0.06)	0.8263	4359	1.12 (0.04)	0.01364
240	rs1350794	3 (153975122)	A (0.04)	2240	1.5 (0.11)	0.000345209	2120	1.14 (0.12)	0.2902	4360	1.32 (0.08)	0.0009576		P2RY1
241	rs11921298	3 (154289811)	G (0.04)	2240	1.6 (0.13)	0.000399715	2121	1.02 (0.15)	0.877	4361	1.32 (0.1)	0.008164
242	rs7642295	3 (154530270)	A (0.1)	2239	1.3 (0.09)	0.00342039	2119	1.05 (0.1)	0.6523	4358	1.18 (0.07)	0.01585
243	rs883228	3 (155195292)	G (0.17)	2240	1.32 (0.07)	0.000185696	2121	0.96 (0.08)	0.5884	4361	1.14 (0.05)	0.02137
244	rs7616768	3 (155998625)	G (0.02)	2240	1.92 (0.19)	0.00073973	2116	0.91 (0.23)	0.6911	4356	1.41 (0.15)	0.03213
245	rs13081004	3 (156031925)	A (0.12)	2239	1.28 (0.08)	0.00303946	2117	1.08 (0.09)	0.3753	4356	1.19 (0.06)	0.00609
246	rs9848852	3 (156664074)	G (0.15)	2240	1.29 (0.08)	0.00107637	2118	1 (0.08)	0.9876	4358	1.14 (0.06)	0.01852		PLCH1
247	rs4679748	3 (156727900)	A (0.36)	2239	0.79 (0.07)	0.000595515	2101	1.01 (0.07)	0.9107	4340	0.89 (0.05)	0.01693		PLCH1
248	rs9870819	3 (157448444)	G (0.13)	2239	1.33 (0.08)	0.000437148	2117	0.9 (0.09)	0.2537	4356	1.12 (0.06)	0.08444		KCNAB1
249	rs11926141	3 (157587867)	A (0.09)	2235	1.35 (0.1)	0.00233699	2118	0.95 (0.11)	0.6318	4353	1.15 (0.07)	0.06479		KCNAB1
250	rs2280031	3 (157731908)	G (0.29)	2240	0.79 (0.07)	0.00083523	2120	0.98 (0.07)	0.7791	4360	0.88 (0.05)	0.009592		SSR3,KCNAB1
251	rs7644860	3 (158331331)	A (0.26)	2240	0.81 (0.07)	0.00371354	1781	0.83 (0.08)	0.01972	4021	0.82 (0.05)	0.0002013		LEKR1,CCNL1
252	rs10513531	3 (160107822)	A (0.12)	2240	0.73 (0.11)	0.00402936	2112	1.29 (0.11)	0.01573	4352	0.97 (0.07)	0.7034		MFSD1
253	rs7647582	3 (170235970)	A (0.19)	2216	0.74 (0.08)	0.000187895	2121	1.05 (0.08)	0.5452	4337	0.88 (0.06)	0.02467		EVI1
254	rs5400	3 (172214994)	A (0.11)	2240	1.37 (0.1)	0.00182861	2121	1.15 (0.11)	0.1928	4361	1.26 (0.07)	0.001678		TNIK,SLC2A2
255	rs17479963	3 (173050084)	A (0.25)	2178	0.76 (0.08)	0.00028114	2121	0.97 (0.08)	0.7171	4299	0.86 (0.05)	0.004515		PLD1
256	rs9854235	3 (175252205)	A (0.06)	2225	1.45 (0.11)	0.00132946	2119	0.88 (0.15)	0.3791	4344	1.2 (0.09)	0.09243		NLGN1
257	rs9883139	3 (179287526)	A (0.05)	2239	1.5 (0.13)	0.00234467	2120	1.18 (0.12)	0.1611	4359	1.32 (0.09)	0.001589
258	rs270159	3 (188312190)	G (0.39)	2240	0.82 (0.06)	0.00184707				2240	0.82 (0.06)	0.001847		ST6GAL1,RTP1,RPL39L
259	rs9867814	3 (189360278)	G (0.13)	2240	1.28 (0.08)	0.00348611	2120	0.89 (0.09)	0.1682	4360	1.07 (0.06)	0.2572		LPP
260	rs1679182	3 (189392447)	G (0.4)	2239	0.81 (0.06)	0.0012757	2119	1.12 (0.06)	0.06671	4358	0.95 (0.04)	0.3028		LPP
261	rs10513846	3 (191513683)	A (0.18)	2211	0.77 (0.08)	0.00196144	2118	0.95 (0.08)	0.5639	4329	0.86 (0.06)	0.008891		CLDN16,CLDN1
262	rs7613062	3 (192289462)	A (0.05)	2239	1.51 (0.13)	0.00187821	2121	0.93 (0.13)	0.559	4360	1.19 (0.09)	0.06872
263	rs9814786	3 (192294984)	A (0.15)	2240	1.29 (0.08)	0.00142859	2117	0.98 (0.08)	0.795	4357	1.13 (0.06)	0.03526
264	rs11917097	3 (192527490)	A (0.24)	2240	1.24 (0.07)	0.00121133	2116	0.96 (0.07)	0.5618	4356	1.1 (0.05)	0.05532		UTS2D,OSTN,CCDC50
265	rs12491822	3 (193616397)	G (0.35)	2240	0.81 (0.06)	0.00116604	2117	1.02 (0.07)	0.8025	4357	0.91 (0.05)	0.03125		FGF12
266	rs6818156	4 (8361943)	A (0.23)	2237	1.29 (0.07)	0.000292093	1877	0.95 (0.07)	0.4673	4114	1.12 (0.05)	0.02926		SH3TC1,HTRA3,ACOX3
267	rs3796751	4 (8429859)	A (0.18)	2235	1.28 (0.08)	0.00158206				2235	1.28 (0.08)	0.001582		HTRA3,C4orf23,ACOX3
268	rs3822207	4 (8431757)	A (0.09)	2233	1.36 (0.09)	0.00101423	2119	0.91 (0.1)	0.3573	4352	1.13 (0.07)	0.08692		HTRA3,C4orf23,ACOX3
269	rs11724374	4 (10769066)	G (0.37)	2237	1.23 (0.06)	0.000800289	2117	1.03 (0.06)	0.6745	4354	1.13 (0.04)	0.007018
270	rs17330900	4 (11752616)	G (0.4)	2240	1.2 (0.06)	0.00337721	2113	0.9 (0.06)	0.09982	4353	1.04 (0.04)	0.3391
271	rs4469071	4 (14428894)	A (0.49)	2238	0.81 (0.06)	0.000503171	2121	1.15 (0.06)	0.02243	4359	0.96 (0.04)	0.3679
272	rs1039539	4 (17783691)	A (0.09)	2239	0.72 (0.1)	0.00215232	2121	0.97 (0.11)	0.7518	4360	0.83 (0.08)	0.01555	rs1553460 (0.8)
273	rs1553460	4 (17804959)	T (0.11)	2240	0.71 (0.1)	0.000913341	2119	0.95 (0.1)	0.6469	4359	0.83 (0.07)	0.007009
274	rs7655220	4 (21746131)	G (0.38)	2240	1.23 (0.06)	0.00130232	2119	1.08 (0.06)	0.212	4359	1.15 (0.04)	0.001497
275	rs4452416	4 (23472971)	C (0.08)	2239	0.65 (0.14)	0.00220263	2121	0.92 (0.14)	0.5592	4360	0.77 (0.1)	0.009289	rs10213440 (0.8)	PPARGC1A
276	rs10213440	4 (23475437)	G (0.08)	2240	0.62 (0.12)	9.41505e-05	2108	0.93 (0.12)	0.5115	4348	0.76 (0.08)	0.001114		PPARGC1A
277	rs2215488	4 (23681161)	A (0.04)	2240	0.55 (0.19)	0.00218815	2121	1.29 (0.21)	0.2288	4361	0.81 (0.14)	0.175
278	rs11736751	4 (25213030)	A (0.3)	2240	0.81 (0.06)	0.00160363	2117	1 (0.07)	0.9771	4357	0.9 (0.05)	0.02247		SLC34A2
279	rs6815902	4 (28584340)	A (0.44)	2211	0.82 (0.06)	0.00149842	2120	0.99 (0.07)	0.8735	4331	0.9 (0.05)	0.01732
280	rs3884638	4 (29607559)	C (0.32)	2239	0.79 (0.07)	0.000321251	2091	0.98 (0.07)	0.807	4330	0.88 (0.05)	0.005839
281	rs446149	4 (31099803)	A (0.47)	2240	0.83 (0.06)	0.00264561	2121	1.05 (0.06)	0.4082	4361	0.93 (0.04)	0.1146
282	rs1514117	4 (35163269)	A (0.43)	2229	1.2 (0.06)	0.00414424	2120	0.97 (0.06)	0.5647	4349	1.07 (0.04)	0.09885
283	rs4263408	4 (39461671)	A (0.34)	2231	0.82 (0.07)	0.00285006	2088	0.97 (0.07)	0.6318	4319	0.88 (0.05)	0.01323		UBE2K,PDS5A
284	rs17527711	4 (40873020)	G (0.02)	2240	1.91 (0.19)	0.000640391	2121	0.97 (0.18)	0.881	4361	1.34 (0.13)	0.01916		UCHL1,APBB2
285	rs2033897	4 (47528908)	A (0.2)	2203	0.78 (0.08)	0.00272396	2118	1 (0.08)	0.9945	4321	0.89 (0.06)	0.03273		NFXL1,CORIN
286	rs1277272	4 (57604145)	A (0.13)	2239	0.75 (0.1)	0.00303946				2239	0.75 (0.1)	0.003039		POLR2B,IGFBP7,C4orf14
287	rs17226207	4 (62081839)	A (0.11)	2173	0.72 (0.09)	0.000398222	2118	0.99 (0.1)	0.9526	4291	0.83 (0.07)	0.01041		LPHN3
288	rs2349110	4 (65370091)	A (0.09)	2240	1.44 (0.11)	0.000823429	2120	0.98 (0.11)	0.8866	4360	1.2 (0.08)	0.02156
289	rs1247607	4 (74771021)	C (0.04)	2240	0.56 (0.18)	0.00117009	2121	1.62 (0.2)	0.01407	4361	0.9 (0.13)	0.5392		RASSF6,IL8
290	rs17002335	4 (78171566)	A (0.43)	2240	1.27 (0.06)	0.000296204	2117	0.9 (0.06)	0.1052	4357	1.07 (0.05)	0.1428		SEPT11,CCNI
291	rs4241599	4 (78193569)	G (0.4)	2240	1.21 (0.06)	0.00217375	2096	0.92 (0.06)	0.1742	4336	1.06 (0.04)	0.2082	rs17002335 (0.9)	SEPT11,CCNI
292	rs6857393	4 (101514587)	G (0.08)	2240	1.39 (0.12)	0.00566628	2121	0.94 (0.12)	0.6328	4361	1.15 (0.08)	0.09904		EMCN
293	rs1822698	4 (104603641)	G (0.18)	2238	0.78 (0.08)	0.00280442	2111	1.06 (0.08)	0.484	4349	0.91 (0.06)	0.09769
294	rs6858425	4 (114325225)	G (0.17)	2238	0.78 (0.08)	0.00217375	2120	1.1 (0.08)	0.2163	4358	0.93 (0.06)	0.1821		ANK2
295	rs12510650	4 (118621637)	C (0.29)	2238	0.8 (0.07)	0.000806017	2121	1.01 (0.07)	0.9318	4359	0.89 (0.05)	0.01922
296	rs11562861	4 (118699889)	C (0.07)	2240	0.58 (0.15)	0.000309911	2121	0.84 (0.13)	0.1873	4361	0.72 (0.1)	0.0004573
297	rs11562932	4 (118718835)	A (0.06)	2239	0.66 (0.13)	0.00202103				2239	0.66 (0.13)	0.002021	rs11562861 (1)
298	rs2200517	4 (119682133)	G (0.37)	2240	0.8 (0.06)	0.000570012	2120	0.98 (0.07)	0.7481	4360	0.88 (0.05)	0.007069
299	rs10857064	4 (120228616)	A (0.43)	2238	0.83 (0.06)	0.00208227				2238	0.83 (0.06)	0.002082		SYNPO2,MYOZ2
300	rs368931	4 (123851047)	C (0.29)	2239	0.79 (0.07)	0.00116604	2118	1.07 (0.07)	0.3567	4357	0.92 (0.05)	0.09197		IL21,BBS12
301	rs10003827	4 (123950303)	G (0.22)	2240	1.24 (0.07)	0.00168696	2097	0.98 (0.07)	0.8231	4337	1.11 (0.05)	0.0356		NUDT6,FGF2,BBS12
302	rs10002814	4 (129381983)	G (0.31)	2238	1.23 (0.06)	0.00135247				2238	1.23 (0.06)	0.001352		PGRMC2,LARP2
303	rs3096657	4 (139509869)	G (0.01)	2240	3.01 (0.33)	0.00105306	2121	0.58 (0.33)	0.09176	4361	1.3 (0.23)	0.2412
304	rs2217098	4 (139636948)	G (0.13)	2240	1.33 (0.08)	0.00031521	2117	1.07 (0.08)	0.4332	4357	1.2 (0.06)	0.001752
305	rs13146053	4 (140058804)	G (0.3)	2239	0.82 (0.07)	0.00301033	2121	1.05 (0.07)	0.5051	4360	0.92 (0.05)	0.09669		CCRN4L
306	rs1425443	4 (142100696)	A (0.44)	2238	0.81 (0.06)	0.00113804	2115	1.04 (0.06)	0.5575	4353	0.92 (0.05)	0.05431		RNF150
307	rs17021755	4 (147800088)	A (0.36)	2208	0.78 (0.07)	0.000215425	2120	0.93 (0.07)	0.2638	4328	0.85 (0.05)	0.0006148		TTC29,POU4F2
308	rs7657997	4 (151735416)	A (0.06)	2239	1.43 (0.12)	0.00306884	2119	0.88 (0.12)	0.3074	4358	1.13 (0.09)	0.1584		MAB21L2,LRBA
309	rs10520104	4 (152398761)	G (0.13)	2239	1.31 (0.09)	0.00319917	2121	1.01 (0.09)	0.9388	4360	1.15 (0.06)	0.03031		SH3D19,ESSPL
310	rs2407221	4 (152432053)	A (0.16)	2169	0.73 (0.1)	0.00123244	2104	0.99 (0.09)	0.8684	4273	0.86 (0.07)	0.01559		SH3D19,ESSPL
311	rs1546645	4 (156652464)	A (0.1)	2219	0.76 (0.09)	0.00241484	2121	0.93 (0.09)	0.4597	4340	0.84 (0.06)	0.007228
312	rs983473	4 (157914842)	A (0.29)	2240	0.83 (0.07)	0.00530364	2121	0.99 (0.07)	0.8253	4361	0.9 (0.05)	0.03139		PDGFC
313	rs17650886	4 (169736977)	A (0.07)	2240	1.58 (0.11)	4.65315e-05	2121	1.04 (0.11)	0.762	4361	1.28 (0.08)	0.001749		PALLD,DDX60L
314	rs12644125	4 (179782934)	A (0.33)	2238	1.26 (0.06)	0.000404225	2119	0.95 (0.06)	0.4522	4357	1.1 (0.05)	0.04433
315	rs4861861	4 (181751048)	C (0.35)	2239	1.26 (0.06)	0.00035445	2121	0.91 (0.06)	0.1273	4360	1.07 (0.05)	0.1346
316	rs2043893	4 (182714380)	G (0.44)	2193	1.22 (0.06)	0.00169266	2120	0.9 (0.06)	0.09407	4313	1.05 (0.04)	0.287
317	rs12643070	4 (182903462)	A (0.29)	2232	0.81 (0.07)	0.0028135	2121	1.01 (0.07)	0.8417	4353	0.9 (0.05)	0.04552
318	rs17072947	4 (183433518)	A (0.06)	2238	0.64 (0.13)	0.00079744	2118	0.93 (0.14)	0.5889	4356	0.77 (0.09)	0.005424		ODZ3
319	rs17074036	4 (183922396)	A (0.09)	2239	1.41 (0.1)	0.000647388	2115	0.97 (0.1)	0.7428	4354	1.16 (0.07)	0.0266		ODZ3
320	rs6818425	4 (186546751)	G (0.04)	2221	1.42 (0.1)	0.000868497	2115	1.24 (0.14)	0.116	4336	1.35 (0.08)	0.0004995		UFSP2,SNX25,LRP2BP,LOC441054,CCDC110,ANKRD37
321	rs4241809	4 (186818853)	G (0.2)	2238	1.25 (0.07)	0.00215232	2119	0.96 (0.07)	0.5554	4357	1.1 (0.05)	0.0738		SORBS2
322	rs7659329	4 (188831272)	T (0.23)	2240	1.3 (0.07)	0.000180161				2240	1.3 (0.07)	0.0001802
323	rs6826851	4 (188845117)	A (0.31)	2240	1.27 (0.06)	0.000271612	2121	0.92 (0.07)	0.2176	4361	1.09 (0.05)	0.08019
324	rs341260	5 (143199)	G (0.48)	2237	1.22 (0.06)	0.00106144	2108	1.05 (0.06)	0.4258	4345	1.14 (0.04)	0.003688		PLEKHG4B
325	rs10062809	5 (1700875)	A (0.08)	2239	1.34 (0.1)	0.00302001				2239	1.34 (0.1)	0.00302
326	rs10072352	5 (2212490)	A (0.13)	2240	1.37 (0.09)	0.000823429	2118	1.02 (0.09)	0.7922	4358	1.18 (0.06)	0.009832
327	rs7719640	5 (3805812)	A (0.45)	2238	1.22 (0.06)	0.00129339	2120	0.96 (0.06)	0.5172	4358	1.08 (0.04)	0.06375
328	rs17831594	5 (6398055)	A (0.07)	2239	1.46 (0.11)	0.001142	2119	0.95 (0.12)	0.6572	4358	1.19 (0.08)	0.04315		MED10,FLJ33360
329	rs268489	5 (9448673)	G (0.49)	2239	1.26 (0.06)	0.000268504	2121	0.99 (0.06)	0.8103	4360	1.11 (0.04)	0.01453		SEMA5A
330	rs268532	5 (9494720)	G (0.33)	2232	1.23 (0.07)	0.00261145	2115	1.02 (0.07)	0.7522	4347	1.12 (0.05)	0.01745		SEMA5A
331	rs6885069	5 (15741448)	A (0.24)	2240	0.81 (0.07)	0.00318897	2113	1.02 (0.07)	0.7519	4353	0.91 (0.05)	0.05807		FBXL7
332	rs431154	5 (16585183)	A (0.04)	2239	1.46 (0.13)	0.00548414	2119	1.01 (0.16)	0.9309	4358	1.25 (0.1)	0.04026		MYO10,FAM134B
333	rs3817264	5 (34867815)	A (0.31)	2205	0.81 (0.07)	0.00149333	2116	1.08 (0.07)	0.2388	4321	0.93 (0.05)	0.1486		TTC23L,RAI14,RAD1,DNAJC21,BXDC2
334	rs358503	5 (39140588)	C (0.24)	2230	1.23 (0.07)	0.0025032	2117	0.94 (0.07)	0.3877	4347	1.08 (0.05)	0.1182		RICTOR,FYB
335	rs271255	5 (53193850)	A (0.03)	2175	0.45 (0.23)	0.000572098				2175	0.45 (0.23)	0.0005721		ARL15
336	rs36000196	5 (54210042)	G (0.12)	2240	1.27 (0.08)	0.00495864	2120	0.97 (0.09)	0.7276	4360	1.12 (0.06)	0.07656		ESM1
337	rs27006	5 (55603338)	A (0.36)	2240	0.82 (0.06)	0.0018908	2097	0.91 (0.06)	0.1171	4337	0.86 (0.04)	0.0008922		ANKRD55
338	rs6890270	5 (56296363)	G (0.32)	2240	0.81 (0.07)	0.00224661	2120	0.95 (0.07)	0.4734	4360	0.88 (0.05)	0.007144		MIER3,MAP3K1,C5orf35
339	rs12658182	5 (56830076)	A (0.12)	2201	0.76 (0.09)	0.00175058	2121	1.02 (0.09)	0.8189	4322	0.87 (0.06)	0.03818		ACTBL2
340	rs13357378	5 (56886467)	G (0.03)	2240	0.57 (0.16)	0.000518207	2120	1.1 (0.17)	0.5646	4360	0.78 (0.12)	0.03695		ACTBL2
341	rs7734050	5 (57209662)	A (0.46)	2240	0.83 (0.06)	0.0016365	2121	1.01 (0.06)	0.8988	4361	0.91 (0.04)	0.03013
342	rs17281333	5 (58009297)	G (0.05)	2240	0.67 (0.13)	0.00198772	2121	0.75 (0.15)	0.05632	4361	0.7 (0.1)	0.0003896		RAB3C
343	rs4260622	5 (62677754)	G (0.12)	2239	0.72 (0.1)	0.00082931				2239	0.72 (0.1)	0.0008293
344	rs1363952	5 (64352822)	A (0.22)	2240	1.27 (0.07)	0.00100714	2120	0.95 (0.07)	0.5054	4360	1.11 (0.05)	0.0584		SDCCAG10
345	rs253414	5 (74992273)	G (0.36)	2240	0.81 (0.06)	0.0010839	2115	1.08 (0.06)	0.2209	4355	0.94 (0.05)	0.1361		POLK,C5orf37
346	rs2937720	5 (75599937)	A (0.48)	2238	0.82 (0.06)	0.00106888	2116	1.04 (0.06)	0.5521	4354	0.92 (0.04)	0.05347		SV2C
347	rs17568237	5 (76009201)	A (0.34)	2240	0.81 (0.07)	0.00179221	2120	0.88 (0.07)	0.05767	4360	0.84 (0.05)	0.0003682		IQGAP2,F2RL2,F2R
348	rs1479561	5 (76503740)	A (0.33)	2240	0.77 (0.07)	0.000243869	2120	0.85 (0.07)	0.02005	4360	0.81 (0.05)	2.127e-05		ZBED3,PDE8B
349	rs963913	5 (76506179)	G (0.49)	2240	1.27 (0.06)	0.000145322	2120	1.05 (0.06)	0.391	4360	1.16 (0.04)	0.0008966		ZBED3,PDE8B
350	rs6881736	5 (77179822)	G (0.34)	2240	1.21 (0.06)	0.00306884	2121	0.96 (0.06)	0.5315	4361	1.08 (0.04)	0.09188		TBCA
351	rs10060355	5 (77223232)	A (0.43)	2239	1.23 (0.06)	0.000763971				2239	1.23 (0.06)	0.000764
352	rs876605	5 (77837115)	G (0.36)	2239	1.23 (0.06)	0.000993106	2120	1.01 (0.07)	0.9082	4359	1.12 (0.05)	0.01468		SCAMP1,LHFPL2
353	rs1470025	5 (79458185)	A (0.49)	2240	1.21 (0.06)	0.00201432	2119	0.99 (0.06)	0.8959	4359	1.1 (0.04)	0.0338		THBS4,SERINC5
354	rs7715906	5 (81140968)	G (0.02)	2239	1.74 (0.18)	0.0025032	2120	1.29 (0.19)	0.1751	4359	1.51 (0.13)	0.001857		SSBP2
355	rs1346452	5 (88422883)	G (0.38)	2219	1.21 (0.06)	0.00288705	2119	1.03 (0.06)	0.6096	4338	1.12 (0.04)	0.01285
356	rs12513551	5 (92541636)	A (0.48)	2240	1.23 (0.06)	0.00097925	2120	0.97 (0.06)	0.6347	4360	1.09 (0.04)	0.04221
357	rs4541642	5 (92614692)	G (0.37)	2234	1.27 (0.06)	0.000209632	2120	1.1 (0.06)	0.1436	4354	1.18 (0.04)	0.000237
358	rs4607342	5 (93203283)	A (0.02)	2239	1.75 (0.18)	0.00164204	2120	1.08 (0.18)	0.6663	4359	1.39 (0.13)	0.01055		FAM172A
359	rs11241621	5 (97849352)	A (0.13)	2227	1.3 (0.09)	0.00390512	2120	0.89 (0.09)	0.1604	4347	1.07 (0.06)	0.2778
360	rs4311468	5 (111635408)	A (0.41)	2237	1.21 (0.06)	0.00192903	2119	1.02 (0.06)	0.7712	4356	1.11 (0.04)	0.01531		EPB41L4A
361	rs10071986	5 (111780700)	A (0.02)	2240	1.92 (0.2)	0.00118233	2120	1.07 (0.21)	0.7273	4360	1.45 (0.14)	0.01024		EPB41L4A
362	rs1864067	5 (113025555)	A (0.24)	2234	1.23 (0.07)	0.00263703	2118	0.95 (0.07)	0.4977	4352	1.09 (0.05)	0.09267		YTHDC2
363	rs10519361	5 (113050968)	A (0.07)	2240	1.46 (0.11)	0.000450337	2106	0.92 (0.11)	0.4618	4346	1.16 (0.08)	0.04478		YTHDC2
364	rs17136136	5 (113324058)	G (0.43)	2239	0.82 (0.06)	0.00125823	2120	0.91 (0.06)	0.1247	4359	0.86 (0.04)	0.0007188
365	rs17101788	5 (143683000)	A (0.03)	2239	1.9 (0.2)	0.00128895	2119	1.07 (0.23)	0.7722	4358	1.48 (0.15)	0.01212		KCTD16
366	rs282474	5 (156074495)	A (0.45)	2240	0.82 (0.06)	0.00119468	2119	1.02 (0.06)	0.7703	4359	0.91 (0.04)	0.03408		SGCD
367	rs4374747	5 (156358817)	A (0.43)	2240	1.3 (0.06)	8.27106e-05	2118	1.17 (0.06)	0.01123	4358	1.23 (0.05)	4.438e-06	rs2036402 (1)	TIMD4,HAVCR1,HAVCR2
368	rs2036402	5 (156396820)	G (0.45)	2232	1.27 (0.06)	0.000187159	2118	1.2 (0.06)	0.004788	4350	1.23 (0.04)	3.411e-06		TIMD4,HAVCR1,HAVCR2
369	rs6864876	5 (158156677)	A (0.03)	2177	0.63 (0.15)	0.00192261	2118	0.92 (0.16)	0.5914	4295	0.75 (0.11)	0.009727		EBF1
370	rs4921537	5 (158298841)	A (0.47)	2240	0.84 (0.06)	0.00298147	2120	0.96 (0.06)	0.4742	4360	0.89 (0.04)	0.008599		EBF1
371	rs5014833	5 (158974923)	A (0.1)	2188	0.71 (0.1)	0.000800289	2120	0.92 (0.1)	0.4142	4308	0.8 (0.07)	0.003055
372	rs679633	5 (160662970)	C (0.49)	2238	1.22 (0.06)	0.00157671	2120	0.85 (0.06)	0.01292	4358	1.02 (0.04)	0.5956		GABRB2
373	rs299287	5 (162825997)	G (0.45)	2237	0.82 (0.06)	0.00148319	2120	0.9 (0.06)	0.09151	4357	0.86 (0.04)	0.0005519		NUDCD2,MAT2B,HMMR,CCNG1
374	rs374694	5 (166353751)	A (0.03)	2240	1.62 (0.14)	0.000472562	2121	1.04 (0.16)	0.8205	4361	1.35 (0.1)	0.007729
375	rs11954621	5 (168612481)	A (0.34)	2236	1.24 (0.06)	0.000896625	2120	1.11 (0.06)	0.1047	4356	1.17 (0.04)	0.0004459		SLIT3
376	rs12659144	5 (173710126)	G (0.06)	2240	0.7 (0.12)	0.00307869	2119	0.85 (0.12)	0.1745	4359	0.77 (0.09)	0.002152
377	rs17064931	5 (174706891)	G (0.04)	2240	1.49 (0.13)	0.00327142	2121	1.03 (0.14)	0.854	4361	1.24 (0.1)	0.02534		DRD1
378	rs6596785	6 (1047777)	G (0.06)	2238	1.4 (0.11)	0.00302972	2116	0.8 (0.12)	0.05202	4354	1.07 (0.08)	0.4407
379	rs2816272	6 (1409678)	A (0.34)	2238	1.2 (0.06)	0.00268888	2036	1.05 (0.06)	0.4686	4274	1.13 (0.04)	0.00754		FOXF2
380	rs2745626	6 (1411547)	A (0.11)	2239	1.32 (0.09)	0.00203449	2119	0.97 (0.09)	0.745	4358	1.13 (0.06)	0.04719		FOXF2
381	rs4435987	6 (1422708)	A (0.3)	2239	1.25 (0.06)	0.000574191	2120	1.05 (0.06)	0.4581	4359	1.15 (0.05)	0.002832		FOXF2
382	rs1265235	6 (4445681)	A (0.29)	2239	0.82 (0.07)	0.00309848				2239	0.82 (0.07)	0.003098
383	rs10484845	6 (5092039)	G (0.05)	2238	1.5 (0.13)	0.0023217	2121	0.82 (0.14)	0.1633	4359	1.13 (0.1)	0.2263		LYRM4
384	rs1482873	6 (6004612)	C (0.32)	2240	0.82 (0.06)	0.00255264	2119	1.09 (0.07)	0.1978	4359	0.94 (0.05)	0.2059		NRN1,F13A1
385	rs201033	6 (6638442)	A (0.06)	2230	1.4 (0.1)	0.00127131	2115	0.99 (0.12)	0.9608	4345	1.21 (0.08)	0.02295		LY86
386	rs9392997	6 (8293309)	G (0.08)	2239	0.69 (0.11)	0.0013249	2120	1.14 (0.12)	0.2547	4359	0.88 (0.08)	0.1319		SLC35B3
387	rs7746417	6 (8739121)	A (0.45)	2238	1.26 (0.06)	0.000210451	2120	1.06 (0.06)	0.3894	4358	1.15 (0.04)	0.001129
388	rs2179179	6 (11454558)	G (0.33)	2240	0.79 (0.07)	0.000597687	2119	0.99 (0.07)	0.8842	4359	0.89 (0.05)	0.0104
389	rs9296000	6 (11491962)	G (0.46)	2239	0.82 (0.06)	0.00167563	2115	1.1 (0.06)	0.1195	4354	0.95 (0.04)	0.2427
390	rs6932716	6 (16031302)	A (0.09)	2240	0.69 (0.11)	0.0012757	2120	1 (0.12)	0.9863	4360	0.82 (0.08)	0.02162
391	rs10949323	6 (16062488)	C (0.07)	2237	0.53 (0.16)	7.78361e-05	2121	0.85 (0.16)	0.3066	4358	0.68 (0.11)	0.0003942
392	rs12524744	6 (18223099)	A (0.21)	2161	0.75 (0.08)	0.000481379	2119	1.07 (0.08)	0.3963	4280	0.9 (0.06)	0.05961		TPMT,NHLRC1,AOF1
393	rs9383432	6 (18809568)	G (0.31)	2233	1.23 (0.07)	0.00171561	2119	1.04 (0.07)	0.594	4352	1.13 (0.05)	0.008846
394	rs1033819	6 (18859349)	G (0.44)	2239	0.83 (0.06)	0.00164204	2114	1.06 (0.06)	0.3823	4353	0.93 (0.04)	0.09913
395	rs9297091	6 (18875804)	A (0.05)	2240	1.66 (0.15)	0.00117823	2119	0.91 (0.19)	0.5954	4359	1.3 (0.12)	0.05055
396	rs2782185	6 (20064822)	G (0.3)	2240	1.23 (0.06)	0.00179823	2121	0.94 (0.07)	0.3087	4361	1.07 (0.05)	0.1267
397	rs9348453	6 (21114641)	G (0.32)	2240	0.8 (0.07)	0.00136177	2121	1.07 (0.07)	0.3223	4361	0.93 (0.05)	0.1085		CDKAL1
398	rs9358604	6 (23033510)	C (0.49)	2238	1.22 (0.06)	0.00121973	2121	0.96 (0.06)	0.5481	4359	1.09 (0.04)	0.05763
399	rs2256902	6 (30048351)	A (0.26)	2237	0.8 (0.07)	0.00173302	2121	0.96 (0.07)	0.5391	4358	0.88 (0.05)	0.007522		ZNRD1,RNF39,PPP1R11,HLA-A,HLA-A29.1,HCG9
400	rs2844795	6 (30181826)	G (0.37)	2240	1.25 (0.06)	0.00042909	2082	1.04 (0.06)	0.519	4322	1.14 (0.05)	0.002856		ZNRD1,TRIM40,TRIM31,TRIM26,TRIM15,TRIM10,RNF39,PPP1R11,HLA-A29.1
401	rs6924282	6 (30393862)	G (0.4)	2240	1.25 (0.06)	0.000297718	2121	0.95 (0.06)	0.3969	4361	1.1 (0.04)	0.04532		TRIM39,RPP21,FLJ45422
402	rs4711279	6 (31802465)	C (0.26)	2238	0.84 (0.07)	0.0170245	2119	0.93 (0.07)	0.3231	4357	0.89 (0.05)	0.01643		ZBTB12,VARS,SLC44A4,NEU1,MSH5,LSM2,HSPA1B,HSPA1L,HSPA1A,EHMT2,CLIC1,C6orf48,C6orf26,C6orf27,C2
403	rs117821	6 (32906689)	A (0.42)	2238	1.22 (0.06)	0.00137114				2238	1.22 (0.06)	0.001371		TAP2,TAP1,PSMB9,PSMB8,HLA-DQA2,HLA-DOB
404	rs2071535	6 (32932165)	A (0.15)	2180	0.71 (0.09)	0.000198484	2120	0.87 (0.09)	0.1139	4300	0.79 (0.06)	0.0001703		TAP2,TAP1,PSMB9,PSMB8,HLA-DOB,HLA-DMA,HLA-DMB
405	rs3129294	6 (33084671)	C (0.2)	2240	1.23 (0.07)	0.00532884	2117	0.99 (0.08)	0.8824	4357	1.11 (0.05)	0.05812		SLC39A7,RXRB,RING1,HSD17B8,HLA-DPA1,HLA-DPB1,COL11A2
406	rs4259245	6 (33732199)	G (0.33)	2240	1.27 (0.06)	0.000161127	2118	0.99 (0.07)	0.9137	4358	1.13 (0.05)	0.008548		ITPR3,IHPK3,FLJ43752,C6orf125,BAK1
407	rs9296097	6 (33768121)	A (0.14)	2229	1.4 (0.08)	8.76943e-05	2095	0.94 (0.09)	0.4866	2229	1.4 (0.08)	8.769e-05		LEMD2,ITPR3,IHPK3,FLJ43752,C6orf125
408	rs11753213	6 (33927560)	G (0.17)	2238	1.26 (0.07)	0.00215944	2105	0.98 (0.07)	0.7772	4343	1.11 (0.05)	0.04497		MLN,LEMD2
409	rs9349200	6 (41792368)	G (0.04)	2238	1.62 (0.15)	0.0015345	2119	0.85 (0.16)	0.3388	4357	1.21 (0.11)	0.1088		USP49,TFEB,PRICKLE4,PGC,MDFI,FRS3
410	rs4507587	6 (43883816)	G (0.27)	2237	0.8 (0.07)	0.00126258	2119	0.98 (0.07)	0.7839	4356	0.88 (0.05)	0.01235		VEGFA
411	rs1321516	6 (51864973)	G (0.31)	2239	0.81 (0.07)	0.00176831	2117	1.01 (0.07)	0.8448	4356	0.9 (0.05)	0.03528		PKHD1
412	rs816379	6 (54106984)	A (0.46)	2240	0.82 (0.06)	0.00122396	2119	0.99 (0.06)	0.846	4359	0.9 (0.04)	0.01416		C6orf142
413	rs7739784	6 (68213731)	A (0.38)	2212	0.83 (0.06)	0.00242275	2119	1.01 (0.06)	0.87	4331	0.91 (0.04)	0.04008
414	rs6911553	6 (68287535)	A (0.08)	2240	0.72 (0.11)	0.00359819	2121	1.13 (0.11)	0.247	4361	0.91 (0.08)	0.2008
415	rs9341865	6 (82016826)	A (0.41)	2238	0.82 (0.06)	0.00204126	2120	0.97 (0.07)	0.6757	4358	0.89 (0.05)	0.01235
416	rs595890	6 (85897122)	C (0.28)	2238	0.8 (0.07)	0.00110681	2118	1.08 (0.07)	0.2866	4356	0.92 (0.05)	0.1107
417	rs476014	6 (87521323)	A (0.3)	2240	0.8 (0.07)	0.000734441	2121	0.94 (0.07)	0.3839	4361	0.86 (0.05)	0.002469
418	rs292258	6 (90699621)	C (0.43)	2237	1.19 (0.06)	0.00404198	2121	1.06 (0.06)	0.3424	4358	1.12 (0.04)	0.006487		GJA10,CASP8AP2,BACH2
419	rs9444758	6 (91117874)	C (0.11)	2240	0.72 (0.11)	0.00367859	2118	0.82 (0.13)	0.1163	4358	0.76 (0.08)	0.001487		BACH2
420	rs9362780	6 (91520158)	G (0.5)	2238	0.8 (0.06)	0.000262387	2115	1.01 (0.06)	0.8263	4353	0.9 (0.04)	0.01374
421	rs6568649	6 (97439526)	G (0.11)	2240	0.71 (0.11)	0.00328186	2121	0.84 (0.12)	0.1652	4361	0.77 (0.08)	0.002106		KLHL32,GPR63,C6orf66
422	rs9320409	6 (97637567)	G (0.29)	2239	0.8 (0.07)	0.00137114	2116	1.07 (0.07)	0.3426	4355	0.92 (0.05)	0.1024		KLHL32,C6orf167
423	rs3104095	6 (98990159)	A (0.2)	2239	0.8 (0.07)	0.00275054	2120	0.93 (0.08)	0.3193	4359	0.86 (0.05)	0.004504
424	rs6936552	6 (102144377)	G (0.15)	2239	1.28 (0.08)	0.00225402				2239	1.28 (0.08)	0.002254		GRIK2
425	rs4945751	6 (106950516)	A (0.49)	2237	0.82 (0.06)	0.00162548	2114	1.01 (0.06)	0.8294	4351	0.91 (0.04)	0.03491		ATG5
426	rs4946239	6 (117509381)	G (0.05)	2240	0.64 (0.13)	0.000670778	2119	0.9 (0.14)	0.4508	4359	0.75 (0.09)	0.003037		VGLL2
427	rs6931122	6 (120395920)	G (0.01)	2239	0.19 (0.49)	0.000832265	2121	1.11 (0.4)	0.7946	4360	0.54 (0.31)	0.02688
428	rs4895858	6 (130159096)	G (0.24)	2240	1.24 (0.07)	0.00192903	2113	0.93 (0.07)	0.325	4353	1.08 (0.05)	0.1239		C6orf191,ARHGAP18
429	rs1000025	6 (134127012)	A (0.19)	2190	0.79 (0.08)	0.0027684	2119	1.03 (0.08)	0.7024	4309	0.9 (0.06)	0.06213
430	rs229908	6 (134359423)	G (0.22)	2237	0.78 (0.07)	0.000753107	2119	0.92 (0.08)	0.297	4356	0.85 (0.05)	0.001678		TBPL1,SLC2A12
431	rs13216187	6 (134669293)	G (0.37)	2236	1.21 (0.06)	0.00244663	2120	0.94 (0.06)	0.3139	4356	1.07 (0.05)	0.142
432	rs7762107	6 (141252704)	A (0.05)	2237	1.5 (0.13)	0.00176831				2237	1.5 (0.13)	0.001768
433	rs9377061	6 (147968724)	A (0.49)	2225	1.23 (0.06)	0.000613102	2116	0.88 (0.06)	0.03566	4341	1.04 (0.04)	0.3242		SAMD5
434	rs3915135	6 (148292936)	A (0.14)	2240	1.28 (0.08)	0.00177426	2120	1.04 (0.09)	0.6936	4360	1.17 (0.06)	0.0119
435	rs1881826	6 (148383451)	G (0.45)	2218	1.23 (0.06)	0.00102136	2110	0.92 (0.06)	0.1911	4328	1.07 (0.05)	0.1503
436	rs7740233	6 (150915459)	G (0.46)	2240	1.29 (0.06)	3.55581e-05	2114	1.06 (0.06)	0.3247	4354	1.17 (0.04)	0.0002604		PLEKHG1
437	rs9397336	6 (150932855)	A (0.32)	2239	0.79 (0.06)	0.000244812	2121	1.04 (0.07)	0.5113	4360	0.9 (0.05)	0.03		PLEKHG1
438	rs9372073	6 (150934342)	G (0.27)	2236	1.34 (0.07)	2.7548e-05	2118	1.07 (0.07)	0.3434	4354	1.19 (0.05)	0.0002468	rs10457082 (0.8)	PLEKHG1
439	rs10457082	6 (150938880)	A (0.27)	2237	1.34 (0.07)	2.67206e-05	2118	1.07 (0.07)	0.3234	4355	1.19 (0.05)	0.0002168		PLEKHG1
440	rs1492575	6 (150950468)	G (0.24)	2240	1.32 (0.07)	0.0001402	2119	0.95 (0.08)	0.465	4359	1.13 (0.05)	0.0264		PLEKHG1
441	rs7750629	6 (150957574)	G (0.28)	2238	0.81 (0.06)	0.00117823	2119	1.07 (0.07)	0.3261	4357	0.93 (0.05)	0.101		PLEKHG1
442	rs9479472	6 (153338465)	G (0.11)	2240	1.49 (0.1)	4.12185e-05	2029	0.89 (0.11)	0.2782	4269	1.18 (0.07)	0.02623		RGS17,MTRF1L,FBXO5
443	rs2207609	6 (153343307)	G (0.39)	2240	1.25 (0.06)	0.000311636	2118	0.99 (0.06)	0.8721	4358	1.12 (0.04)	0.01341		RGS17,MTRF1L,FBXO5
444	rs9384060	6 (153349176)	A (0.1)	2239	1.49 (0.1)	8.73355e-05	2120	0.87 (0.11)	0.2065	4359	1.16 (0.07)	0.0535	rs9479472 (0.9)	RGS17,MTRF1L,FBXO5
445	rs1292830	6 (153395152)	C (0.3)	2239	1.28 (0.07)	0.000201611	2119	1.07 (0.07)	0.3474	4358	1.17 (0.05)	0.0009019		RGS17,MTRF1L,FBXO5
446	rs11155980	6 (154865760)	A (0.04)	2240	1.46 (0.12)	0.0022099	2119	1.02 (0.12)	0.8901	4359	1.22 (0.09)	0.02201		CNKSR3
447	rs12199778	6 (155865681)	G (0.49)	2240	0.82 (0.06)	0.00139959	2121	0.97 (0.06)	0.6123	4361	0.89 (0.04)	0.008216		NOX3
448	rs9480255	6 (156452530)	A (0.11)	2237	1.37 (0.08)	0.000121852	2119	0.92 (0.08)	0.3019	4356	1.13 (0.06)	0.042
449	rs11969174	6 (166896002)	A (0.01)	2188	0.26 (0.39)	0.00084119	2117	0.86 (0.32)	0.6412	4305	0.54 (0.25)	0.006787		RPS6KA2
450	rs4710187	6 (167475082)	A (0.22)	2240	0.78 (0.08)	0.0011341	2117	1 (0.08)	0.9924	4357	0.88 (0.06)	0.01995		GPR31,CCR6
451	rs2343389	6 (169145714)	A (0.23)	2240	0.78 (0.07)	0.000705975	2116	0.98 (0.07)	0.7762	4356	0.87 (0.05)	0.008611
452	rs13203299	6 (169184034)	G (0.23)	2239	1.26 (0.07)	0.00175058	2045	0.85 (0.07)	0.0246	4284	1.04 (0.05)	0.478
453	rs17333262	7 (8558628)	A (0.5)	2220	0.82 (0.06)	0.00137584	2110	1.08 (0.06)	0.201	4330	0.94 (0.04)	0.162		NXPH1
454	rs2189945	7 (10264689)	G (0.36)	2240	0.81 (0.06)	0.000884021	2119	0.94 (0.07)	0.3832	4359	0.87 (0.05)	0.002776
455	rs10952197	7 (10268547)	G (0.32)	2240	1.23 (0.06)	0.00105404	2119	1.05 (0.06)	0.478	4359	1.14 (0.04)	0.004471
456	rs1990603	7 (12088267)	G (0.29)	2240	1.22 (0.06)	0.00256097	2120	0.92 (0.07)	0.222	4360	1.07 (0.05)	0.1901
457	rs10258251	7 (12988230)	C (0.47)	2239	0.82 (0.06)	0.001162	2118	0.99 (0.06)	0.8537	4357	0.89 (0.04)	0.01401
458	rs13240692	7 (13599676)	A (0.02)	2240	0.48 (0.2)	0.000377863	2121	1.13 (0.21)	0.5721	4361	0.72 (0.15)	0.03125
459	rs7781186	7 (21169353)	A (0.05)	2237	1.42 (0.11)	0.00146811	2121	0.97 (0.12)	0.7954	4358	1.19 (0.08)	0.0359
460	rs2961283	7 (22607023)	A (0.38)	2240	0.82 (0.06)	0.00197454	2119	1.06 (0.07)	0.3844	4359	0.93 (0.05)	0.1071
461	rs6943230	7 (24481160)	G (0.05)	2238	1.44 (0.12)	0.00290571	2115	0.84 (0.12)	0.1527	4353	1.1 (0.09)	0.2551		MPP6
462	rs1100626	7 (29744776)	C (0.05)	2240	0.6 (0.16)	0.00186569	2120	1.01 (0.19)	0.9692	4360	0.74 (0.12)	0.02761		WIPF3
463	rs10274146	7 (34686172)	G (0.23)	2240	1.29 (0.07)	0.000194639	2117	1.01 (0.07)	0.9369	4357	1.14 (0.05)	0.006397		NPSR1
464	rs6947865	7 (38652793)	A (0.43)	2238	0.82 (0.06)	0.0016365	2112	0.95 (0.06)	0.4275	4350	0.88 (0.04)	0.004926		VPS41,LOC340286,AMPH
465	rs1476892	7 (44210478)	G (0.21)	2239	0.79 (0.08)	0.00178621	2121	0.94 (0.08)	0.428	4360	0.86 (0.05)	0.00525		YKT6,POLD2,MYL7,GCK,CAMK2B,AEBP1
466	rs12669795	7 (46059145)	A (0.02)	2158	0.43 (0.26)	0.001162	2118	1.08 (0.25)	0.7527	4276	0.69 (0.18)	0.03701
467	rs1030640	7 (46719405)	G (0.05)	2240	0.6 (0.15)	0.000565862	2120	1.05 (0.16)	0.7853	4360	0.77 (0.11)	0.02254
468	rs1464841	7 (46767953)	G (0.12)	2240	1.36 (0.09)	0.000565862	2100	1.11 (0.09)	0.2529	4340	1.23 (0.06)	0.001068
469	rs2214740	7 (46906589)	G (0.07)	2240	0.57 (0.15)	0.000363921	2120	0.77 (0.17)	0.1156	4360	0.65 (0.11)	0.0002597
470	rs10951902	7 (47393844)	G (0.5)	2240	0.81 (0.06)	0.000718784	2120	1.04 (0.06)	0.488	4360	0.92 (0.04)	0.05229		TNS3
471	rs334527	7 (47533752)	G (0.39)	2224	1.23 (0.06)	0.00132036	2110	1 (0.06)	0.9991	4334	1.11 (0.04)	0.02137		TNS3
472	rs7807054	7 (47565131)	A (0.37)	2203	0.79 (0.06)	0.000164346	1948	1.04 (0.07)	0.6108	4151	0.89 (0.05)	0.01655		TNS3,LOC401335
473	rs10215516	7 (65895515)	G (0.46)	2189	0.83 (0.06)	0.00182861				2189	0.83 (0.06)	0.001829		RABGEF1
474	rs17145732	7 (72608204)	C (0.12)	2240	0.69 (0.11)	0.000574836	2120	0.91 (0.1)	0.3281	4360	0.8 (0.07)	0.001633	rs2286276 (0.9)	TBL2,MLXIPL,BCL7B,BAZ1B
475	rs2286276	7 (72625290)	A (0.12)	2240	0.68 (0.09)	2.09012e-05	1824	0.79 (0.1)	0.01858	4064	0.72 (0.07)	2.18e-06		VPS37D,TBL2,MLXIPL,BCL7B,BAZ1B
476	rs6967028	7 (72679066)	G (0.05)	2239	0.58 (0.15)	0.000347826	2121	0.87 (0.16)	0.3948	4360	0.7 (0.11)	0.001596		WBSCR22,VPS37D,TBL2,STX1A,MLXIPL,DNAJC30,BCL7B
477	rs3779312	7 (77549692)	A (0.19)	2215	1.39 (0.07)	3.46637e-06	2118	1.02 (0.08)	0.7881	4333	1.22 (0.05)	0.0004546		MAGI2
478	rs12668317	7 (77772538)	A (0.42)	2240	1.25 (0.06)	0.00043069	2121	0.99 (0.06)	0.8372	4361	1.11 (0.04)	0.01732		MAGI2
479	rs2362640	7 (78052766)	C (0.49)	2236	0.81 (0.06)	0.000826365	2120	0.92 (0.06)	0.1637	4356	0.86 (0.04)	0.000759		MAGI2
480	rs12537793	7 (78454397)	G (0.19)	2237	0.79 (0.08)	0.00184707	2111	0.88 (0.08)	0.1059	4348	0.83 (0.06)	0.0007792		MAGI2
481	rs7809986	7 (78525055)	A (0.16)	2240	0.73 (0.09)	0.000382142	2121	0.88 (0.09)	0.1841	4361	0.8 (0.06)	0.0005165		MAGI2
482	rs13236689	7 (80073950)	C (0.3)	2239	0.82 (0.07)	0.00264561				2239	0.82 (0.07)	0.002646		GNAT3,CD36
483	rs2247579	7 (80552572)	G (0.35)	2240	1.23 (0.06)	0.00167563	2121	1.13 (0.06)	0.0596	4361	1.18 (0.05)	0.0003627
484	rs4096939	7 (80581838)	A (0.12)	2240	0.75 (0.09)	0.00119468	2107	0.94 (0.09)	0.5095	4347	0.84 (0.06)	0.00535
485	rs10253579	7 (82969761)	C (0.07)	2240	0.61 (0.14)	0.000892889	2110	0.81 (0.13)	0.1056	4350	0.71 (0.1)	0.0004462		SEMA3E
486	rs2888697	7 (88863737)	A (0.06)	2240	1.49 (0.13)	0.00193547	2121	0.93 (0.14)	0.6024	4361	1.2 (0.09)	0.06311		ZNF804B
487	rs7778348	7 (90408254)	C (0.35)	2236	1.23 (0.06)	0.00131583	2119	0.94 (0.06)	0.3257	4355	1.08 (0.04)	0.106		PFTK1
488	rs10488515	7 (91999978)	G (0.01)	2239	0.37 (0.33)	0.00248692	2121	1.61 (0.29)	0.1016	4360	0.84 (0.22)	0.305		PEX1,GATAD1,FAM133B,DKFZP564O0523,CDK6
489	rs424	7 (92441088)	A (0.04)	2240	0.65 (0.14)	0.00229139	2119	0.98 (0.15)	0.8917	4359	0.79 (0.1)	0.02255
490	rs17165299	7 (92826662)	G (0.04)	2239	1.52 (0.13)	0.00136177	2120	0.92 (0.13)	0.5401	4359	1.19 (0.09)	0.06176		CCDC132,CALCR
491	rs41541	7 (93533609)	A (0.09)	2223	1.38 (0.1)	0.00150352	2120	0.86 (0.1)	0.1337	4343	1.09 (0.07)	0.2213		BET1
492	rs6954768	7 (100942685)	A (0.07)	2239	1.4 (0.1)	0.000772213				2239	1.4 (0.1)	0.0007722		EMID2
493	rs13245946	7 (100961685)	A (0.07)	2240	1.49 (0.11)	0.000337469	2089	0.93 (0.11)	0.5542	4329	1.19 (0.08)	0.03018		MYLC2PL,EMID2
494	rs17152281	7 (105341758)	A (0.14)	2238	1.28 (0.08)	0.00202775	2119	1.15 (0.08)	0.07202	4357	1.21 (0.06)	0.0005274		FLJ23834,ATXN7L1
495	rs10487823	7 (105595226)	G (0.38)	2226	1.23 (0.06)	0.000887157	2119	0.97 (0.06)	0.6418	4345	1.09 (0.04)	0.03994		SYPL1,NAMPT
496	rs17139904	7 (116887539)	A (0.23)	2240	0.78 (0.08)	0.00199434	2120	1 (0.08)	0.9638	4360	0.89 (0.06)	0.02897		CFTR,ASZ1
497	rs11978545	7 (118710649)	G (0.47)	2221	1.24 (0.06)	0.000416484	2119	0.98 (0.06)	0.7031	4340	1.11 (0.04)	0.02391
498	rs3800631	7 (137052181)	A (0.24)	2239	0.81 (0.07)	0.00274165	2118	1.1 (0.08)	0.2015	4357	0.93 (0.05)	0.2089		DGKI
499	rs9642124	7 (138823427)	G (0.15)	2237	0.77 (0.09)	0.00279538	2117	1.19 (0.09)	0.05824	4354	0.94 (0.06)	0.411		LUC7L2,KLRG2,HIPK2,CLEC2L
500	rs4726915	7 (147359763)	G (0.49)	2240	0.83 (0.06)	0.00283172	2121	0.98 (0.06)	0.7342	4361	0.9 (0.04)	0.01748		CNTNAP2
501	rs7809670	7 (147415420)	G (0.42)	2233	1.21 (0.06)	0.00175648	2094	1.07 (0.06)	0.3028	4327	1.14 (0.04)	0.003033		CNTNAP2
502	rs10952803	7 (148890091)	A (0.3)	2239	0.8 (0.07)	0.0018409	2121	1.02 (0.08)	0.8015	4360	0.89 (0.05)	0.03971		ZNF783,ZNF425,ZNF398,ZNF282,ZNF212
503	rs6963048	7 (150700229)	G (0.36)	2240	1.23 (0.06)	0.00147815	2117	1.09 (0.06)	0.1661	4357	1.16 (0.05)	0.001176		WDR86,SMARCD3,RHEB,NUB1,CRYGN
504	rs7779804	7 (154914177)	G (0.39)	2240	0.83 (0.06)	0.00278636	2118	0.91 (0.06)	0.1202	4358	0.87 (0.04)	0.00125		EN2,CNPY1
505	rs89975	8 (577113)	A (0.31)	2236	1.25 (0.07)	0.000972389				2236	1.25 (0.07)	0.0009724		ERICH1,C8orf42
506	rs10111597	8 (1149361)	A (0.21)	2239	0.79 (0.08)	0.00219538	2120	0.95 (0.08)	0.5299	4359	0.86 (0.06)	0.008466
507	rs12541553	8 (1295433)	C (0.37)	2239	1.21 (0.06)	0.00188449	2118	1.02 (0.06)	0.7591	4357	1.11 (0.04)	0.01462
508	rs740237	8 (1343740)	A (0.24)	2239	0.76 (0.07)	0.000253457	2096	0.91 (0.08)	0.2096	4335	0.83 (0.05)	0.000462		DLGAP2
509	rs2040988	8 (1372933)	A (0.28)	2240	1.26 (0.07)	0.000633465	2121	0.9 (0.07)	0.1171	4361	1.07 (0.05)	0.1751		DLGAP2
510	rs7015086	8 (1431699)	A (0.32)	2190	0.81 (0.07)	0.00168696	2093	0.91 (0.07)	0.1597	4283	0.86 (0.05)	0.001244		DLGAP2
511	rs317223	8 (2133623)	C (0.45)	2240	0.82 (0.06)	0.000820503	2084	0.98 (0.06)	0.7508	4324	0.89 (0.04)	0.008574		MYOM2
512	rs2688358	8 (3872203)	G (0.14)	2240	0.71 (0.09)	0.000321251	2121	0.91 (0.1)	0.3666	4361	0.8 (0.07)	0.001337		CSMD1
513	rs17070317	8 (4290826)	A (0.38)	2235	1.23 (0.06)	0.000915844	2118	0.92 (0.06)	0.1909	4353	1.07 (0.04)	0.1434		CSMD1
514	rs10435678	8 (5065307)	A (0.48)	2239	0.83 (0.06)	0.00269761	2110	0.99 (0.06)	0.829	4349	0.9 (0.04)	0.02127
515	rs7462794	8 (10482461)	G (0.01)	2239	0.37 (0.33)	0.00243865	2121	1.23 (0.33)	0.5291	4360	0.67 (0.23)	0.0831		UNQ9391,RP1L1,C8orf74
516	rs10086770	8 (10547921)	A (0.06)	2237	0.64 (0.14)	0.00243865	2109	1.12 (0.15)	0.4674	4346	0.83 (0.1)	0.09527		SOX7,RP1L1,C8orf74
517	rs13277849	8 (14216074)	G (0.35)	2239	1.25 (0.06)	0.000734441	2117	1.16 (0.07)	0.02645	4356	1.2 (0.05)	7.248e-05		SGCZ
518	rs11990349	8 (14423903)	G (0.25)	2237	1.27 (0.07)	0.000783332	2120	0.97 (0.07)	0.7055	4357	1.11 (0.05)	0.03212		SGCZ
519	rs10100797	8 (15409462)	C (0.49)	2240	1.17 (0.06)	0.00941892	2121	1.02 (0.06)	0.761	4361	1.1 (0.04)	0.03817		TUSC3
520	rs10503562	8 (15849800)	C (0.43)	2162	0.83 (0.06)	0.00325062	2117	0.97 (0.06)	0.6852	4279	0.9 (0.05)	0.01745
521	rs17123231	8 (16462729)	G (0.07)	2240	0.68 (0.13)	0.00459684				2240	0.68 (0.13)	0.004597
522	rs4486225	8 (19357684)	A (0.24)	2240	0.8 (0.07)	0.00202775	2121	0.99 (0.08)	0.8524	4361	0.88 (0.05)	0.0192		SH2D4A,CSGALNACT1
523	rs4548199	8 (19585246)	C (0.05)	2239	0.6 (0.15)	0.000493982	2121	0.88 (0.17)	0.4642	4360	0.71 (0.11)	0.002637		CSGALNACT1
524	rs1845040	8 (19612672)	A (0.36)	2240	0.83 (0.06)	0.00242275	2121	0.93 (0.06)	0.2653	4361	0.87 (0.05)	0.003173		CSGALNACT1
525	rs28834434	8 (19774890)	A (0.12)	2240	0.9 (0.13)	0.404294	2119	0.8 (0.1)	0.02584	4359	0.84 (0.08)	0.03142		LPL,INTS10
526	rs10102717	8 (19801093)	A (0.21)	2238	0.79 (0.07)	0.00159822	2118	0.9 (0.08)	0.1903	4356	0.84 (0.05)	0.001495		LPL,INTS10
527	rs4466415	8 (19821261)	C (0.08)	2240	0.6 (0.12)	1.3382e-05	2116	0.82 (0.12)	0.09228	4356	0.7 (0.08)	1.744e-05		LPL,INTS10
	rs12678919	8 (19844222)	G (0.05)	2239	0.49 (0.14)	8.89997e-07	2107	0.57 (0.14)	6.27e-05	4346	0.53 (0.10)	2.714e-10		LPL,INTS10
528	rs297	8 (19860651)	G (0.16)	2238	0.73 (0.08)	6.51274e-05	2118	0.84 (0.08)	0.03073	4356	0.78 (0.06)	1.248e-05		LPL
529	rs10096633	8 (19875201)	A (0.07)	2240	0.55 (0.11)	2.68163e-07	2120	0.63 (0.12)	0.0001145	4360	0.59 (0.08)	1.801e-10		LPL
530	rs7841189	8 (19889656)	A (0.08)	2240	0.51 (0.14)	1.5717e-06	2098	0.63 (0.13)	0.000356	4338	0.57 (0.09)	2.96e-09	rs10096633 (0.9)	LPL
531	rs9644568	8 (19972862)	A (0.07)	2240	0.44 (0.15)	6.74473e-08	2121	0.57 (0.14)	8.21e-05	4361	0.5 (0.1)	3.715e-11		SLC18A1
532	rs1402651	8 (20921503)	A (0.15)	2239	0.71 (0.09)	5.34924e-05	2120	0.91 (0.09)	0.292	4359	0.79 (0.06)	0.0002832
533	rs13266518	8 (21317917)	A (0.21)	2240	0.76 (0.08)	0.000745054				2240	0.76 (0.08)	0.0007451
534	rs12541335	8 (22144377)	G (0.34)	2238	0.81 (0.06)	0.00168696	2090	0.81 (0.07)	0.001256	4328	0.81 (0.05)	6.797e-06		SFTPC,REEP4,POLR3D,PIWIL2,PHYHIP,LGI3,BMP1
535	rs11780097	8 (23508913)	G (0.33)	2240	0.8 (0.07)	0.00121973	2120	1.06 (0.07)	0.3889	4360	0.92 (0.05)	0.08591		SLC25A37,NKX3-1
536	rs12114260	8 (24181117)	C (0.05)	2240	0.64 (0.14)	0.00148825	2118	0.75 (0.14)	0.04403	4358	0.69 (0.1)	0.0002318		ADAM28
537	rs10111167	8 (25919909)	A (0.44)	2213	0.8 (0.06)	0.000599867	2117	0.9 (0.06)	0.1105	4330	0.85 (0.04)	0.000358		EBF2
538	rs6980493	8 (26914356)	A (0.38)	2226	0.8 (0.06)	0.000396735	2074	0.96 (0.07)	0.5845	4300	0.87 (0.05)	0.003407
539	rs2874779	8 (26948131)	A (0.15)	2240	0.75 (0.09)	0.0017214	2121	0.91 (0.09)	0.306	4361	0.82 (0.07)	0.003073
540	rs1048887	8 (27649069)	G (0.39)	2240	0.79 (0.06)	0.000267475	2118	0.96 (0.06)	0.4778	4358	0.87 (0.04)	0.001883	rs7016934 (0.9)	SCARA3,PBK,ESCO2,CCDC25
541	rs7016934	8 (27660674)	A (0.37)	2240	0.75 (0.07)	2.40906e-05	2118	0.95 (0.06)	0.4419	4358	0.85 (0.05)	0.0003655		SCARA3,PBK,ESCO2,CCDC25
542	rs6983695	8 (38691579)	G (0.44)	2240	1.21 (0.06)	0.00155547	2120	0.87 (0.06)	0.02122	4360	1.03 (0.04)	0.5084		TACC1
543	rs4873659	8 (53612101)	A (0.14)	2239	1.33 (0.08)	0.000826365	2095	0.96 (0.08)	0.6128	4334	1.13 (0.06)	0.04022		RB1CC1,FAM150A
544	rs648531	8 (54014223)	A (0.43)	2239	1.22 (0.06)	0.0013853	2109	1.02 (0.06)	0.7876	4348	1.12 (0.04)	0.01305		NPBWR1
545	rs16921571	8 (56375314)	A (0.4)	2231	1.21 (0.06)	0.00204804	2121	0.97 (0.06)	0.6438	4352	1.09 (0.04)	0.05947		XKR4
546	rs2658927	8 (56514735)	A (0.35)	2238	1.24 (0.06)	0.000772213	2119	1.03 (0.06)	0.6685	4357	1.13 (0.05)	0.006757		XKR4
547	rs4237024	8 (59049005)	A (0.06)	2195	0.67 (0.13)	0.00236785	2114	0.8 (0.15)	0.1365	4309	0.72 (0.1)	0.001316		FAM110B
548	rs7840002	8 (66059972)	G (0.35)	2238	0.81 (0.06)	0.00100714	2120	1.05 (0.07)	0.4362	4358	0.92 (0.05)	0.06975
549	rs13257282	8 (77666920)	A (0.04)	2230	1.55 (0.13)	0.00117823	2121	0.88 (0.15)	0.3848	4351	1.21 (0.1)	0.08622		ZFHX4
550	rs17525603	8 (80750962)	A (0.04)	2231	1.55 (0.14)	0.0022172	2118	0.95 (0.16)	0.7626	4349	1.25 (0.11)	0.04765		STMN2,HEY1
551	rs559606	8 (93521638)	C (0.05)	2240	1.6 (0.15)	0.0018409				2240	1.6 (0.15)	0.001841
552	rs4078084	8 (106366991)	G (0.32)	2238	0.81 (0.07)	0.00179823	2115	1.07 (0.07)	0.3053	4353	0.93 (0.05)	0.1276		ZFPM2
553	rs9969592	8 (122094740)	G (0.08)	2239	1.49 (0.1)	8.45152e-05	2107	0.9 (0.1)	0.3304	4346	1.17 (0.07)	0.03203
554	rs729005	8 (126741495)	G (0.11)	2240	1.31 (0.08)	0.00141402	2113	0.97 (0.08)	0.6574	4353	1.11 (0.06)	0.04763
555	rs2385226	8 (126751178)	G (0.37)	2239	1.26 (0.06)	0.000237361	2119	0.95 (0.06)	0.4089	4358	1.09 (0.04)	0.03953
556	rs16901359	8 (127473452)	C (0.23)	2239	0.8 (0.07)	0.00219538	2121	1.04 (0.07)	0.5431	4360	0.91 (0.05)	0.07666
557	rs6983185	8 (131587082)	G (0.2)	2239	0.73 (0.08)	8.38236e-05	2119	1.03 (0.08)	0.6949	4358	0.86 (0.06)	0.0109
558	rs4512389	8 (131598440)	G (0.17)	2239	0.79 (0.08)	0.00219538	2118	1.13 (0.08)	0.1077	4357	0.94 (0.05)	0.2829
559	rs4380914	8 (132380661)	A (0.23)	2231	0.78 (0.07)	0.000811783	2000	0.92 (0.07)	0.2584	4231	0.85 (0.05)	0.001333
560	rs2255417	8 (137593333)	A (0.22)	2240	0.75 (0.08)	0.000184968	2121	0.94 (0.08)	0.472	4361	0.84 (0.06)	0.001467
561	rs11780634	8 (138190860)	A (0.24)	2239	0.77 (0.08)	0.00081468	2120	0.95 (0.08)	0.5171	4359	0.85 (0.06)	0.004357
562	rs340708	8 (139450728)	A (0.38)	2235	0.79 (0.06)	0.000184968	2117	1.09 (0.07)	0.1768	4352	0.92 (0.05)	0.08235		FAM135B
563	rs7837068	8 (139468806)	G (0.12)	2235	0.73 (0.1)	0.00116604	2057	1.12 (0.11)	0.2767	4292	0.89 (0.07)	0.1118		FAM135B
564	rs6986041	8 (139988449)	A (0.47)	2238	1.21 (0.06)	0.00197454	2120	1.09 (0.06)	0.1715	4358	1.15 (0.04)	0.001519		COL22A1
565	rs12549400	8 (141088083)	C (0.45)	2240	0.82 (0.06)	0.00159281	2114	1.03 (0.06)	0.6057	4354	0.92 (0.04)	0.0568		NIBP
566	rs6578069	8 (141182422)	A (0.47)	2214	0.8 (0.06)	0.000324927	2119	1.03 (0.06)	0.6686	4333	0.9 (0.04)	0.0232		NIBP
567	rs1567466	8 (142107091)	G (0.31)	2240	0.81 (0.07)	0.00179221	2120	1.04 (0.07)	0.5277	4360	0.92 (0.05)	0.0722		PTK2
568	rs170089	8 (142231139)	A (0.25)	2236	0.8 (0.07)	0.00223922	2111	1.02 (0.07)	0.8082	4347	0.9 (0.05)	0.04308		SLC45A4,DENND3
569	rs12155758	8 (143762887)	A (0.42)	2236	0.83 (0.06)	0.00330283	2057	0.87 (0.06)	0.02609	4293	0.85 (0.04)	0.0002518		SLURP1,PSCA,LYNX1,LYPD2,LY6K,JRK,C8orf55,ARC
570	rs1036385	8 (143839903)	G (0.29)	2239	1.26 (0.07)	0.00049035	2119	1.11 (0.07)	0.1147	4358	1.18 (0.05)	0.0003199		SLURP1,PSCA,LYNX1,LYPD2,LY6K,LY6D,JRK,GML,C8orf55
571	rs7011901	8 (144002287)	A (0.18)	2239	0.72 (0.09)	0.000192366	2121	0.88 (0.08)	0.1172	4360	0.8 (0.06)	0.0001667		GML,CYP11B2,CYP11B1
572	rs10960475	9 (1208816)	G (0.29)	2238	1.24 (0.07)	0.00139005	2078	1.03 (0.07)	0.6924	4316	1.13 (0.05)	0.009983
573	rs497374	9 (4009224)	A (0.04)	2239	1.49 (0.13)	0.00252781	2119	0.92 (0.13)	0.5268	4358	1.18 (0.09)	0.08483		GLIS3
574	rs7028492	9 (4070755)	A (0.09)	2240	0.68 (0.12)	0.00138056	2114	1.03 (0.12)	0.8208	4354	0.83 (0.09)	0.03264		GLIS3
575	rs10815303	9 (5891100)	A (0.16)	2240	0.72 (0.08)	8.80557e-05	2118	0.89 (0.08)	0.1864	4358	0.8 (0.06)	0.0001896		MLANA,KIAA2026,ERMP1
576	rs10124250	9 (6151686)	A (0.32)	2237	0.82 (0.06)	0.00157671	2117	0.89 (0.07)	0.08914	4354	0.85 (0.05)	0.0005595		IL33
577	rs820501	9 (6691530)	A (0.42)	2228	1.22 (0.06)	0.000783332	2110	1 (0.06)	0.9922	4338	1.11 (0.04)	0.01579		JMJD2C,GLDC
578	rs4742299	9 (7055141)	G (0.35)	2239	1.25 (0.06)	0.000563798	2114	1.05 (0.07)	0.4267	4353	1.15 (0.05)	0.002469		JMJD2C
579	rs4742301	9 (7055665)	G (0.1)	2237	0.72 (0.1)	0.00182861	2121	1.05 (0.11)	0.6674	4358	0.86 (0.07)	0.05321		JMJD2C
580	rs12341169	9 (7124421)	A (0.25)	2228	0.79 (0.07)	0.00116604	2121	1.04 (0.07)	0.5806	4349	0.9 (0.05)	0.05259		JMJD2C
581	rs1781265	9 (8234354)	A (0.2)	2227	0.77 (0.08)	0.00236785	2117	1.02 (0.08)	0.8254	4344	0.89 (0.06)	0.04313		PTPRD
582	rs10739174	9 (8863866)	G (0.35)	2240	1.22 (0.06)	0.00194193	2114	1.08 (0.06)	0.231	4354	1.15 (0.04)	0.002233		PTPRD
583	rs1768869	9 (9784545)	G (0.43)	2226	1.25 (0.06)	0.000267475	2120	1.03 (0.06)	0.6571	4346	1.13 (0.04)	0.003516		PTPRD
584	rs10491919	9 (9792010)	G (0.43)	2225	1.22 (0.06)	0.00212405	2119	1.04 (0.06)	0.5587	4344	1.13 (0.05)	0.009128		PTPRD
585	rs17327373	9 (15284331)	A (0.4)	2215	0.79 (0.06)	0.000278996	2120	0.98 (0.06)	0.7199	4335	0.88 (0.04)	0.004393		TTC39B
586	rs1411251	9 (17986416)	G (0.35)	2238	1.23 (0.06)	0.0014433	2117	1.04 (0.06)	0.5649	4355	1.13 (0.05)	0.00725
587	rs1944757	9 (18191083)	G (0.31)	2240	0.79 (0.07)	0.000357132	2109	0.96 (0.07)	0.5755	4349	0.86 (0.05)	0.003157
588	rs1340043	9 (18448068)	A (0.41)	2239	1.27 (0.06)	0.000117041	2118	0.86 (0.06)	0.01782	4357	1.05 (0.04)	0.2672		ADAMTSL1
589	rs7875881	9 (18572065)	G (0.39)	2239	1.22 (0.06)	0.00158743	2120	1.05 (0.06)	0.4827	4359	1.13 (0.04)	0.005905		ADAMTSL1
590	rs7022613	9 (19041208)	G (0.4)	2238	1.22 (0.06)	0.0013249	2120	1.09 (0.06)	0.1585	4358	1.15 (0.04)	0.001023		RRAGA,FAM29A,FAM154A,ADFP
591	rs9695394	9 (19126366)	A (0.21)	2239	1.29 (0.08)	0.00142859	2119	0.98 (0.08)	0.7939	4358	1.12 (0.06)	0.03542		RRAGA,FAM29A,ADFP
592	rs4977333	9 (19832235)	C (0.22)	2240	1.26 (0.07)	0.00136645	2121	0.97 (0.07)	0.6862	4361	1.1 (0.05)	0.04413		SLC24A2
593	rs216364	9 (33808257)	G (0.28)	2240	0.82 (0.07)	0.00309848	2115	0.89 (0.07)	0.08597	4355	0.85 (0.05)	0.0009071		UBE2R2,PRSS3
594	rs11547035	9 (34449025)	A (0.03)	2238	0.61 (0.17)	0.00344217	2095	1.08 (0.16)	0.6285	4333	0.82 (0.12)	0.07742		KIAA1161,DNAI1,CNTFR,C9orf24,C9orf25,C9orf165
595	rs3780168	9 (36979365)	A (0.15)	2240	1.28 (0.09)	0.00500446	2118	1.03 (0.09)	0.738	4358	1.15 (0.06)	0.02474		PAX5
596	rs2991695	9 (71238297)	A (0.1)	2240	0.72 (0.1)	0.00240695	2116	0.86 (0.11)	0.1683	4356	0.78 (0.08)	0.00171		C9orf61,APBA1
597	rs12351775	9 (72445374)	A (0.02)	2240	2.21 (0.22)	0.000277305	2119	0.92 (0.25)	0.7345	4359	1.52 (0.16)	0.0178		TRPM3
598	rs2094372	9 (77186279)	C (0.15)	2225	1.26 (0.08)	0.00273279	2118	0.98 (0.08)	0.8103	4343	1.12 (0.06)	0.04804
599	rs10867418	9 (81544344)	G (0.39)	2221	1.26 (0.06)	0.000204784	2120	1.02 (0.06)	0.7357	4341	1.13 (0.04)	0.003831		TLE4
600	rs3780416	9 (99714386)	G (0.09)	2239	1.33 (0.09)	0.00223186	2115	1.02 (0.1)	0.8073	4354	1.18 (0.07)	0.01815		HEMGN,FOXE1,C9orf156,ANP32B
601	rs944761	9 (100319172)	A (0.26)	2179	0.8 (0.07)	0.000948725	2103	0.94 (0.07)	0.4031	4282	0.86 (0.05)	0.003242		GABBR2
602	rs2295932	9 (100674537)	A (0.42)	2240	0.82 (0.06)	0.00158743	2121	0.95 (0.06)	0.454	4361	0.88 (0.04)	0.005342		GALNT12,COL15A1,ANKS6
603	rs2900223	9 (101636142)	G (0.37)	2240	1.2 (0.06)	0.00327142	2117	1.06 (0.06)	0.3262	4357	1.13 (0.04)	0.00522		STX17,NR4A3
604	rs1337706	9 (103595137)	G (0.14)	2240	0.74 (0.09)	0.00116604				2240	0.74 (0.09)	0.001166		GRIN3A
605	rs11789634	9 (103713366)	A (0.16)	2240	0.77 (0.09)	0.00332393	2099	0.93 (0.09)	0.4365	4339	0.84 (0.06)	0.008031
606	rs7025066	9 (105714063)	G (0.07)	2240	0.69 (0.12)	0.00266284	2120	0.93 (0.13)	0.6127	4360	0.79 (0.09)	0.0122
607	rs1819730	9 (109271684)	G (0.09)	2239	0.71 (0.11)	0.00242275	2113	0.8 (0.11)	0.04986	4352	0.75 (0.08)	0.0003973		KLF4
608	rs7847354	9 (111959109)	A (0.42)	2240	0.82 (0.06)	0.00160363	2119	0.96 (0.06)	0.5399	4359	0.89 (0.04)	0.007162		TXN,PALM2-AKAP2,C9orf152,AKAP2
609	rs7875641	9 (113875650)	A (0.25)	2189	0.8 (0.07)	0.00137584	2116	1.02 (0.07)	0.7824	4305	0.9 (0.05)	0.0368		SUSD1
610	rs17292115	9 (116739566)	C (0.21)	2230	1.28 (0.07)	0.000676092	2120	0.92 (0.07)	0.2605	4350	1.09 (0.05)	0.09931		TNFSF8,TNC
611	rs1330362	9 (116819489)	A (0.04)	2240	1.53 (0.14)	0.00222452	2117	0.89 (0.15)	0.4567	4357	1.2 (0.1)	0.09409		TNFSF8,TNC
612	rs13288491	9 (120503031)	A (0.05)	2239	1.49 (0.13)	0.00223922	2109	0.79 (0.14)	0.09169	4348	1.11 (0.09)	0.3083
613	rs917782	9 (125830487)	A (0.32)	2240	1.2 (0.06)	0.0028685	2117	1 (0.06)	0.9837	4357	1.1 (0.04)	0.03371		LHX2,DENND1A
614	rs1329407	9 (128611459)	A (0.19)	2239	0.77 (0.08)	0.00139959	2119	0.99 (0.08)	0.8739	4358	0.87 (0.06)	0.01637		ZBTB43,ZBTB34
615	rs1891730	9 (129348849)	A (0.29)	2237	0.81 (0.07)	0.00199434	2119	1.02 (0.07)	0.8245	4356	0.9 (0.05)	0.03935		STXBP1,RPL12,LRSAM1,FAM129B
616	rs7859961	9 (132098528)	G (0.27)	2240	0.81 (0.07)	0.00424869	2090	1.02 (0.07)	0.8189	4330	0.91 (0.05)	0.05779		C9orf106
617	rs12339253	9 (137294091)	A (0.42)	2238	0.83 (0.06)	0.00228387	2116	1.01 (0.06)	0.8883	4354	0.91 (0.04)	0.03669
618	rs10903569	10 (1887722)	G (0.06)	2240	0.65 (0.14)	0.00284088	2120	1.09 (0.15)	0.5577	4360	0.84 (0.1)	0.08357
619	rs7899916	10 (4776841)	G (0.42)	2237	0.83 (0.06)	0.00289637	2119	0.93 (0.06)	0.2725	4356	0.88 (0.04)	0.003734		AKR1CL2
620	rs8177775	10 (6052396)	G (0.02)	2240	0.47 (0.22)	0.00052203	2116	1.04 (0.21)	0.8459	4356	0.7 (0.15)	0.01866		IL2RA,IL15RA,FBXO18,ANKRD16
621	rs4750200	10 (6348652)	A (0.44)	2240	1.23 (0.06)	0.000952073	2119	0.95 (0.06)	0.4426	4359	1.08 (0.04)	0.06675		PFKFB3
622	rs7094085	10 (7742349)	G (0.08)	2238	0.7 (0.12)	0.00283172	2120	1.03 (0.13)	0.8032	4358	0.84 (0.09)	0.04935		KIN,ITIH2,ITIH5
623	rs1999975	10 (8243481)	A (0.41)	2239	1.2 (0.06)	0.00274165	2117	1.01 (0.06)	0.8153	4356	1.11 (0.04)	0.02087		GATA3
624	rs11256803	10 (10817972)	G (0.12)	2239	0.76 (0.1)	0.00418319	2115	0.94 (0.1)	0.5353	4354	0.84 (0.07)	0.01292
625	rs630840	10 (11233957)	G (0.46)	2239	1.23 (0.06)	0.00107637	2112	1.11 (0.07)	0.1	4351	1.17 (0.04)	0.0004802		CUGBP2
626	rs12570229	10 (13381191)	G (0.3)	2240	0.79 (0.07)	0.000745054	2118	1.03 (0.07)	0.6246	4358	0.9 (0.05)	0.03783		SEPHS1,PHYH,MCM10,C10orf49
627	rs12244056	10 (14527819)	C (0.23)	2240	1.25 (0.07)	0.00186569	2118	1.15 (0.07)	0.05257	4358	1.2 (0.05)	0.0003415		FAM107B
628	rs17267324	10 (14805582)	G (0.03)	2148	0.53 (0.21)	0.00264561	2121	0.81 (0.22)	0.3345	4269	0.65 (0.15)	0.004913		FAM107B,ARMETL1
629	rs10128215	10 (16671981)	A (0.04)	2238	1.72 (0.16)	0.000942063	2119	0.77 (0.18)	0.1381	4357	1.19 (0.12)	0.1815		RSU1,PTER,C1QL3
630	rs12359150	10 (17072596)	A (0.02)	2238	0.52 (0.21)	0.00176831	2119	1.09 (0.21)	0.6988	4357	0.74 (0.15)	0.04872		CUBN
631	rs11254509	10 (17380348)	A (0.22)	2240	0.8 (0.07)	0.00194842	2121	0.98 (0.08)	0.793	4361	0.88 (0.05)	0.01625		VIM,TRDMT1,ST8SIA6
632	rs12358488	10 (18369841)	A (0.15)	2239	0.77 (0.09)	0.00329233	2070	0.88 (0.08)	0.116	4309	0.83 (0.06)	0.001337		SLC39A12,CACNB2
633	rs16917412	10 (18845484)	A (0.05)	2162	0.55 (0.15)	0.000109271	2112	1.05 (0.15)	0.7293	4274	0.77 (0.11)	0.01212		NSUN6,CACNB2
634	rs10508683	10 (25415789)	G (0.03)	2239	1.59 (0.14)	0.00100714	2121	0.83 (0.15)	0.2266	4360	1.18 (0.1)	0.1302		THNSL1,GPR158,C10orf63
635	rs2489684	10 (42182085)	G (0.44)	2232	1.23 (0.06)	0.000640391	2117	1.1 (0.06)	0.1172	4349	1.17 (0.04)	0.000402
636	rs11101060	10 (50121849)	A (0.12)	2239	1.34 (0.09)	0.00119055	2119	0.92 (0.09)	0.3644	4358	1.11 (0.06)	0.09089		C10orf71,C10orf128
637	rs7918039	10 (53250225)	A (0.07)	2231	0.7 (0.12)	0.00235237	2119	1.05 (0.12)	0.7121	4350	0.85 (0.08)	0.05476		PRKG1
638	rs16927986	10 (53647383)	A (0.15)	2239	1.31 (0.09)	0.00296236	2120	1.02 (0.09)	0.8233	4359	1.16 (0.06)	0.02229		PRKG1,DKK1
639	rs7350384	10 (60614717)	A (0.49)	2239	1.26 (0.06)	0.000118465	2119	0.98 (0.06)	0.7833	4358	1.12 (0.04)	0.01025		BICC1
640	rs10994023	10 (61232983)	G (0.06)	2240	0.67 (0.14)	0.00344217	2120	0.96 (0.14)	0.7818	4360	0.8 (0.1)	0.02203		SLC16A9,CCDC6
641	rs7084300	10 (63033004)	G (0.05)	2239	0.65 (0.13)	0.00167563	2121	1 (0.14)	0.9997	4360	0.79 (0.1)	0.02435
642	rs7894504	10 (63439845)	G (0.31)	2240	0.81 (0.07)	0.00194842	2120	0.95 (0.07)	0.4876	4360	0.88 (0.05)	0.006839		ARID5B
643	rs2616127	10 (71117832)	A (0.25)	2237	1.23 (0.07)	0.00192903	2121	0.96 (0.07)	0.5204	4358	1.09 (0.05)	0.07618		C10orf35
644	rs10998957	10 (71198936)	G (0.47)	2240	1.21 (0.06)	0.00179221	2118	0.92 (0.06)	0.2053	4358	1.06 (0.04)	0.1752		COL13A1
645	rs10824076	10 (75556962)	A (0.16)	2235	0.75 (0.08)	0.000610878	2120	0.94 (0.09)	0.4859	4355	0.84 (0.06)	0.003271		VCL,AP3M1,ADK
646	rs2247557	10 (78471805)	A (0.1)	2240	1.43 (0.1)	0.000678536				2240	1.43 (0.1)	0.0006785		KCNMA1
647	rs11002285	10 (79196399)	G (0.02)	2240	0.53 (0.19)	0.000919084	2116	1.31 (0.18)	0.1277	4356	0.86 (0.13)	0.1885		DLG5
648	rs2002688	10 (80117004)	C (0.27)	2240	1.25 (0.07)	0.00110681	2120	0.89 (0.07)	0.07458	4360	1.05 (0.05)	0.2737
649	rs7917285	10 (80164188)	A (0.22)	2226	1.24 (0.07)	0.00283172	2120	0.88 (0.07)	0.07065	4346	1.05 (0.05)	0.3821
650	rs11202117	10 (88421506)	G (0.41)	2238	0.82 (0.06)	0.00179823	2112	1.07 (0.07)	0.3	4350	0.93 (0.04)	0.1293		OPN4,LDB3,BMPR1A
651	rs2105436	10 (90792904)	C (0.46)	2234	1.21 (0.06)	0.00150864	2112	0.97 (0.06)	0.6691	4346	1.09 (0.04)	0.04804		FAS,ACTA2
652	rs727852	10 (97980573)	A (0.29)	2237	0.8 (0.07)	0.00110296	2121	0.83 (0.07)	0.009003	4358	0.82 (0.05)	3.184e-05		ZNF518A,DNTT,BLNK
653	rs7078084	10 (106699751)	A (0.05)	2240	0.58 (0.17)	0.00193547	2121	0.79 (0.19)	0.2104	4361	0.67 (0.13)	0.001967		SORCS3
654	rs17118444	10 (106875987)	C (0.01)	2240	0.19 (0.54)	0.00263513	2121	0.54 (0.44)	0.1582	4361	0.36 (0.34)	0.001692	rs11814806 (1)	SORCS3
655	rs11814806	10 (106893008)	G (0.02)	2240	0.25 (0.43)	0.00154495	2118	0.54 (0.44)	0.159	4358	0.37 (0.31)	0.001147		SORCS3
656	rs11192469	10 (107272321)	G (0.27)	2239	1.23 (0.07)	0.00331337	2121	0.95 (0.07)	0.5002	4360	1.08 (0.05)	0.1022
657	rs10458732	10 (108490394)	A (0.03)	2240	0.47 (0.24)	0.00148825	2121	0.78 (0.26)	0.3384	4361	0.59 (0.17)	0.003234		SORCS1
658	rs7906643	10 (112535484)	A (0.08)	2239	1.36 (0.1)	0.00333452	2120	0.81 (0.1)	0.03608	4359	1.05 (0.07)	0.521		PDCD4
659	rs10749132	10 (115237428)	A (0.14)	2238	0.78 (0.09)	0.00560187	2116	0.9 (0.09)	0.268	4354	0.84 (0.06)	0.00581		HABP2
660	rs11198878	10 (121072836)	C (0.03)	2238	1.68 (0.17)	0.00291509	2119	0.59 (0.14)	0.0002783	4357	0.91 (0.11)	0.6881		GRK5
661	rs12218663	10 (121209746)	A (0.06)	2240	0.66 (0.13)	0.00109912	2102	1.17 (0.13)	0.2314	4342	0.87 (0.09)	0.1306		RGS10,GRK5
662	rs10886492	10 (121215466)	A (0.23)	2239	0.77 (0.07)	0.000287665	2119	1 (0.08)	0.9854	4358	0.87 (0.05)	0.009699		RGS10,GRK5
663	rs10902853	10 (124730611)	A (0.41)	2240	1.22 (0.06)	0.00145318	2108	0.96 (0.06)	0.5374	4348	1.09 (0.04)	0.06348		PSTK,IKZF5,FAM24A,C10orf88,ACADSB
664	rs4980245	10 (124783587)	G (0.05)	2240	1.55 (0.11)	0.0001402	2119	1 (0.12)	0.9883	4359	1.27 (0.08)	0.006146		PSTK,IKZF5,C10orf88,ACADSB
665	rs1219822	10 (125439005)	G (0.14)	2239	1.37 (0.09)	0.000366671	2120	1.02 (0.09)	0.8265	4359	1.19 (0.06)	0.006801		GPR26,CPXM2
666	rs7904325	10 (125925994)	A (0.18)	2238	1.29 (0.08)	0.00169266	2119	1.09 (0.08)	0.3113	4357	1.19 (0.06)	0.003115
667	rs7912236	10 (127879242)	A (0.31)	2236	0.81 (0.07)	0.00156606	2115	0.96 (0.07)	0.5604	4351	0.88 (0.05)	0.007522		ADAM12
668	rs3858320	10 (127968782)	G (0.49)	2236	0.82 (0.06)	0.00188449	2119	1.11 (0.06)	0.1032	4355	0.95 (0.04)	0.2756		ADAM12
669	rs10764767	10 (129906560)	G (0.1)	2238	1.42 (0.1)	0.000316409	2051	0.9 (0.11)	0.3517	4289	1.16 (0.07)	0.05028		MKI67
670	rs11595866	10 (129982352)	A (0.26)	2220	0.81 (0.07)	0.0018908	2121	1.12 (0.07)	0.08818	4341	0.95 (0.05)	0.303
671	rs11016257	10 (130153338)	A (0.21)	2237	0.8 (0.07)	0.00255264				2237	0.8 (0.07)	0.002553
672	rs7086428	10 (130668442)	G (0.43)	2238	1.25 (0.06)	0.000343908				2238	1.24 (0.06)	0.0003439
673	rs11606393	11 (198235)	A (0.23)	2240	0.81 (0.07)	0.0039222				2240	0.81 (0.07)	0.003922		SIRT3,SCGB1C1,RIC8A,PSMD13,ODF3,NLRP6,IFITM2,IFITM5,BET1L,ATHL1
674	rs1554519	11 (10860643)	A (0.42)	2240	0.78 (0.06)	5.064e-05	2108	0.98 (0.07)	0.7804	4348	0.87 (0.05)	0.001916		EIF4G2
675	rs12788362	11 (12188308)	G (0.17)	2240	1.3 (0.07)	0.000455377	2121	0.98 (0.08)	0.8347	4361	1.14 (0.05)	0.01793		MICAL2,MICALCL
676	rs7948130	11 (13580665)	A (0.07)	2240	1.4 (0.11)	0.00174471	2119	1.07 (0.11)	0.5262	4359	1.23 (0.08)	0.00723		FAR1
677	rs4148624	11 (17400600)	G (0.05)	2238	1.44 (0.12)	0.0017272	2118	0.93 (0.13)	0.5608	4356	1.18 (0.09)	0.0657		USH1C,NUCB2,KCNJ11,ABCC8
678	rs2445199	11 (18132322)	G (0.34)	2238	0.82 (0.06)	0.00200098	2121	0.9 (0.06)	0.1019	4359	0.86 (0.05)	0.0007932		SAAL1,SAA2,SAA4,MRGPRX4,MRGPRX3
679	rs17614100	11 (19966021)	G (0.13)	2239	0.71 (0.1)	0.00055561	2121	0.94 (0.1)	0.5071	4360	0.81 (0.07)	0.003317		NAV2
680	rs1509605	11 (24533759)	A (0.36)	2234	1.21 (0.06)	0.00243069	2121	1.04 (0.06)	0.5271	4355	1.13 (0.05)	0.00898		LUZP2
681	rs7938462	11 (27154937)	A (0.36)	2236	0.76 (0.06)	2.32298e-05	2119	1.02 (0.07)	0.7633	4355	0.88 (0.05)	0.004774		BBOX1
682	rs7939668	11 (27176371)	A (0.35)	2240	0.79 (0.06)	0.000278996	2118	1 (0.07)	0.9765	4358	0.89 (0.05)	0.009742	rs7938462 (0.9)	BBOX1
683	rs3758640	11 (33871004)	G (0.33)	2239	1.24 (0.06)	0.00081468	2103	0.94 (0.06)	0.3674	4342	1.08 (0.05)	0.07561		LMO2
684	rs1522679	11 (37307404)	A (0.44)	2239	0.79 (0.06)	0.000144168	2118	1.01 (0.06)	0.8586	4357	0.89 (0.04)	0.009309
685	rs2045826	11 (41597967)	A (0.29)	2213	0.81 (0.07)	0.00256097	2112	0.95 (0.07)	0.4697	4325	0.88 (0.05)	0.007753
686	rs1007738	11 (46849360)	A (0.48)	2238	1.18 (0.06)	0.00680894	2115	0.97 (0.06)	0.6245	4353	1.07 (0.04)	0.1098		LRP4,F2,CKAP5
687	rs7119763	11 (56382887)	G (0.27)	2238	1.21 (0.06)	0.00290571	2091	0.98 (0.07)	0.7251	4329	1.09 (0.05)	0.0579
688	rs2077190	11 (56704104)	C (0.25)	2239	0.82 (0.07)	0.00977671				2239	0.82 (0.07)	0.009777		LRRC55,APLNR
689	rs2903267	11 (56956516)	G (0.37)	2240	1.26 (0.06)	0.000319946	2121	0.97 (0.06)	0.6426	4361	1.11 (0.04)	0.02411		LRRC55,APLNR
690	rs12222446	11 (67811600)	C (0.13)	2237	1.34 (0.09)	0.00073973	2120	1.01 (0.09)	0.9501	4357	1.17 (0.06)	0.01383		SUV420H1,LRP5,C11orf24
691	rs3019779	11 (68638225)	A (0.24)	2237	0.81 (0.07)	0.00244663				2237	0.81 (0.07)	0.002447		TPCN2
692	rs7119726	11 (70136496)	A (0.17)	2240	1.27 (0.08)	0.00310841	2107	1.02 (0.08)	0.8514	4347	1.14 (0.06)	0.02426		SHANK2
693	rs1122373	11 (73588240)	A (0.09)	2236	0.73 (0.11)	0.00463407	2117	1.08 (0.11)	0.4768	4353	0.89 (0.08)	0.1252		UCP2,PAAF1,MRPL48,DNAJB13,CHCHD8
694	rs17142254	11 (80852929)	A (0)	2240	3.96 (0.43)	0.00146897	2100	0.95 (0.82)	0.9451	4340	2.91 (0.38)	0.02527
695	rs586353	11 (81495856)	C (0.4)	2237	1.21 (0.06)	0.00199434	2112	0.88 (0.07)	0.05797	4349	1.05 (0.05)	0.3704
696	rs11234495	11 (85353082)	A (0.27)	2240	0.8 (0.07)	0.0018225	2115	0.91 (0.07)	0.2222	4355	0.85 (0.05)	0.002024		PICALM,CCDC83
697	rs2433447	11 (86260355)	A (0.33)	2229	0.74 (0.06)	1.61029e-06	2120	1.06 (0.07)	0.3758	4349	0.88 (0.05)	0.004864		PRSS23,FZD4
698	rs947884	11 (86263440)	A (0.36)	2240	0.78 (0.06)	8.59144e-05	2002	1.03 (0.07)	0.6922	4242	0.88 (0.05)	0.009826	rs2433447 (0.9)	PRSS23,FZD4
699	rs2202150	11 (88782954)	A (0.48)	2238	1.19 (0.06)	0.00353055	2119	1.01 (0.06)	0.886	4357	1.1 (0.04)	0.02846		NOX4
700	rs10830568	11 (90124945)	C (0.4)	2238	1.23 (0.06)	0.000803149	2119	0.98 (0.06)	0.7866	4357	1.1 (0.04)	0.02687
701	rs10765421	11 (90394576)	A (0.38)	2240	1.21 (0.06)	0.00191621	2120	0.95 (0.06)	0.401	4360	1.07 (0.04)	0.1013
702	rs496321	11 (94886632)	A (0.34)	2240	0.83 (0.06)	0.00409861	2121	0.97 (0.07)	0.6157	4361	0.9 (0.05)	0.01607		SFRS2B,SESN3,ENDOD1
703	rs1451332	11 (95807237)	A (0.33)	2237	1.23 (0.07)	0.00199434	2115	1.02 (0.07)	0.7984	4352	1.12 (0.05)	0.01666		MAML2,JRKL,CCDC82
704	rs17129910	11 (96555728)	A (0.39)	2240	0.81 (0.06)	0.00139005	2119	1.03 (0.06)	0.6317	4359	0.92 (0.05)	0.0503
705	rs11223269	11 (99592525)	C (0.11)	2239	1.34 (0.09)	0.0023065	2120	0.89 (0.1)	0.2312	4359	1.1 (0.07)	0.1773		CNTN5
706	rs6590919	11 (101151777)	A (0.04)	2193	0.59 (0.14)	0.000185696	2120	1 (0.15)	0.9783	4313	0.76 (0.1)	0.007268
707	rs12293915	11 (101266595)	A (0.11)	2240	0.69 (0.1)	0.000164346	2119	0.95 (0.1)	0.6146	4359	0.8 (0.07)	0.00227		KIAA1377,ANGPTL5
708	rs10502156	11 (111770882)	A (0.32)	2223	0.81 (0.07)	0.00136645	2119	0.99 (0.07)	0.8635	4342	0.89 (0.05)	0.01591
709	rs7103866	11 (112669978)	A (0.38)	2239	1.21 (0.06)	0.00252781	2121	1.03 (0.06)	0.6454	4360	1.12 (0.04)	0.01295		TTC12,NCAM1,ANKK1
710	rs2155289	11 (112885081)	G (0.3)	2240	1.23 (0.07)	0.00208227	2121	1.08 (0.07)	0.2217	4361	1.15 (0.05)	0.002225		NCAM1
711	rs1791807	11 (113459444)	G (0.43)	2240	0.81 (0.06)	0.000919084	2120	0.9 (0.06)	0.103	4360	0.86 (0.04)	0.000444		ZBTB16,HTR3A
712	rs536896	11 (113542655)	A (0.05)	2239	0.61 (0.16)	0.0017272	2121	0.87 (0.16)	0.3835	4360	0.73 (0.11)	0.004326		ZBTB16
713	rs500629	11 (113550770)	C (0.37)	2239	1.23 (0.06)	0.00111454	2112	0.97 (0.06)	0.6037	4351	1.09 (0.04)	0.04806		ZBTB16
714	rs476529	11 (113585070)	G (0.02)	2234	0.51 (0.17)	0.000170967	2121	0.78 (0.2)	0.2154	4355	0.62 (0.13)	0.0003759		ZBTB16,NNMT
715	rs11215584	11 (114900507)	A (0.15)	2240	0.73 (0.09)	0.0007946	2119	0.76 (0.1)	0.006658	4359	0.74 (0.07)	1.734e-05		CADM1
716	rs11215639	11 (115001384)	A (0.02)	2240	0.46 (0.23)	0.000745054	2121	0.94 (0.22)	0.771	4361	0.67 (0.16)	0.008794
717	rs384464	11 (115411845)	A (0.24)	2239	0.79 (0.07)	0.00150864	2121	0.79 (0.08)	0.002132	4360	0.79 (0.05)	1.006e-05
718	rs1426391	11 (115448463)	C (0.3)	2240	0.81 (0.07)	0.00176239	2104	0.8 (0.07)	0.001216	4344	0.8 (0.05)	6.88e-06
719	rs1039755	11 (115889336)	G (0.14)	2240	0.73 (0.09)	0.000915844	2121	0.95 (0.1)	0.6473	4361	0.83 (0.07)	0.007038
720	rs2156120	11 (116062365)	G (0.12)	2240	1.3 (0.08)	0.00126258				2240	1.3 (0.08)	0.001263		ZNF259,BUD13
721	rs11216096	11 (116067790)	A (0.29)	2239	1.29 (0.06)	5.04266e-05	2119	1.13 (0.06)	0.06527	4358	1.21 (0.04)	2.778e-05		ZNF259,BUD13,APOA5
722	rs1145195	11 (116076460)	A (0.35)	2238	0.71 (0.07)	1.68206e-07	2112	0.9 (0.07)	0.1155	4350	0.79 (0.05)	1.24e-06		ZNF259,BUD13,APOA5
723	rs7946299	11 (116093059)	G (0.05)	2238	0.66 (0.13)	0.00245464	2120	0.86 (0.16)	0.3461	4358	0.74 (0.1)	0.004689		ZNF259,BUD13,APOA5
724	rs180360	11 (116104198)	G (0.38)	2240	0.75 (0.06)	1.15272e-05	2119	0.69 (0.07)	1.96e-08	4359	0.72 (0.05)	1.67e-12		ZNF259,BUD13,APOA5,APOA4
725	rs3741301	11 (116136601)	G (0.23)	2238	0.7 (0.07)	1.51774e-06	2120	0.79 (0.08)	0.002858	4358	0.74 (0.05)	3.269e-08		ZNF259,KIAA0999,BUD13,APOC3,APOA5,APOA4,APOA1
726	rs964184	11 (116154127)	C (0.3)	2238	1.83 (0.07)	1.5919e-19	2119	1.72 (0.06)	4.21e-17	4357	1.77 (0.05)	5.479e-35		ZNF259,KIAA0999,BUD13,APOC3,APOA5,APOA4,APOA1
727	rs1942478	11 (116156673)	C (0.13)	2240	0.73 (0.09)	0.000806017	2120	0.74 (0.09)	0.001248	4360	0.74 (0.07)	3.281e-06		ZNF259,KIAA0999,BUD13,APOC3,APOA5,APOA4,APOA1
728	rs6589567	11 (116175886)	A (0.2)	2227	1.54 (0.07)	1.09588e-08	2121	1.48 (0.07)	8.66e-08	4348	1.51 (0.05)	4.926e-15		ZNF259,KIAA0999,BUD13,APOC3,APOA5,APOA4,APOA1
729	rs2849176	11 (116202131)	A (0.33)	2239	1.2 (0.06)	0.00400423	2120	1.12 (0.06)	0.09074	4359	1.16 (0.04)	0.001186		ZNF259,KIAA0999,BUD13,APOC3,APOA5,APOA4,APOA1
730	rs12718464	11 (116212611)	A (0.06)	2240	0.63 (0.15)	0.00241484				2240	0.63 (0.15)	0.002415		ZNF259,KIAA0999,BUD13,APOC3,APOA5,APOA4,APOA1
731	rs3889570	11 (116805250)	G (0.34)	2240	0.78 (0.06)	0.000147654	2116	0.96 (0.07)	0.5535	4356	0.86 (0.05)	0.001722		DSCAML1,CEP164
732	rs10892052	11 (116834313)	A (0.4)	2240	0.82 (0.06)	0.00141402	2120	0.82 (0.06)	0.002885	4360	0.82 (0.04)	1.268e-05		KIAA0999
733	rs12279593	11 (117039159)	A (0.36)	2239	0.78 (0.07)	0.000231913	2070	0.89 (0.07)	0.09318	4309	0.83 (0.05)	0.0001349		DSCAML1
734	rs4938507	11 (117736794)	G (0.33)	2240	1.24 (0.07)	0.00116604	2116	1.09 (0.07)	0.1769	4356	1.16 (0.05)	0.001077		UBE4A,MPZL2,MLL,CD3D,CD3G,CD3E,ATP5L
735	rs2510139	11 (118669887)	A (0.33)	2217	0.82 (0.07)	0.00316865	2113	0.89 (0.07)	0.07132	4330	0.85 (0.05)	0.0007481		USP2,RNF26,MFRP,MCAM,CBL,C1QTNF5
736	rs891292	11 (118881882)	G (0.49)	2238	0.84 (0.06)	0.00408006				2238	0.84 (0.06)	0.00408		THY1
737	rs570521	11 (119239067)	C (0.14)	2239	1.3 (0.08)	0.00195492	2108	1.1 (0.08)	0.2086	4347	1.19 (0.06)	0.001946
738	rs562966	11 (119581326)	G (0.32)	2239	1.3 (0.06)	3.40604e-05	2119	1.08 (0.06)	0.2274	4358	1.19 (0.04)	0.0001376		TRIM29,POU2F3,OAF
739	rs2096883	11 (119642754)	G (0.43)	2239	0.8 (0.06)	0.000557646	2119	0.91 (0.07)	0.1503	4358	0.85 (0.05)	0.0005072		TMEM136,POU2F3,OAF,ARHGEF12
740	rs3897568	11 (119908543)	G (0.49)	2237	0.82 (0.06)	0.00159822	2113	1.01 (0.06)	0.8286	4350	0.91 (0.04)	0.03464		ARHGEF12
741	rs1954787	11 (120168573)	A (0.27)	2239	0.8 (0.07)	0.00158743	2119	0.91 (0.07)	0.1805	4358	0.85 (0.05)	0.001386		GRIK4
742	rs622373	11 (120256845)	G (0.21)	2240	0.79 (0.08)	0.00303946	2109	0.92 (0.09)	0.3811	4349	0.84 (0.06)	0.006202		TMEM136,POU2F3,ARHGEF12
743	rs17246639	11 (121784992)	A (0.39)	2209	0.82 (0.06)	0.00164204	2113	0.89 (0.07)	0.0657	4322	0.85 (0.05)	0.0004037
744	rs2697718	11 (126704758)	A (0.16)	2240	1.29 (0.08)	0.00107262	2121	0.84 (0.08)	0.03593	4361	1.06 (0.06)	0.3782
745	rs7112864	11 (127766621)	G (0.19)	2240	1.28 (0.08)	0.00129785	2121	1 (0.08)	0.9655	4361	1.14 (0.05)	0.01952		ETS1
746	rs4937508	11 (129762212)	A (0.4)	2209	1.23 (0.06)	0.000915844	2116	1.03 (0.06)	0.623	4325	1.13 (0.04)	0.006665		ZBTB44,ADAMTS8,ADAMTS15
747	rs2951955	11 (130050082)	C (0.15)	2240	1.31 (0.08)	0.000721372	2121	0.97 (0.08)	0.677	4361	1.13 (0.06)	0.03294
748	rs7101906	11 (130802650)	C (0.06)	2238	0.65 (0.12)	0.000516305	2119	0.89 (0.13)	0.3982	4357	0.75 (0.09)	0.002086		HNT
749	rs6590658	11 (132141999)	A (0.08)	2234	0.71 (0.11)	0.00175058				2234	0.71 (0.11)	0.001751		OPCML
750	rs7929735	11 (133370148)	A (0.34)	2238	0.82 (0.06)	0.00249505	2120	1.03 (0.06)	0.635	4358	0.92 (0.05)	0.06637		JAM3,IGSF9B
751	rs933420	12 (2996301)	G (0.07)	2240	1.36 (0.1)	0.00191621				2240	1.35 (0.1)	0.001916		TULP3,TSPAN9,TEAD4
752	rs3217830	12 (4262791)	A (0.12)	2240	1.29 (0.08)	0.00306884	2085	0.99 (0.09)	0.8686	4325	1.14 (0.06)	0.04381		FGF23,CCND2,C12orf5
753	rs4329748	12 (7255709)	G (0.23)	2240	0.8 (0.07)	0.00195492	2120	1.05 (0.08)	0.5055	4360	0.91 (0.05)	0.07917		RBP5,PEX5,CLSTN3,ACSM4
754	rs1806201	12 (13608775)	A (0.33)	2236	1.22 (0.06)	0.00200764				2236	1.22 (0.06)	0.002008		GRIN2B
755	rs4764121	12 (14783072)	A (0.17)	2227	0.78 (0.08)	0.00255264	2120	1.01 (0.08)	0.9439	4347	0.88 (0.06)	0.03483		WBP11,LOC440087,HIST4H4,H2AFJ,GUCY2C,C12orf60,ART4
756	rs483684	12 (24395552)	G (0.23)	2240	1.29 (0.07)	0.000304603	2121	1.04 (0.07)	0.5712	4361	1.17 (0.05)	0.002853		SOX5
757	rs11610353	12 (27282464)	C (0.03)	2237	1.75 (0.17)	0.00102136	2121	0.99 (0.19)	0.946	4358	1.35 (0.12)	0.02111		STK38L,ARNTL2
758	rs11050322	12 (29776054)	G (0.2)	2240	0.79 (0.1)	0.0246694	2120	0.91 (0.08)	0.2436	4360	0.87 (0.06)	0.01538		TMTC1
759	rs12818203	12 (30024587)	G (0.21)	2238	0.76 (0.08)	0.000418041	2120	1.04 (0.08)	0.6628	4358	0.88 (0.05)	0.02612
760	rs7299435	12 (37842780)	A (0.07)	2240	1.42 (0.11)	0.00103577	2115	1.27 (0.11)	0.0355	4355	1.35 (0.08)	0.0001345
761	rs11181359	12 (42563074)	G (0.26)	2240	1.21 (0.07)	0.00535233	2119	0.82 (0.07)	0.005137	4359	1.01 (0.05)	0.9638		YAF2,GLT8D3
762	rs11169128	12 (48410306)	G (0.09)	2239	0.65 (0.12)	0.000734441	2119	0.77 (0.13)	0.04819	4358	0.71 (0.09)	0.000146		TEGT,PRPF40B,LOC283331,KIAA1602,FMNL3
763	rs686339	12 (51310079)	A (0.3)	2235	0.82 (0.07)	0.00359819	2116	1 (0.07)	0.9623	4351	0.91 (0.05)	0.04001		KRT72,KRT77,KRT74,KRT73,KRT71,KRT2,KRT1
764	rs2280697	12 (51804087)	C (0.17)	2239	0.73 (0.08)	0.000251511	2119	0.96 (0.09)	0.6061	4358	0.83 (0.06)	0.00285		ZNF740,TENC1,SPRYD3,SOAT2,RARG,ITGB7,IGFBP6,EIF4B,CSAD
765	rs699588	12 (61608298)	G (0.44)	2222	1.24 (0.06)	0.000619821	2120	1.05 (0.06)	0.427	4342	1.14 (0.04)	0.002668		PPM1H
766	rs4453317	12 (65284666)	A (0.23)	2235	0.79 (0.07)	0.00190346	2121	1.24 (0.07)	0.004538	4356	0.99 (0.05)	0.8075		GRIP1
767	rs7957244	12 (65493897)	A (0.31)	2240	0.82 (0.06)	0.00260297	2113	1.02 (0.07)	0.7688	4353	0.91 (0.05)	0.05056
768	rs4550264	12 (70964827)	A (0.04)	2238	0.47 (0.24)	0.00183475	2112	0.97 (0.23)	0.882	4350	0.69 (0.16)	0.01937		TRHDE
769	rs7955287	12 (71664259)	A (0.31)	2228	1.22 (0.06)	0.00204126	2121	1.01 (0.07)	0.8726	4349	1.11 (0.05)	0.02037
770	rs1317508	12 (75635568)	G (0.43)	2237	0.83 (0.06)	0.00247882	2119	1.02 (0.06)	0.709	4356	0.92 (0.04)	0.05637		ZDHHC17
771	rs1879560	12 (77393236)	C (0.04)	2240	1.63 (0.15)	0.00145318	2121	0.85 (0.17)	0.317	4361	1.21 (0.11)	0.1132
772	rs11611632	12 (87969670)	G (0.47)	2240	1.23 (0.06)	0.000993106	2121	0.92 (0.06)	0.1693	4361	1.06 (0.04)	0.1612
773	rs1689408	12 (88278032)	A (0.17)	2240	1.3 (0.08)	0.000909396	2121	1.04 (0.08)	0.6608	4361	1.16 (0.06)	0.007288		WDR51B,DUSP6
774	rs11106105	12 (90268652)	A (0.29)	2203	0.78 (0.07)	0.000253457	2121	0.96 (0.07)	0.5717	4324	0.86 (0.05)	0.002633
775	rs7973111	12 (90836558)	A (0.05)	2240	0.6 (0.17)	0.00261995	2116	0.87 (0.19)	0.4494	4356	0.7 (0.13)	0.007252
776	rs10859602	12 (92776549)	A (0.14)	2239	0.71 (0.1)	0.000343908	2118	0.86 (0.11)	0.1425	4357	0.77 (0.07)	0.0003324		CRADD
777	rs4275668	12 (92782327)	G (0.3)	2238	0.81 (0.07)	0.00187194	2119	0.91 (0.07)	0.1911	4357	0.85 (0.05)	0.001686		CRADD
778	rs10859699	12 (93383140)	A (0.39)	2228	0.77 (0.06)	6.04137e-05	2121	0.95 (0.06)	0.4676	4349	0.86 (0.05)	0.0007294		CCDC41
779	rs728661	12 (94595451)	G (0.27)	2238	1.25 (0.07)	0.0014433	2120	1 (0.07)	0.9658	4358	1.11 (0.05)	0.02425		NTN4
780	rs2888124	12 (96206142)	G (0.24)	2238	1.23 (0.07)	0.00339874	2121	1.05 (0.07)	0.4652	4359	1.13 (0.05)	0.0091
781	rs7971575	12 (103749636)	A (0.03)	2221	0.58 (0.18)	0.00336649				2221	0.58 (0.18)	0.003366		SLC41A2,CHST11
782	rs1148416	12 (105149261)	C (0.05)	2237	1.4 (0.11)	0.00203449	2116	0.87 (0.11)	0.2185	4353	1.12 (0.08)	0.1758		TCP11L2,NUAK1,CKAP4
783	rs4964190	12 (105740489)	A (0.3)	2240	1.24 (0.07)	0.00151378	2120	0.99 (0.07)	0.93	4360	1.11 (0.05)	0.02694		RIC8B,RFX4
784	rs12308186	12 (105778687)	G (0.18)	2240	1.3 (0.08)	0.000666395	2120	1.01 (0.08)	0.9236	4360	1.15 (0.05)	0.01221		RIC8B,RFX4,C12orf23
785	rs2589266	12 (105780116)	A (0.34)	2238	0.82 (0.07)	0.00208918	2042	1.08 (0.07)	0.2838	4280	0.93 (0.05)	0.1376		RIC8B,RFX4,C12orf23
786	rs10778610	12 (107080556)	A (0.42)	2240	0.82 (0.06)	0.00184707	2115	0.91 (0.06)	0.1359	4355	0.86 (0.04)	0.001067		WSCD2
787	rs4964193	12 (107321748)	G (0.27)	2240	0.8 (0.07)	0.00295285	2113	1 (0.08)	0.9966	4353	0.89 (0.05)	0.03273		RIC8B,MTERFD3,CRY1,C12orf23
788	rs1732325	12 (115338506)	A (0.01)	2239	2.04 (0.23)	0.00256932				2239	2.04 (0.23)	0.002569
789	rs16950305	12 (119506864)	A (0.16)	2232	0.75 (0.09)	0.00122819				2232	0.75 (0.09)	0.001228		RNF10,POP5,DYNLL1,COQ5,CABP1
790	rs28613273	12 (122522857)	G (0.05)	2240	0.62 (0.16)	0.00293391	2120	0.88 (0.14)	0.358	4360	0.76 (0.1)	0.005553		U1SNRNPBP,SETD8,RILPL2,RILPL1
791	rs7350634	12 (124018154)	A (0.06)	2240	1.41 (0.1)	0.00114598	2059	0.69 (0.11)	0.001025	4299	1.02 (0.08)	0.9402		UBC,DHX37,BRI3BP,AACS
792	rs4760568	12 (127810641)	G (0.49)	2227	1.2 (0.06)	0.00237562				2227	1.2 (0.06)	0.002376		SLC15A4,GLT1D1
793	rs9317191	13 (22221534)	G (0.1)	2240	1.4 (0.11)	0.00295285	2121	1.28 (0.13)	0.05623	4361	1.35 (0.08)	0.0005363
794	rs4770334	13 (22376133)	A (0.37)	2238	1.23 (0.06)	0.001142	2117	0.96 (0.06)	0.4971	4355	1.09 (0.04)	0.0631
795	rs17283612	13 (22474130)	A (0.16)	2238	1.31 (0.08)	0.00109149	2119	1.18 (0.09)	0.0513	4357	1.25 (0.06)	0.0002158
796	rs3117978	13 (22563930)	G (0.08)	2240	0.68 (0.13)	0.00248032	2120	1.08 (0.11)	0.5062	4360	0.88 (0.08)	0.08815
797	rs943051	13 (24139241)	G (0.37)	2239	0.83 (0.06)	0.00251138	2113	0.92 (0.06)	0.1878	4352	0.87 (0.04)	0.002033		RNF17,ATP12A
798	rs9318790	13 (24237889)	A (0.08)	2235	1.41 (0.1)	0.000803149	2119	1.07 (0.1)	0.5009	4354	1.23 (0.07)	0.004093		RNF17,ATP12A
799	rs9512215	13 (25934747)	G (0.25)	2240	0.76 (0.07)	0.000156719	2120	1.11 (0.07)	0.1628	4360	0.91 (0.05)	0.08251		WASF3,CDK8
800	rs2182880	13 (26268669)	A (0.32)	2240	1.27 (0.06)	0.000253457	2114	1.03 (0.07)	0.6592	4354	1.15 (0.05)	0.003372		GPR12
801	rs9551324	13 (26284158)	G (0.47)	2238	1.25 (0.06)	0.000527815	2120	0.95 (0.06)	0.3807	4358	1.09 (0.04)	0.06113		GPR12
802	rs2760908	13 (26844485)	G (0.39)	2238	0.8 (0.06)	0.000597687	2104	0.99 (0.07)	0.9051	4342	0.89 (0.05)	0.01085		RASL11A,MTIF3,GTF3A
803	rs9551453	13 (27728997)	C (0.03)	2239	1.64 (0.14)	0.000375036	2121	1.04 (0.15)	0.809	4360	1.33 (0.1)	0.006575		PAN3,FLT1
804	rs7320128	13 (28096931)	G (0.32)	2233	1.24 (0.06)	0.000865423	2117	1.05 (0.06)	0.4762	4350	1.14 (0.05)	0.003932		SLC46A3,POMP
805	rs9508248	13 (29640555)	G (0.09)	2239	1.36 (0.1)	0.00280442	2121	1.03 (0.11)	0.8283	4360	1.2 (0.08)	0.02186		KIAA0774
806	rs6490478	13 (30174728)	C (0.32)	2239	1.28 (0.07)	0.000197709	2120	0.97 (0.07)	0.6616	4359	1.12 (0.05)	0.01817		USPL1,ALOX5AP
807	rs4617690	13 (30194938)	A (0.07)	2237	1.43 (0.11)	0.00163098	2114	0.85 (0.13)	0.1903	4351	1.13 (0.08)	0.1783		USPL1,ALOX5AP
808	rs9568690	13 (32439005)	A (0.11)	2240	1.33 (0.08)	0.000698391	2120	0.92 (0.08)	0.3226	4360	1.11 (0.06)	0.08181		KL
809	rs9537022	13 (32762488)	A (0.19)	2240	0.77 (0.08)	0.00121552	2038	0.81 (0.09)	0.01161	4278	0.79 (0.06)	4.446e-05		STARD13
810	rs1925089	13 (33222836)	A (0.4)	2240	0.81 (0.06)	0.000788947	2112	0.91 (0.06)	0.1427	4352	0.86 (0.04)	0.0006052		RFC3
811	rs7987856	13 (40890286)	G (0.27)	2239	1.26 (0.07)	0.000942063	2120	1.01 (0.07)	0.891	4359	1.14 (0.05)	0.01367		NARG1L,C13orf15
812	rs9533810	13 (43751819)	A (0.03)	2240	1.56 (0.14)	0.00152411	2120	1.3 (0.14)	0.06476	4360	1.43 (0.1)	0.0003708		SERP2
813	rs942894	13 (45051342)	A (0.45)	2216	0.8 (0.06)	0.000450337	2119	0.97 (0.06)	0.6608	4335	0.88 (0.04)	0.004872		COG3
814	rs9526692	13 (50288448)	A (0.45)	2239	0.83 (0.06)	0.00244663	2111	1.1 (0.06)	0.1458	4350	0.95 (0.04)	0.2459		RNASEH2B,DLEU7
815	rs1870839	13 (50371869)	G (0.16)	2226	0.72 (0.09)	0.000355789	2116	0.99 (0.1)	0.8889	4342	0.84 (0.07)	0.007947		RNASEH2B,DLEU7
816	rs17089270	13 (53579049)	C (0.14)	2239	1.34 (0.09)	0.000763971	2120	0.8 (0.09)	0.01551	4359	1.06 (0.06)	0.4689
817	rs9316831	13 (55472937)	G (0.03)	2240	2.11 (0.2)	0.000232187	2121	0.99 (0.19)	0.9591	4361	1.41 (0.14)	0.009255
818	rs1322730	13 (65653522)	G (0.29)	2239	1.22 (0.06)	0.00249505	2120	0.9 (0.07)	0.1177	4359	1.05 (0.05)	0.2818
819	rs1998784	13 (66635881)	G (0.15)	2240	1.3 (0.08)	0.00141886	2118	0.94 (0.08)	0.4394	4358	1.11 (0.06)	0.08037		PCDH9
820	rs12428928	13 (75443091)	C (0.03)	2240	1.57 (0.15)	0.00264561	2120	1 (0.15)	0.9931	4360	1.26 (0.11)	0.03166
821	rs4885546	13 (77998151)	G (0.27)	2240	0.81 (0.07)	0.00386853	2117	1.01 (0.07)	0.9196	4357	0.9 (0.05)	0.0454		RNF219,POU4F1
822	rs11843965	13 (84116789)	A (0.32)	2238	1.2 (0.06)	0.00318897	2116	0.89 (0.06)	0.07839	4354	1.04 (0.04)	0.375
823	rs12863734	13 (85268572)	A (0.03)	2240	0.36 (0.27)	0.000161495	2119	0.77 (0.2)	0.1886	4359	0.58 (0.16)	0.0002933		SLITRK6
824	rs412645	13 (85365970)	G (0.16)	2240	0.74 (0.08)	0.000200825	2095	1.14 (0.09)	0.125	4335	0.91 (0.06)	0.1082		SLITRK6
825	rs7984757	13 (86932410)	A (0.02)	2225	1.58 (0.14)	0.00147313	2114	1.46 (0.16)	0.02115	4339	1.53 (0.11)	0.0001018
826	rs4771834	13 (90917266)	A (0.2)	2240	0.77 (0.08)	0.00134784	2120	0.94 (0.09)	0.4809	4360	0.85 (0.06)	0.005284		GPC5
827	rs993485	13 (91936578)	A (0.23)	2239	0.8 (0.07)	0.00190983	2120	0.84 (0.07)	0.01939	4359	0.82 (0.05)	0.0001157		GPC5
828	rs9561405	13 (93038599)	G (0.03)	2221	0.47 (0.19)	9.24864e-05	2120	0.69 (0.21)	0.07666	4341	0.56 (0.14)	5.492e-05		GPC6
829	rs962320	13 (94991890)	A (0.11)	2239	0.7 (0.11)	0.00126258	2121	1.12 (0.11)	0.3218	4360	0.88 (0.08)	0.1053		DZIP1,CLDN10
830	rs7987913	13 (97325867)	G (0.43)	2239	1.21 (0.06)	0.00208227	2115	1.01 (0.06)	0.938	4354	1.1 (0.04)	0.02372		IPO5
831	rs4772201	13 (98884260)	G (0.3)	2240	1.23 (0.07)	0.00270636	2121	0.88 (0.07)	0.05555	4361	1.04 (0.05)	0.4154		UBAC2,TM9SF2
832	rs1336703	13 (101658528)	A (0.19)	2240	1.25 (0.07)	0.00191621	2118	1 (0.07)	0.9848	4358	1.12 (0.05)	0.02701		FGF14
833	rs9518947	13 (102630974)	G (0.25)	2236	0.8 (0.07)	0.00124099	2119	1.09 (0.08)	0.2477	4355	0.92 (0.05)	0.1317
834	rs12854564	13 (102774234)	C (0.07)	2240	0.7 (0.11)	0.00226145	2108	0.99 (0.13)	0.9562	4348	0.82 (0.09)	0.02575
835	rs9554967	13 (102959967)	A (0.05)	2179	0.65 (0.14)	0.00247073	2120	1.02 (0.16)	0.8799	4299	0.8 (0.1)	0.04047
836	rs9652131	13 (103509817)	G (0.07)	2239	0.68 (0.12)	0.00249505	2121	0.88 (0.13)	0.3217	4360	0.77 (0.09)	0.004261
837	rs4771473	13 (103639238)	A (0.27)	2240	1.24 (0.07)	0.00117823	2121	1.11 (0.07)	0.09943	4361	1.17 (0.05)	0.0005127
838	rs11839232	13 (108496987)	A (0.34)	2239	1.26 (0.06)	0.000350462	2118	1 (0.06)	0.9462	4357	1.12 (0.05)	0.01188		MYO16
839	rs1576166	13 (108986242)	G (0.5)	2238	1.25 (0.06)	0.000309275	2118	0.93 (0.06)	0.2058	4356	1.08 (0.04)	0.08848
840	rs331622	13 (109088827)	A (0.11)	2238	1.38 (0.11)	0.00291509	2120	1 (0.11)	0.9681	4358	1.17 (0.08)	0.03528
841	rs11069890	13 (110807437)	A (0.11)	2239	0.75 (0.09)	0.00255264	2120	0.87 (0.1)	0.1803	4359	0.81 (0.07)	0.001957		C13orf16,ARHGEF7
842	rs2775220	14 (19582612)	C (0.12)	2239	1.32 (0.09)	0.00139005	2120	1.11 (0.09)	0.2464	4359	1.21 (0.06)	0.001939		OR4K13,OR4N5,OR4L1,OR4K15,OR4K17,OR4K14
843	rs10047837	14 (19708855)	A (0.47)	2240	1.18 (0.06)	0.00705578				2240	1.18 (0.06)	0.007056		OR4N5,OR4K17,OR11H6,OR11H4,OR11G2
844	rs3825581	14 (23067853)	A (0.21)	2239	0.77 (0.08)	0.000972389	2113	0.89 (0.08)	0.1397	4352	0.82 (0.06)	0.0006864		THTPA,NGDN,MYH7,JPH4,AP1G2
845	rs8006708	14 (32992634)	G (0.15)	2239	0.77 (0.09)	0.00363245	2120	1.11 (0.09)	0.2622	4359	0.92 (0.06)	0.1927		NPAS3
846	rs12879339	14 (35767894)	A (0.04)	2240	1.53 (0.14)	0.00228387	2118	0.9 (0.15)	0.4462	4358	1.19 (0.1)	0.09772		MBIP
847	rs7160143	14 (37414545)	A (0.36)	2240	1.24 (0.06)	0.000765041	2120	0.91 (0.06)	0.1567	4360	1.07 (0.04)	0.1543		SLC25A21
848	rs2415498	14 (38210287)	A (0.34)	2214	0.82 (0.07)	0.0022099	2121	0.93 (0.07)	0.3024	4335	0.87 (0.05)	0.003631
849	rs17114751	14 (43703447)	G (0.04)	2239	1.6 (0.13)	0.000447005	2121	1.09 (0.14)	0.5667	4360	1.34 (0.1)	0.003553
850	rs7142174	14 (48339919)	A (0.45)	2240	0.84 (0.06)	0.00390512	2066	0.93 (0.06)	0.2185	4306	0.88 (0.04)	0.00335
851	rs10498422	14 (50864166)	C (0.36)	2240	0.77 (0.06)	7.10666e-05	2112	0.95 (0.07)	0.4084	4352	0.85 (0.05)	0.0006125		TXNDC1
852	rs11623917	14 (51991646)	G (0.08)	2239	0.7 (0.11)	0.00175058	2121	0.89 (0.1)	0.2807	4360	0.8 (0.08)	0.002744		TXNDC16,GPR137C
853	rs17126895	14 (53317833)	A (0.17)	2237	1.28 (0.08)	0.00166436	2120	1.01 (0.08)	0.9108	4357	1.14 (0.06)	0.01974
854	rs2179896	14 (53945264)	A (0.47)	2222	0.82 (0.06)	0.00222452	2121	0.99 (0.06)	0.8134	4343	0.9 (0.04)	0.01864		GMFB,CNIH,CDKN3
855	rs11627107	14 (55987989)	A (0.11)	2235	0.76 (0.09)	0.0031384	2121	1.19 (0.1)	0.07696	4356	0.94 (0.07)	0.3779
856	rs8007389	14 (64713100)	A (0.2)	2238	0.78 (0.08)	0.00127131	2121	1 (0.08)	0.9852	4359	0.88 (0.05)	0.02168		MAX
857	rs7143465	14 (69701277)	G (0.07)	2239	0.67 (0.12)	0.00143838	2112	1.03 (0.13)	0.8327	4351	0.82 (0.09)	0.03244		SLC8A3
858	rs4899362	14 (70185859)	G (0.44)	2240	0.81 (0.06)	0.000986155	2119	1.02 (0.06)	0.7131	4359	0.91 (0.05)	0.03527		TTC9,MED6,MAP3K9
859	rs10483832	14 (71060837)	G (0.14)	2238	0.81 (0.09)	0.0202325	2120	0.99 (0.09)	0.866	4358	0.89 (0.06)	0.0748		TTC9,MED6,ADAM20
860	rs4899412	14 (71534015)	A (0.29)	2237	1.26 (0.07)	0.000440411	2120	0.99 (0.06)	0.9124	4357	1.12 (0.05)	0.01462		RGS6
861	rs17105180	14 (76560422)	C (0.1)	2238	0.71 (0.11)	0.00256932	2118	1.15 (0.13)	0.2782	4356	0.88 (0.09)	0.16		KIAA1737,C14orf4
862	rs419630	14 (76779756)	A (0.09)	2240	1.4 (0.11)	0.00182861	2114	1.03 (0.1)	0.7441	4354	1.2 (0.07)	0.01378		TMEM63C,TMED8,POMT2,NGB,GSTZ1
863	rs10131136	14 (78104999)	G (0.1)	2240	0.69 (0.1)	0.000523952	2091	1.1 (0.11)	0.3523	4331	0.87 (0.07)	0.06461		NRXN3
864	rs11626726	14 (78273082)	G (0.14)	2240	0.72 (0.09)	0.000342611	2118	1.02 (0.1)	0.8223	4358	0.85 (0.07)	0.01593		NRXN3
865	rs10146997	14 (79014915)	G (0.19)	2237	1.28 (0.07)	0.00079744	2121	1.01 (0.07)	0.8331	4358	1.14 (0.05)	0.01078		NRXN3
866	rs2371461	14 (80481510)	G (0.35)	2240	0.82 (0.06)	0.00166436	2120	0.99 (0.07)	0.8448	4360	0.89 (0.05)	0.01683		TSHR,C14orf145
867	rs2268477	14 (80680622)	A (0.05)	2240	0.64 (0.15)	0.00300068	2118	1 (0.15)	0.9812	4358	0.8 (0.11)	0.03476		TSHR,GTF2A1
868	rs8021487	14 (81464341)	A (0.04)	2238	0.54 (0.2)	0.0028685	2117	0.7 (0.22)	0.09256	4355	0.61 (0.15)	0.0009327
869	rs1705664	14 (83447496)	G (0.31)	2240	1.24 (0.06)	0.000868497	2117	1.06 (0.07)	0.3735	4357	1.15 (0.05)	0.00263
870	rs10138991	14 (83969190)	G (0.27)	2237	1.23 (0.07)	0.00234467	2119	1.08 (0.07)	0.2621	4356	1.15 (0.05)	0.00305
871	rs8021015	14 (93629737)	G (0.25)	2240	1.27 (0.07)	0.000392303	2120	1.04 (0.07)	0.5271	4360	1.15 (0.05)	0.002863		OTUB2,KIAA1622,IFI27,FAM14B,FAM14A,DDX24,C14orf48
872	rs1884076	14 (94236295)	A (0.24)	2236	0.77 (0.07)	0.000396735	2042	0.9 (0.08)	0.197	4278	0.83 (0.05)	0.0005559		SERPINA3,GSC
873	rs11626428	14 (94960193)	A (0.33)	2238	1.24 (0.06)	0.000968975	2105	0.87 (0.07)	0.02852	4343	1.04 (0.05)	0.3988		C14orf49
874	rs926784	14 (96656675)	A (0.26)	2240	0.8 (0.07)	0.00310841	2121	0.85 (0.08)	0.03237	4361	0.82 (0.05)	0.0003045
875	rs2250789	14 (101485575)	G (0.45)	2236	0.82 (0.06)	0.00103577	2121	0.96 (0.06)	0.505	4357	0.88 (0.04)	0.004873		PPP2R5C,DYNC1H1
876	rs2819419	14 (104477283)	C (0.48)	2237	0.83 (0.06)	0.00187194				2237	0.83 (0.06)	0.001872		PLD4,KIAA0284,CDCA4,C14orf79,AHNAK2
877	rs8036650	15 (23577084)	A (0.09)	2239	1.39 (0.1)	0.00212405	1938	0.98 (0.11)	0.85	4177	1.17 (0.08)	0.03396		ATP10A
878	rs4906879	15 (24218458)	A (0.47)	2237	0.83 (0.06)	0.00168129	2114	1.08 (0.06)	0.225	4351	0.94 (0.04)	0.1595
879	rs12437604	15 (25528161)	G (0.1)	2240	0.73 (0.11)	0.00292315	2120	0.84 (0.11)	0.102	4360	0.78 (0.08)	0.001064		UBE3A
880	rs4906908	15 (27040082)	A (0.27)	2238	1.23 (0.07)	0.00261145	2120	1.09 (0.07)	0.2385	4358	1.16 (0.05)	0.00289		GABRB3,GABRA5
881	rs4779705	15 (27113158)	G (0.03)	2240	1.63 (0.16)	0.00220263	2112	1.27 (0.15)	0.1094	4352	1.43 (0.11)	0.0009276		KIAA0574,APBA2
882	rs11636503	15 (27361322)	A (0.38)	2240	1.21 (0.06)	0.00253607	2118	0.97 (0.06)	0.6417	4358	1.09 (0.04)	0.06576		NDNL2,KIAA0574
883	rs7176351	15 (28996019)	A (0.27)	2240	0.71 (0.07)	4.21324e-06	2121	0.93 (0.07)	0.3402	4361	0.82 (0.05)	7.422e-05	rs7178375 (1)	TRPM1,MTMR15,MTMR10
884	rs7178375	15 (29003227)	A (0.27)	2238	0.71 (0.07)	3.63586e-06	2041	0.88 (0.07)	0.08761	4279	0.79 (0.05)	5.927e-06		TRPM1,MTMR15,MTMR10
885	rs10520048	15 (34132596)	A (0.2)	2239	1.27 (0.07)	0.00135247	2120	1.04 (0.08)	0.6531	4359	1.15 (0.05)	0.00905
886	rs17666754	15 (38139009)	G (0.02)	2238	2.06 (0.23)	0.00241484	2120	1.25 (0.29)	0.4567	4358	1.69 (0.18)	0.007077		SRP14,EIF2AK4,BMF
887	rs2926881	15 (51722363)	C (0.27)	2240	1.29 (0.07)	0.000152426	2120	1.02 (0.07)	0.7824	4360	1.14 (0.05)	0.003648		WDR72
888	rs7182653	15 (52908591)	G (0.3)	2234	1.24 (0.06)	0.00106144	2119	1.06 (0.07)	0.382	4353	1.15 (0.05)	0.003125
889	rs2651740	15 (52913391)	A (0.42)	2237	1.2 (0.06)	0.00261995	2086	1 (0.06)	0.9702	4323	1.1 (0.04)	0.02848
890	rs9920295	15 (53013511)	A (0.05)	2240	0.6 (0.17)	0.00298147	2119	0.93 (0.15)	0.6209	4359	0.76 (0.11)	0.01337
891	rs11633131	15 (56590517)	A (0.04)	2206	1.44 (0.12)	0.00334515	2117	1.14 (0.14)	0.3701	4323	1.3 (0.09)	0.006466		LIPC,ADAM10
892	rs341387	15 (58960651)	A (0.48)	2235	1.23 (0.06)	0.000407258	2117	0.98 (0.06)	0.7582	4352	1.11 (0.04)	0.02041		RORA
893	rs4984288	15 (61540501)	G (0.28)	2239	1.23 (0.07)	0.00169266	2119	1.01 (0.07)	0.9062	4358	1.12 (0.05)	0.01968		USP3,CA12
894	rs8025327	15 (67112807)	G (0.18)	2240	1.21 (0.08)	0.016718	2115	1.14 (0.08)	0.09682	4355	1.18 (0.06)	0.004062		SMAD6
895	rs12913078	15 (71577615)	G (0.5)	2240	1.23 (0.06)	0.00111467	2119	0.87 (0.06)	0.02791	4359	1.04 (0.04)	0.4214		THSD4,LOC645296
896	rs8040372	15 (73237610)	A (0.41)	2240	1.2 (0.06)	0.0032094	2090	1 (0.06)	0.9767	4330	1.1 (0.04)	0.03579		C15orf39
897	rs11856654	15 (77283894)	G (0.47)	2218	1.21 (0.06)	0.00148319				2218	1.21 (0.06)	0.001483
898	rs925110	15 (78872667)	A (0.24)	2237	1.24 (0.07)	0.00334515	2118	1.08 (0.07)	0.2994	4355	1.15 (0.05)	0.004705		KIAA1199,FAM108C1
899	rs11073813	15 (87158450)	A (0.41)	2240	1.21 (0.06)	0.00188449	2116	1.09 (0.06)	0.1497	4356	1.15 (0.04)	0.001226		MFGE8,HAPLN3,ACAN
900	rs4932584	15 (90238288)	C (0.24)	2239	1.25 (0.07)	0.00165875	2121	0.96 (0.07)	0.5792	4360	1.1 (0.05)	0.06187		SLCO3A1
901	rs10152867	15 (93022294)	A (0.08)	2239	0.72 (0.11)	0.00438296	2118	1.15 (0.11)	0.1995	4357	0.91 (0.08)	0.251		ST8SIA2,C15orf32
902	rs7183393	15 (93758776)	A (0.2)	2237	1.28 (0.07)	0.000942063	2114	0.94 (0.07)	0.3985	4351	1.1 (0.05)	0.0746
903	rs718674	15 (96648372)	A (0.22)	2239	0.79 (0.07)	0.0022172	2120	0.87 (0.08)	0.0697	4359	0.83 (0.05)	0.0005449
904	rs304102	15 (99026608)	G (0.41)	2238	0.83 (0.06)	0.00201432	2118	0.98 (0.06)	0.7987	4356	0.9 (0.04)	0.01679		LINS1,ASB7
905	rs4965810	15 (99616263)	G (0.42)	2240	0.81 (0.06)	0.000942063	2114	0.97 (0.06)	0.5852	4354	0.89 (0.04)	0.005914		SNRPA1,SELS,PCSK6,CHSY1
906	rs1040497	16 (1462671)	G (0.33)	2237	1.2 (0.06)	0.00367859	2118	0.93 (0.07)	0.2915	4355	1.07 (0.05)	0.1783		UNKL,TMEM204,TELO2,LOC390667,LOC283951,IFT140,CLCN7
907	rs3810801	16 (2832371)	A (0.23)	2240	1.24 (0.07)	0.00169266				2240	1.24 (0.07)	0.001693		TCEB2,SRRM2,PRSS33,PRSS21,PRSS22,LOC124220,FLYWCH1,FLYWCH2
908	rs12149635	16 (5553562)	G (0.39)	2240	0.83 (0.06)	0.00357552	2113	1.03 (0.07)	0.6213	4353	0.92 (0.04)	0.08086
909	rs12924704	16 (6024489)	A (0.23)	2237	1.25 (0.07)	0.00135247	2119	0.89 (0.07)	0.09894	4356	1.06 (0.05)	0.2519		A2BP1
910	rs2178721	16 (7270339)	A (0.07)	2215	0.7 (0.12)	0.00311838	2117	0.9 (0.12)	0.4	4332	0.79 (0.09)	0.006894		A2BP1
911	rs9922089	16 (11419226)	G (0.43)	2240	1.24 (0.06)	0.000850202	2118	1.02 (0.06)	0.7141	4358	1.13 (0.05)	0.00812		C16orf75
912	rs1345442	16 (11587031)	G (0.2)	2240	1.35 (0.08)	9.24864e-05	2119	0.88 (0.08)	0.1265	4359	1.11 (0.06)	0.08236		TXNDC11,SNN,LITAF
913	rs8061475	16 (11795149)	A (0.2)	2196	0.78 (0.08)	0.0010001	2064	0.92 (0.07)	0.2226	4260	0.85 (0.05)	0.001321		ZC3H7A,TXNDC11,RSL1D1,GSPT1
914	rs11863214	16 (15041876)	A (0.2)	2235	0.78 (0.08)	0.00211004	2121	1.13 (0.08)	0.1322	4356	0.94 (0.06)	0.2495		RRN3,PDXDC1,NTAN1,NPIP
915	rs7185876	16 (20248819)	G (0.42)	2214	1.25 (0.06)	0.00025739	2120	1.05 (0.06)	0.4054	4334	1.15 (0.04)	0.001403		UMOD,PDILT,GP2,ACSM5
916	rs16972760	16 (21527771)	A (0.01)	2238	1.99 (0.22)	0.00168696	2118	1.07 (0.19)	0.7148	4356	1.41 (0.14)	0.01222		OTOA,METTL9,IGSF6
917	rs11647526	16 (22706496)	G (0.1)	2240	1.34 (0.1)	0.00302001	2120	0.93 (0.1)	0.4264	4360	1.11 (0.07)	0.1162		HS3ST2
918	rs8047644	16 (22986854)	A (0.17)	2238	1.35 (0.08)	0.000244812	2121	0.98 (0.08)	0.7872	4359	1.15 (0.06)	0.0147		USP31
919	rs4357942	16 (23147409)	A (0.43)	2239	0.83 (0.06)	0.00261995	2120	0.93 (0.06)	0.2167	4359	0.88 (0.04)	0.002543		USP31,SCNN1B,SCNN1G
920	rs705917	16 (27822228)	G (0.13)	2239	0.67 (0.11)	0.000523952	1998	1.03 (0.11)	0.7695	4237	0.83 (0.08)	0.02034		GSG1L
921	rs7200594	16 (27833739)	A (0.03)	2239	0.56 (0.17)	0.000965573	2114	1.42 (0.18)	0.05495	4353	0.87 (0.13)	0.3033		GSG1L
922	rs12325113	16 (28756169)	G (0.46)	2239	1.21 (0.06)	0.00217375				2239	1.21 (0.06)	0.002174		TUFM,SH2B1,RABEP2,LOC440350,CD19,ATXN2L,ATP2A1
923	rs252355	16 (29087908)	A (0.16)	2226	1.33 (0.08)	0.000772213				2226	1.33 (0.08)	0.0007722
924	rs12917626	16 (49803155)	A (0.22)	2239	1.33 (0.07)	7.16582e-05	2119	0.97 (0.07)	0.6393	4358	1.14 (0.05)	0.01176		SALL1
925	rs2689264	16 (52695481)	A (0.28)	2239	0.79 (0.07)	0.00084119	2121	0.96 (0.07)	0.5729	4360	0.87 (0.05)	0.005338		FTO
926	rs1864163	16 (55554734)	A (0.22)	2239	1.25 (0.07)	0.00156076				2239	1.25 (0.07)	0.001561		SLC12A3,NLRC5,HERPUD1,CETP
927	rs8045789	16 (63873304)	G (0.16)	2238	1.28 (0.08)	0.00301033	2121	1.19 (0.09)	0.04681	4359	1.23 (0.06)	0.000444		LOC283867
928	rs4785821	16 (63926655)	A (0.25)	2240	0.79 (0.08)	0.00157138	2110	0.94 (0.07)	0.425	4350	0.86 (0.05)	0.004742		LOC283867
929	rs9936829	16 (77416631)	A (0.32)	2210	0.82 (0.06)	0.00204126	2115	1 (0.07)	0.9814	4325	0.9 (0.05)	0.02864		WWOX
930	rs250133	16 (78128823)	A (0.39)	2239	0.82 (0.06)	0.00185947	2114	0.91 (0.06)	0.1316	4353	0.87 (0.04)	0.001029		MAF
931	rs8063007	16 (80099088)	A (0.16)	2240	1.29 (0.07)	0.00083523	2085	0.93 (0.08)	0.3486	4325	1.1 (0.05)	0.07952		CMIP
932	rs9972695	16 (80268484)	A (0.05)	2239	0.62 (0.15)	0.00190346	2097	1.09 (0.16)	0.6045	4336	0.81 (0.11)	0.06135		CMIP
933	rs8056050	16 (81881218)	G (0.12)	2239	1.3 (0.09)	0.00218094	2121	0.89 (0.09)	0.226	4360	1.1 (0.06)	0.1765		CDH13
934	rs12933433	16 (82975746)	A (0.08)	2240	0.69 (0.12)	0.00239124	2120	1.11 (0.12)	0.4064	4360	0.87 (0.09)	0.1101		WFDC1,KIAA1609,ATP2C2
935	rs11863271	16 (82980316)	A (0.07)	2240	1.4 (0.09)	0.000272655	2118	0.95 (0.09)	0.5867	4358	1.16 (0.06)	0.0257		WFDC1,KIAA1609,ATP2C2
936	rs7199013	16 (84065971)	G (0.07)	2240	0.64 (0.13)	0.00070091	2108	0.94 (0.13)	0.6511	4348	0.78 (0.09)	0.006005
937	rs1230	16 (88332356)	G (0.28)	2236	1.22 (0.07)	0.00256932	2118	1.09 (0.07)	0.2422	4354	1.16 (0.05)	0.002917		ZNF276,SPIRE2,SPATA2L,FANCA,CHMP1A,CDK10,C16orf7,C16orf55
938	rs4890197	17 (83173)	A (0.17)	2240	1.26 (0.08)	0.00342039	2119	1 (0.08)	0.9708	4359	1.12 (0.05)	0.03368		RPH3AL
939	rs4790145	17 (3378436)	G (0.43)	2239	0.81 (0.06)	0.000619821	2111	1.03 (0.06)	0.6716	4350	0.91 (0.04)	0.03075		TRPV3,TRPV1,SPATA22,SHPK,OR1E2,ASPA
940	rs333132	17 (4328497)	A (0.07)	2232	0.7 (0.12)	0.00339874	2121	0.96 (0.13)	0.76	4353	0.81 (0.09)	0.02085		SPNS3,SPNS2,MYBBP1A,GGT6
941	rs4617920	17 (6003705)	A (0.46)	2237	1.19 (0.06)	0.00307869	2114	0.92 (0.06)	0.2066	4351	1.06 (0.04)	0.2143		WSCD1
942	rs9989461	17 (10157411)	A (0.1)	2239	1.42 (0.1)	0.00084119	2115	0.92 (0.11)	0.4314	4354	1.15 (0.07)	0.0649		MYH8,MYH13
943	rs11653470	17 (14619011)	G (0.16)	2239	1.28 (0.08)	0.00155547	2108	0.98 (0.08)	0.7664	4347	1.12 (0.06)	0.03902		FLJ45831
944	rs1551355	17 (27056533)	A (0.21)	2240	1.24 (0.07)	0.00318897	2120	0.89 (0.07)	0.1136	4360	1.05 (0.05)	0.3123
945	rs7224103	17 (28863346)	A (0.1)	2198	0.71 (0.1)	0.000640391	2121	1.08 (0.1)	0.4434	4319	0.87 (0.07)	0.05766		ACCN1
946	rs12604055	17 (29122399)	A (0.1)	2239	0.71 (0.11)	0.00202103	2116	0.98 (0.11)	0.8657	4355	0.84 (0.08)	0.01973		ACCN1
947	rs12937141	17 (30756008)	G (0.03)	2230	1.6 (0.15)	0.00261145	2121	0.81 (0.15)	0.1579	4351	1.12 (0.11)	0.2424		SLFN12,SLFN13,SLFN11
948	rs1634523	17 (31462326)	A (0.25)	2240	0.75 (0.08)	0.000154865	2121	0.95 (0.08)	0.5312	4361	0.84 (0.06)	0.001644		TBC1D3B,CCL18,CCL3L1,CCL4,CCL3L3,CCL3,CCL23
949	rs4794031	17 (44697152)	G (0.22)	2236	1.29 (0.07)	0.000264411	2120	1.06 (0.07)	0.4551	4356	1.18 (0.05)	0.001721		ZNF652,PHOSPHO1,GNGT2,B4GALNT2,ABI3
950	rs8075803	17 (44701528)	G (0.24)	2240	1.3 (0.07)	0.000206801	2120	1.01 (0.07)	0.8859	4360	1.15 (0.05)	0.005786	rs4794031 (0.7)	ZNF652,PHOSPHO1,GNGT2,B4GALNT2,ABI3
951	rs11655670	17 (45929201)	A (0.14)	2240	1.29 (0.07)	0.000688397	2119	1.03 (0.08)	0.7428	4359	1.16 (0.05)	0.00777		SPATA20,RSAD1,MYCBPAP,LRRC59,EPN3,CHAD,CACNA1G,ACSF2
952	rs16953883	17 (49296392)	A (0.07)	2238	0.67 (0.13)	0.00232933	2119	0.96 (0.12)	0.7176	4357	0.81 (0.09)	0.01492		KIF2B
953	rs17760549	17 (52195492)	A (0.05)	2240	1.52 (0.12)	0.000850202	2103	1.05 (0.15)	0.7582	4343	1.31 (0.1)	0.009055		DGKE,C17orf67
954	rs722168	17 (53267969)	G (0.09)	2240	0.73 (0.11)	0.00330283	2121	0.98 (0.11)	0.832	4361	0.84 (0.08)	0.02422		MRPS23,CUEDC1
955	rs1864649	17 (54087622)	A (0.5)	2239	1.24 (0.06)	0.000543535	2120	1.09 (0.06)	0.1629	4359	1.17 (0.04)	0.0005571
956	rs1002446	17 (63936518)	A (0.21)	2239	0.79 (0.08)	0.00287776	2120	1.01 (0.08)	0.8815	4359	0.89 (0.06)	0.04214		WIPI1,PRKAR1A,ARSG
957	rs1473120	17 (65269890)	G (0.15)	2236	0.74 (0.09)	0.000975814	2120	1.06 (0.09)	0.5408	4356	0.88 (0.06)	0.05289
958	rs16974626	17 (65437401)	G (0.04)	2239	1.62 (0.15)	0.0010467	2093	0.96 (0.16)	0.7828	4332	1.27 (0.11)	0.03041
959	rs11657243	17 (65452102)	A (0.03)	2240	0.55 (0.2)	0.00271515	2119	0.87 (0.22)	0.5424	4359	0.67 (0.15)	0.01005
960	rs11658597	17 (68519196)	G (0.1)	2238	1.36 (0.1)	0.00202103	2117	0.78 (0.1)	0.01477	4355	1.04 (0.07)	0.6078		SLC39A11
961	rs4789127	17 (70540347)	G (0.41)	2234	1.22 (0.06)	0.00111843	2119	1.02 (0.06)	0.7868	4353	1.12 (0.04)	0.01162		SLC16A5,OTOP3,OTOP2,NT5C,KCTD2,ICT1,CDR2L,C17orf28,ATP5H,ARMC7
962	rs7223674	17 (70925044)	G (0.04)	2239	0.55 (0.19)	0.00151894	2121	0.72 (0.2)	0.1043	4360	0.63 (0.14)	0.0006608		TSEN54,KIAA0195,GRB2,CASKIN2
963	rs1877926	17 (76525636)	A (0.33)	2238	0.81 (0.06)	0.00180427	2119	1.04 (0.07)	0.5524	4357	0.92 (0.05)	0.06842		KIAA1303,CHMP6,BAIAP2
964	rs3786446	18 (3738024)	G (0.32)	2238	1.26 (0.06)	0.000311636	2118	1.01 (0.06)	0.8141	4356	1.13 (0.04)	0.005991		DLGAP1
965	rs7243806	18 (3820050)	G (0.36)	2239	1.2 (0.06)	0.00264561	2120	0.91 (0.06)	0.1348	4359	1.05 (0.04)	0.2663		DLGAP1
966	rs16945853	18 (3993975)	G (0.01)	2240	2.02 (0.23)	0.0027684	2119	1.68 (0.25)	0.03728	4359	1.85 (0.17)	0.0003217
967	rs6506440	18 (6771016)	A (0.18)	2240	0.78 (0.08)	0.0031384	2117	0.9 (0.09)	0.2417	4357	0.84 (0.06)	0.003346		ARHGAP28
968	rs11659898	18 (9738110)	A (0.34)	2234	1.22 (0.06)	0.0016365	2121	1.18 (0.06)	0.007574	4355	1.2 (0.04)	3.801e-05		RAB31
969	rs9958678	18 (10265935)	G (0.11)	2239	1.31 (0.09)	0.00227637	2121	1.22 (0.09)	0.036	4360	1.27 (0.06)	0.0002629
970	rs8089335	18 (19124158)	G (0.21)	2240	1.27 (0.07)	0.000608661	2115	1.03 (0.07)	0.6327	4355	1.15 (0.05)	0.005249		CABLES1,C18orf45
971	rs9949617	18 (19133215)	A (0.47)	2238	0.77 (0.06)	4.91644e-05	2120	0.78 (0.06)	0.00013	4358	0.78 (0.05)	2.433e-08		CABLES1,C18orf45
972	rs4800467	18 (19158404)	G (0.47)	2238	0.77 (0.06)	3.85776e-05	2120	0.81 (0.06)	0.0006991	4358	0.79 (0.04)	1.073e-07	rs9949617 (0.9)	CABLES1,C18orf45
973	rs6508240	18 (20025270)	C (0.37)	2233	0.8 (0.06)	0.00038502	2120	0.98 (0.06)	0.7743	4353	0.88 (0.04)	0.006091		TTC39C,OSBPL1A,CABYR
974	rs489631	18 (20243022)	G (0.03)	2239	0.5 (0.2)	0.000543535	2121	1.25 (0.2)	0.2605	4360	0.79 (0.14)	0.09036		OSBPL1A,IMPACT,HRH4
975	rs4800631	18 (21209679)	C (0.43)	2240	1.28 (0.06)	5.25989e-05	2118	0.99 (0.06)	0.8579	4358	1.13 (0.04)	0.005532		ZNF521
976	rs1370911	18 (22461691)	A (0.1)	2239	1.43 (0.09)	0.000211272	2108	1 (0.1)	0.9723	4347	1.21 (0.07)	0.00729		KCTD1
977	rs4591219	18 (26177252)	G (0.41)	2239	0.82 (0.07)	0.00310841				2239	0.82 (0.07)	0.003108
978	rs2912332	18 (27146504)	G (0.12)	2239	1.32 (0.09)	0.0015502	2119	0.98 (0.09)	0.8342	4358	1.14 (0.06)	0.03378		DSG4,DSG1
979	rs8091481	18 (27305675)	G (0.04)	2240	1.49 (0.13)	0.00248692	2120	0.82 (0.13)	0.1304	4360	1.11 (0.09)	0.2655		DSG3,DSG4,DSG2
980	rs10502618	18 (29682157)	C (0.06)	2240	1.4 (0.11)	0.00296236	2121	1.12 (0.11)	0.3198	4361	1.26 (0.08)	0.00475		NOL4
981	rs4622583	18 (30064372)	C (0.49)	2137	0.8 (0.06)	0.000359834	2120	0.97 (0.06)	0.6468	4257	0.88 (0.04)	0.004354		NOL4
982	rs1187258	18 (33541088)	A (0.03)	2240	1.65 (0.15)	0.000968975	2119	1.14 (0.17)	0.438	4359	1.4 (0.11)	0.003662
983	rs2440455	18 (37276631)	G (0.42)	2240	1.21 (0.06)	0.00248692	2121	1.1 (0.06)	0.1159	4361	1.16 (0.04)	0.001097
984	rs11872317	18 (42770086)	A (0.02)	2240	0.43 (0.27)	0.00201432	2113	0.97 (0.27)	0.9256	4353	0.65 (0.19)	0.02259		TCEB3CL,TCEB3B,TCEB3C,PIAS2,KATNAL2
985	rs16978559	18 (43982231)	G (0.05)	2240	1.4 (0.12)	0.00760744	2121	1.14 (0.14)	0.3509	4361	1.28 (0.09)	0.01036		RNF165
986	rs7236100	18 (51453319)	G (0.13)	2238	1.37 (0.08)	0.000273702	2121	0.93 (0.09)	0.422	4359	1.14 (0.06)	0.04062		TCF4
987	rs9964346	18 (54420186)	A (0.39)	2240	1.21 (0.06)	0.00220263	2118	1.06 (0.06)	0.3107	4358	1.13 (0.04)	0.003713		MALT1,ALPK2
988	rs2331532	18 (55238603)	G (0.43)	2239	1.19 (0.06)	0.00408006	2117	1.01 (0.06)	0.9277	4356	1.1 (0.04)	0.03382		LMAN1,CCBE1
989	rs4516326	18 (65333716)	A (0.38)	2238	1.22 (0.06)	0.00217375	2121	0.92 (0.06)	0.1867	4359	1.06 (0.05)	0.2022		DOK6
990	rs12326139	18 (65429505)	A (0.16)	2239	1.27 (0.08)	0.00351939	2052	0.99 (0.09)	0.8656	4291	1.13 (0.06)	0.04648		DOK6
991	rs2852143	18 (67471987)	G (0.24)	2239	0.78 (0.08)	0.00147313	2120	1.06 (0.08)	0.4501	4359	0.9 (0.06)	0.07972		DOK6,CD226
992	rs1922110	18 (68241268)	A (0.18)	2237	1.24 (0.08)	0.00768579	2110	1.04 (0.09)	0.6576	4347	1.14 (0.06)	0.02635
993	rs2554132	18 (70744440)	A (0.24)	2235	0.76 (0.08)	0.000380711	2118	0.91 (0.08)	0.2365	4353	0.83 (0.05)	0.0007471		ZNF407
994	rs991531	18 (71883890)	G (0.14)	2228	0.73 (0.09)	0.000859305	2120	0.82 (0.09)	0.02807	4348	0.77 (0.07)	8.875e-05
995	rs8090014	18 (72484246)	A (0.2)	2237	0.77 (0.08)	0.000993106				2237	0.77 (0.08)	0.0009931
996	rs1367752	18 (73875153)	G (0.28)	2240	0.95 (0.07)	0.413559	2114	1.01 (0.07)	0.8915	4354	0.98 (0.05)	0.6231
997	rs1879039	19 (3682847)	A (0.1)	2240	0.74 (0.1)	0.00428868	2120	1.01 (0.11)	0.9072	4360	0.86 (0.08)	0.04931		ZFR2,TJP3,RAX2,PIP5K1C,MRPL54,MATK,APBA3
998	rs12984689	19 (3817512)	C (0.03)	2240	0.65 (0.14)	0.00264561	2114	0.78 (0.14)	0.07999	4354	0.71 (0.1)	0.0007351		ZFR2,RAX2,MRPL54,MATK,ITGB1BP3,DAPK3,ATCAY
999	rs11085841	19 (13248250)	A (0.16)	2240	1.48 (0.09)	3.31766e-05	2117	0.98 (0.08)	0.8473	4357	1.18 (0.06)	0.004487		CACNA1A
1000	rs16030	19 (13248904)	G (0.11)	2238	1.36 (0.08)	0.000256401	2119	0.99 (0.08)	0.9171	4357	1.16 (0.06)	0.01085	rs11085841 (0.7)	CACNA1A
1001	rs2607276	19 (13815633)	C (0.25)	2148	1.27 (0.07)	0.00179823	2120	1.13 (0.07)	0.08178	4268	1.19 (0.05)	0.0005791		ZSWIM4,PODNL1,NANOS3,MGC3207,CCDC130,CC2D1A,C19orf57,C19orf53
1002	rs11670064	19 (14308600)	G (0.41)	2238	0.83 (0.06)	0.00247882	2121	1.05 (0.06)	0.4109	4359	0.93 (0.04)	0.1108		PKN1,DDX39,CD97
1003	rs9305046	19 (14603924)	A (0.07)	2239	0.61 (0.15)	0.00112624	2081	1 (0.15)	0.9879	4320	0.77 (0.11)	0.01851		ZNF333,NDUFB7,GPSN2,FLJ45910,EMR3
1004	rs10412060	19 (16439881)	A (0.08)	2238	0.7 (0.12)	0.00283172	2115	0.84 (0.12)	0.1548	4353	0.77 (0.08)	0.001734		SLC35E1,EPS15L1,CHERP,CALR3,C19orf44
1005	rs12327843	19 (17865912)	G (0.14)	2240	0.74 (0.09)	0.00165875	2089	0.85 (0.1)	0.1147	4329	0.79 (0.07)	0.0007841		SLC5A5,RPL18A,KCNN1,JAK3,INSL3,CCDC124,B3GNT3
1006	rs4808714	19 (17883074)	A (0.16)	2240	0.76 (0.09)	0.00185326	2115	0.92 (0.09)	0.3344	4355	0.83 (0.06)	0.003671		SLC5A5,RPL18A,KCNN1,JAK3,INSL3,CCDC124,B3GNT3,ARRDC2
1007	rs2228603	19 (19190924)	A (0.03)	2240	0.34 (0.26)	2.96602e-05				2240	0.34 (0.26)	2.966e-05		TMEM161A,TM6SF2,SF4,RFXANK,NR2C2AP,NCAN,MEF2B,HAPLN4
1008	rs2002318	19 (19599506)	T (0.11)	2240	0.77 (0.11)	0.0214488				2240	0.77 (0.11)	0.02145		ZNF14,ZNF101,PBX4,NDUFA13,LPAR2,GMIP,FLJ44968,CILP2,ATP13A1
1009	rs2304130	19 (19650528)	G (0.14)	2239	0.68 (0.09)	4.63346e-05	2121	0.92 (0.09)	0.3541	4360	0.8 (0.07)	0.0003634		ZNF14,ZNF101,PBX4,LPAR2,GMIP,ATP13A1
1010	rs16996148	19 (19658472)	A (0.05)	2240	0.58 (0.18)	0.00204079	2100	0.78 (0.15)	0.09539	4340	0.69 (0.11)	0.000736		TSSK6,PBX4,NDUFA13,LPAR2,GMIP,GATAD2A,FLJ44968,CILP2,ATP13A1
1011	rs1116194	19 (28238570)	G (0.27)	2235	1.24 (0.07)	0.00148319	2121	1.04 (0.07)	0.5728	4356	1.14 (0.05)	0.007588
1012	rs7250467	19 (33261241)	C (0.39)	2240	0.83 (0.06)	0.00237562	2121	1 (0.07)	0.9883	4361	0.91 (0.04)	0.03019
1013	rs7255674	19 (36480765)	C (0.21)	2239	0.79 (0.08)	0.00263703	2117	1.02 (0.08)	0.8151	4356	0.89 (0.06)	0.04627		TSHZ3
1014	rs11668731	19 (40294338)	G (0.25)	2240	1.22 (0.06)	0.0023601				2240	1.22 (0.06)	0.00236		SCN1B,LGI4,HPN,GRAMD1A,FXYD7,FXYD5,FXYD3,FXYD1
1015	rs916694	19 (40384243)	G (0.34)	2237	1.23 (0.06)	0.00105404	2120	0.99 (0.07)	0.9103	4357	1.11 (0.05)	0.02329		USF2,TMEM162,MAG,LSR,LGI4,HAMP,FXYD7,FXYD5,FXYD3,FXYD1
1016	rs12973063	19 (42009673)	G (0.13)	2239	1.28 (0.08)	0.00383225	2120	0.91 (0.09)	0.3107	4359	1.09 (0.06)	0.1721		CEACAM21,BCKDHA,B3GNT8,ATP5SL
1017	rs11879029	19 (44071746)	A (0.06)	2239	1.41 (0.11)	0.00342039				2239	1.4 (0.11)	0.00342		SIRT2,SARS2,NFKBIB,MRPS12,LGALS4,HNRNPL,GAL7,FLJ45909,FBXO17,ECH1
1018	rs314661	19 (51864313)	G (0.33)	2238	1.21 (0.06)	0.00231409	2121	0.95 (0.06)	0.3819	4359	1.07 (0.05)	0.1157		STRN4,PTGIR,PRKD2,GNG8,FKRP,DACT3,CALM3
1019	rs6509294	19 (52015224)	A (0.12)	2240	1.35 (0.08)	0.000153641	2116	0.93 (0.09)	0.4107	4356	1.14 (0.06)	0.03228		STRN4,SLC1A5,GRLF1,FKRP,AP2S1
1020	rs4802442	19 (53400939)	G (0.45)	2239	0.83 (0.06)	0.00321966	2119	0.97 (0.06)	0.6125	4358	0.9 (0.04)	0.01371		ZNF114,PLA2G4C,LIG1,CCDC114,CARD8
1021	rs9967593	19 (53470436)	A (0.03)	2238	1.84 (0.18)	0.000989625	2116	0.98 (0.18)	0.8943	4354	1.33 (0.13)	0.02329		ZNF160,ZNF816A,ZNF321,ZNF320
1022	rs4801824	19 (55448942)	G (0.19)	2238	1.27 (0.07)	0.00160907	2118	1.06 (0.08)	0.4159	4356	1.16 (0.05)	0.004681		MYH14,KCNC3,C19orf41
1023	rs1661957	19 (58169921)	A (0.03)	2239	1.86 (0.18)	0.000586898	2045	0.59 (0.16)	0.001393	4284	1 (0.12)	0.7818	rs9967593 (0.8)	ZNF160,ZNF816A,ZNF321,ZNF320
1024	rs734517	19 (60524888)	A (0.04)	2237	1.52 (0.13)	0.00200764				2237	1.52 (0.13)	0.002008		UBE2S,TMEM86B,TMEM190,SUV420H2,SAPS1,RPL28,LOC284417,IL11,HSPBP1,COX6B2,BRSK1
1025	rs17207579	19 (61973389)	A (0.22)	2240	0.79 (0.07)	0.00158206	2111	0.95 (0.08)	0.5017	4351	0.86 (0.05)	0.006243		ZNF835,ZIM2,PEG3
1026	rs6115892	20 (3359569)	A (0.3)	2235	0.81 (0.07)	0.00188449	2120	1.05 (0.07)	0.4535	4355	0.92 (0.05)	0.08849		C20orf194,ATRN
1027	rs2295371	20 (5502689)	G (0.04)	2239	1.55 (0.13)	0.000982697	2116	0.99 (0.14)	0.939	4355	1.26 (0.1)	0.02091		RP5-1022P6.2
1028	rs805743	20 (5638409)	G (0.39)	2240	0.81 (0.06)	0.00137114	2118	0.83 (0.07)	0.005225	4358	0.82 (0.05)	2.219e-05		RP5-1022P6.2,C20orf196
1029	rs6077115	20 (6900829)	A (0.26)	2234	0.8 (0.07)	0.00228387	2103	0.89 (0.07)	0.113	4337	0.84 (0.05)	0.0009911
1030	rs7262442	20 (17579573)	A (0.25)	2237	1.23 (0.07)	0.00302972	2121	1.17 (0.07)	0.02522	4358	1.2 (0.05)	0.0002283		RRBP1,DSTN,BANF2
1031	rs1055177	20 (18412673)	C (0.32)	2240	0.82 (0.07)	0.0031384	2121	0.97 (0.07)	0.6732	4361	0.89 (0.05)	0.0159		SEC23B,RBBP9,POLR3F,C20orf12
1032	rs6036227	20 (22755870)	A (0.39)	2239	1.23 (0.06)	0.0010839				2239	1.23 (0.06)	0.001084
1033	rs2104417	20 (34127871)	A (0.17)	2240	0.78 (0.08)	0.00187821	2120	0.91 (0.09)	0.255	4360	0.84 (0.06)	0.002511		SPAG4,ERGIC3,CPNE1,CEP250
1034	rs6064832	20 (36718407)	A (0.05)	2240	1.55 (0.13)	0.000617574	2116	0.94 (0.14)	0.6242	4356	1.23 (0.09)	0.03454		SLC32A1,KIAA1219,ADIG,ACTR5
1035	rs1997833	20 (39123756)	G (0.18)	2237	1.29 (0.08)	0.00117009	2000	1.15 (0.09)	0.09967	4237	1.22 (0.06)	0.0004833		TOP1,PLCG1
1036	rs12479905	20 (42136289)	A (0.32)	2240	1.22 (0.06)	0.00229139	2044	1.03 (0.07)	0.6316	4284	1.13 (0.05)	0.0112		TOX2,JPH2
1037	rs6012416	20 (46467236)	G (0.38)	2239	1.19 (0.06)	0.00322995	2120	1.01 (0.06)	0.8874	4359	1.1 (0.04)	0.02715
1038	rs530461	20 (47901123)	G (0.39)	2238	1.2 (0.06)	0.00308857	2119	0.86 (0.06)	0.01494	4357	1.02 (0.04)	0.6721		SPATA2,SLC9A8,RNF114
1039	rs2869621	20 (49990077)	A (0.14)	2233	0.74 (0.09)	0.0018164	2109	1.01 (0.1)	0.9013	4342	0.86 (0.07)	0.03155
1040	rs2426638	20 (54720974)	G (0.2)	2240	1.26 (0.07)	0.000791769	2112	0.85 (0.07)	0.0312	4352	1.05 (0.05)	0.3646		TFAP2C
1041	rs1334113	20 (55975529)	G (0.12)	2240	1.35 (0.08)	0.000401213	2121	0.93 (0.08)	0.4048	4361	1.12 (0.06)	0.05051
1042	rs6128593	20 (57510987)	A (0.17)	2240	1.32 (0.08)	0.000452011				2240	1.32 (0.08)	0.000452
1043	rs768451	20 (58089229)	G (0.4)	2237	0.83 (0.06)	0.0033558	2116	0.97 (0.06)	0.6652	4353	0.9 (0.04)	0.0162		CDH26,C20orf197
1044	rs2015810	20 (62323374)	A (0.18)	2240	1.26 (0.07)	0.00140439	2092	0.92 (0.08)	0.2823	4332	1.09 (0.05)	0.1213		PCMTD2,MYT1
1045	rs2823035	21 (15364175)	A (0.22)	2240	1.26 (0.07)	0.000975814	2115	0.93 (0.07)	0.3099	4355	1.09 (0.05)	0.09748
1046	rs2823243	21 (15656743)	G (0.1)	2240	1.38 (0.1)	0.00144823	2119	1.02 (0.1)	0.8505	4359	1.19 (0.07)	0.01576
1047	rs440294	21 (16667254)	A (0.29)	2229	0.8 (0.07)	0.0010001	2118	1.03 (0.07)	0.6589	4347	0.91 (0.05)	0.04055		C21orf34
1048	rs2212784	21 (19036514)	G (0.35)	2238	0.82 (0.06)	0.00119055	2121	1.04 (0.07)	0.4972	4359	0.92 (0.05)	0.06448
1049	rs2825154	21 (19108175)	A (0.19)	2172	0.78 (0.07)	0.000671227	2094	1.04 (0.08)	0.6512	4266	0.89 (0.05)	0.03485
1050	rs2825172	21 (19119089)	A (0.43)	2235	1.22 (0.06)	0.0013249	2121	1.06 (0.06)	0.369	4356	1.14 (0.04)	0.003427
1051	rs2248194	21 (19231904)	G (0.16)	2240	0.76 (0.08)	0.00113804	2121	1.04 (0.09)	0.6365	4361	0.88 (0.06)	0.04523
1052	rs17768396	21 (19253526)	A (0.09)	2240	1.45 (0.12)	0.00211991	2121	0.87 (0.11)	0.237	4361	1.11 (0.08)	0.1683		C21orf91
1053	rs2407254	21 (19992941)	G (0.17)	2240	0.75 (0.08)	0.000551557	2115	0.95 (0.09)	0.5138	4355	0.84 (0.06)	0.003363
1054	rs1041789	21 (20652664)	A (0.48)	2240	0.83 (0.06)	0.00302001	2117	1 (0.06)	0.996	4357	0.91 (0.04)	0.03376
1055	rs229441	21 (20930683)	A (0.3)	2239	0.78 (0.07)	0.00013853	2119	1.03 (0.07)	0.6875	4358	0.89 (0.05)	0.01425
1056	rs2826548	21 (21123662)	A (0.31)	2237	1.21 (0.06)	0.00312838	2118	1.03 (0.06)	0.6568	4355	1.12 (0.05)	0.0152
1057	rs13048272	21 (22174054)	G (0.18)	2240	1.27 (0.08)	0.00265421	2120	0.95 (0.08)	0.4654	4360	1.09 (0.05)	0.09997
1058	rs1060576	21 (38753354)	A (0.02)	2240	0.37 (0.31)	0.00127679	2118	1.22 (0.24)	0.3982	4358	0.78 (0.19)	0.08536		DYRK1A
1059	rs673086	21 (39902931)	G (0.16)	2239	0.77 (0.08)	0.00245464	2118	0.96 (0.09)	0.6784	4357	0.86 (0.06)	0.01388		SH3BGR,B3GALT5
1060	rs2837798	21 (41028575)	G (0.05)	2237	0.64 (0.14)	0.00131583	2121	0.94 (0.14)	0.6283	4358	0.78 (0.1)	0.008306		DSCAM
1061	rs2839467	21 (42386269)	A (0.36)	2238	0.82 (0.06)	0.00263703	2100	1.04 (0.07)	0.5685	4338	0.92 (0.05)	0.07787		ZNF295,UMODL1
1062	rs691567	21 (42616108)	G (0.42)	2237	0.78 (0.06)	5.30439e-05	2121	1.01 (0.06)	0.9163	4358	0.88 (0.04)	0.004766		UBASH3A,TMPRSS3,TFF1,TFF3,TFF2,ABCG1
1063	rs2838701	21 (45081697)	A (0.08)	2240	0.66 (0.12)	0.000761241	2094	1 (0.13)	0.9779	4334	0.81 (0.09)	0.01471		UBE2G2,SUMO3,PTTG1IP,ITGB2
1064	rs9605246	22 (16111977)	G (0.11)	2238	0.73 (0.1)	0.00101779	2119	0.83 (0.1)	0.06497	4357	0.78 (0.07)	0.0002708		CECR5,CECR1
1065	rs7286062	22 (20780073)	C (0.02)	2237	1.8 (0.17)	0.000520115	2121	0.71 (0.16)	0.02949	4358	1.1 (0.12)	0.3333
1066	rs2282476	22 (22793564)	A (0.39)	2240	0.82 (0.06)	0.00216659	2119	1.03 (0.06)	0.6091	4359	0.92 (0.04)	0.06553		GSTT1,CABIN1
1067	rs762057	22 (32280513)	G (0.49)	2237	1.24 (0.06)	0.000363921	2114	1.09 (0.06)	0.1495	4351	1.17 (0.04)	0.0003697		LARGE
1068	rs5759325	22 (42137207)	A (0.08)	2239	0.66 (0.14)	0.00360958	2083	1.19 (0.15)	0.2439	4322	0.87 (0.1)	0.1985		SCUBE1,MPPED1
1069	rs135085	22 (42150230)	A (0.04)	2240	0.57 (0.16)	0.000367792	2114	1.1 (0.16)	0.5438	4354	0.78 (0.11)	0.03301		SCUBE1,MPPED1
1070	rs11913389	22 (42832968)	A (0.17)	2238	0.78 (0.08)	0.00155547	2119	0.88 (0.09)	0.1414	4357	0.82 (0.06)	0.0009902		PARVB,PARVG
1071	rs2032489	22 (47222142)	G (0.35)	2238	0.79 (0.07)	0.000508761	2118	0.91 (0.07)	0.1279	4356	0.85 (0.05)	0.0003806		FAM19A5
1072	rs848724	22 (48128526)	G (0.39)	2240	0.82 (0.06)	0.00170985				2240	0.82 (0.06)	0.00171
1073	rs5915462	23 (4906439)	C (0.25)	2230	1.29 (0.08)	0.00192261	2118	0.84 (0.08)	0.04616	4348	1.05 (0.06)	0.4066
1074	rs5935185	23 (11840386)	G (0.29)	2238	1.29 (0.07)	0.000470817	2118	0.91 (0.07)	0.196	4356	1.08 (0.05)	0.1085
1075	rs17285811	23 (23239172)	A (0.08)	2148	0.6 (0.16)	0.00188449	2118	1.2 (0.17)	0.3024	4266	0.83 (0.12)	0.1392		PTCHD1
1076	rs5927972	23 (32286866)	G (0.29)	2238	0.78 (0.08)	0.00223922	2120	0.95 (0.08)	0.5231	4358	0.86 (0.06)	0.008396		DMD
1077	rs28597855	23 (36767333)	G (0.13)	2238	0.73 (0.1)	0.00302972	2117	0.95 (0.11)	0.6205	4355	0.83 (0.07)	0.01349
1078	rs5918419	23 (37675587)	A (0.11)	2240	0.62 (0.13)	0.000310454	2120	1.11 (0.14)	0.4422	4360	0.82 (0.1)	0.04045		DYNLT3,CXorf27
1079	rs199867	23 (38622287)	A (0.39)	2240	0.81 (0.07)	0.00406733	2120	1.12 (0.07)	0.1241	4360	0.95 (0.05)	0.3237		MID1IP1
1080	rs5907032	23 (44355107)	A (0.13)	2239	1.38 (0.1)	0.00267149	2114	1.06 (0.11)	0.5856	4353	1.21 (0.08)	0.01128		FUNDC1
1081	rs4828096	23 (81928637)	G (0.47)	2239	0.8 (0.07)	0.00227637	2117	1.02 (0.07)	0.819	4356	0.9 (0.05)	0.04253
1082	rs7884660	23 (93877273)	G (0.01)	2240	0.15 (0.62)	0.00243865	2121	2.94 (0.6)	0.07137	4361	0.7 (0.43)	0.3603
1083	rs5949305	23 (94720788)	G (0.21)	2228	0.75 (0.08)	0.000563798	2119	0.93 (0.08)	0.3839	4347	0.83 (0.06)	0.002093
1084	rs942275	23 (95178732)	A (0.06)	2240	0.59 (0.15)	0.000331142	2118	0.77 (0.16)	0.09842	4358	0.66 (0.11)	0.0001948
1085	rs3747406	23 (106907625)	G (0.11)	2238	0.7 (0.12)	0.00307869	2121	1.06 (0.12)	0.6131	4359	0.86 (0.08)	0.07705		TSC22D3,MID2
1086	rs6568215	23 (113068206)	A (0.18)	2235	0.74 (0.09)	0.0012801	2118	0.99 (0.09)	0.9125	4353	0.86 (0.07)	0.01712
1087	rs1321391	23 (114186993)	G (0.39)	2238	1.3 (0.07)	0.00025739	2120	0.89 (0.07)	0.1071	4358	1.08 (0.05)	0.1349		LRCH2,IL13RA2
1088	rs2190292	23 (116421419)	G (0.15)	2222	0.69 (0.1)	0.00028114	2117	0.89 (0.11)	0.2925	4339	0.78 (0.07)	0.0008547
1089	rs2213355	23 (124720741)	G (0.39)	2240	1.21 (0.07)	0.00716098	2117	0.87 (0.07)	0.04605	4357	1.03 (0.05)	0.5908
1090	rs4829627	23 (136908418)	G (0.17)	2238	0.72 (0.1)	0.000711073	2065	1.04 (0.09)	0.6867	4303	0.87 (0.07)	0.03062
1091	rs5905103	23 (146577773)	A (0.17)	2239	1.39 (0.08)	0.000105357	2118	0.89 (0.08)	0.1867	4357	1.12 (0.06)	0.06298
1092	rs762650	23 (152698396)	A (0.2)	2238	0.69 (0.1)	0.000144168	2067	1.12 (0.1)	0.258	4305	0.87 (0.07)	0.05038		SSR4,SRPK3,SLC6A8,PLXNB3,PDZD4,L1CAM,IDH3G,BCAP31,ABCD1
	1Chromosomal position given on NCBI Build 36.1.
	2P-values are adjused using genomic-control
	3Pairwise LD in r2≥0.7 are listed
	4Refseq genes located within ±100kb of the SNP are listed
